# Supplementary material for: Climate-Related Hazards: A Method for Global Assessment of Urban and Rural Population Exposure to Cyclones, Droughts, and Floods
Source: PubMed Central journal article supplement (PMC3945591; doi:10.3390/ijerph110202169), 2014-02-21
Supplement: ijerph-11-02169-s001.pdf [file ijerph-11-02169-s001.pdf]

# Climate-Related Hazards: A Method for Global Assessment of Urban and Rural Population Exposure to Cyclone, Drought, and Flood

ArcGIS Toolbox: Exposure Assessment for Global Model [1]

**Table S1.** Comparison of previous global hazard risk assessments.

| Assessment              | DRI                                                                                                                                                            | GNDRH                                                                                         | GAR 2009                                                                                               | GAR 2013                                                                                                                                                                                                                                 |
|-------------------------|----------------------------------------------------------------------------------------------------------------------------------------------------------------|-----------------------------------------------------------------------------------------------|--------------------------------------------------------------------------------------------------------|------------------------------------------------------------------------------------------------------------------------------------------------------------------------------------------------------------------------------------------|
| Citation                | UNDP 2004                                                                                                                                                      | Dilley <i>et al.</i> 2005 [2]                                                                 | UNISDR, <i>Global Assessment Report on Disaster Risk Reduction</i> . 2009 [3]                          | UNISDR, <i>Global Assessment Report on Disaster Risk Reduction</i> . 2013 [4]                                                                                                                                                            |
| Input Data              | Hazard: frequency of cyclone, drought, flood, earthquake<br>Observed Mortality: EM-DAT                                                                         | Hazard: cyclone, drought, earthquake, flood, landslide, volcano<br>Observed Mortality: EM-DAT | Hazard: cyclone, drought, earthquake, flood, landslide<br>Observed Mortality and Economic Loss: EM-DAT | Hazard: cyclone, earthquake                                                                                                                                                                                                              |
| Vulnerability Variables | rate of urban growth, gross domestic product per capita, percent arable land, human development index, percent population with access to improved water supply | region of the world, wealth status                                                            | government accountability, per capita income, remoteness, urban growth                                 | building class: income, construction quality, education<br>hazard measurement parameter: varies depending on hazard (e.g., water depth for flooding) identifies variables that best explain mortality risk to different types of hazards |
| Outcomes Modelled       | relative risk of hazard mortality                                                                                                                              | relative risk of hazard mortality, relative risk of economic loss due to hazard               | relative risk of hazard mortality, relative risk of economic loss due to hazard                        | urban economic loss expressed as likelihood per year                                                                                                                                                                                     |

Table S1. Cont.

| Assessment        | DRI                                                                                                                                                                                                           | GNDRH                                                                                                                                                                                 | GAR 2009                                                                                                                                                                      | GAR 2013                                                                                                                                                                                                                                            |
|-------------------|---------------------------------------------------------------------------------------------------------------------------------------------------------------------------------------------------------------|---------------------------------------------------------------------------------------------------------------------------------------------------------------------------------------|-------------------------------------------------------------------------------------------------------------------------------------------------------------------------------|-----------------------------------------------------------------------------------------------------------------------------------------------------------------------------------------------------------------------------------------------------|
| Estimation Method | multiplied population exposed (at time of event) by hazard frequency and model-selected vulnerability variables to predict observed mortality for a hazard using multiple regression equation for each hazard | multiplied current population exposed by hazard frequency weighted by vulnerability coefficients at each grid cell and allocated mortality proportionally to equal observed mortality | multiplied current population by hazard frequency weighted by vulnerability coefficients at each grid cell and allocated mortality proportionally to equal observed mortality | each urban grid cell is given a building class. Probabilistic model statistically represents frequency of future hazard events. Vulnerability is determined by modeling relationship between building class and measurement parameter of the hazard |

Table S2. Population exposure rank by country.

| Country                | Rural Per Capita Multi-Hazard Exposure Rank | Urban Per Capita Multi-Hazard Exposure Rank | Cyclone Rank | Drought Rank | Flood Rank | Multi-Hazard Exposure Rank |
|------------------------|---------------------------------------------|---------------------------------------------|--------------|--------------|------------|----------------------------|
| Afghanistan            | 49                                          | 16                                          | 93           | 32           | 45         | 46                         |
| Albania                | 172                                         | 188                                         | 93           | 178          | 114        | 186                        |
| Algeria                | 94                                          | 89                                          | 93           | 83           | 71         | 89                         |
| American Samoa         | 179                                         | 185                                         | 62           | 136          | 181        | 189                        |
| Andorra                | 178                                         | 179                                         | 93           | 141          | 127        | 185                        |
| Angola                 | 107                                         | 81                                          | 93           | 23           | 125        | 93                         |
| Anguilla               | N/A                                         | 30                                          | 16           | 45           | 151        | 22                         |
| Antigua and Barbuda    | 13                                          | 26                                          | 9            | 70           | 134        | 18                         |
| Argentina              | 95                                          | 66                                          | 93           | 92           | 36         | 67                         |
| Armenia                | 165                                         | 202                                         | 93           | 137          | 156        | 195                        |
| Aruba                  | 166                                         | 182                                         | 75           | 142          | 131        | 179                        |
| Australia <sup>1</sup> | 133                                         | 100                                         | 71           | 95           | 74         | 106                        |
| Austria                | 149                                         | 152                                         | 93           | 193          | 75         | 154                        |
| Azerbaijan             | 122                                         | 131                                         | 93           | 50           | 140        | 130                        |
| Bahamas                | 99                                          | 134                                         | 29           | 181          | 181        | 129                        |
| Bahrain                | 205                                         | 214                                         | 93           | 193          | 178        | 217                        |
| Bangladesh             | 3                                           | 8                                           | 53           | 29           | 2          | 6                          |
| Barbados               | 102                                         | 105                                         | 58           | 45           | 133        | 111                        |
| Belarus                | 171                                         | 189                                         | 93           | 193          | 115        | 190                        |
| Belgium                | 112                                         | 133                                         | 93           | 172          | 53         | 131                        |
| Belize                 | 44                                          | 44                                          | 24           | 193          | 76         | 48                         |
| Benin                  | 79                                          | 108                                         | 93           | 90           | 67         | 99                         |

Table S2. Cont.

| Country                         | Rural Per Capita<br>Multi-Hazard<br>Exposure Rank | Urban Per Capita<br>Multi-Hazard<br>Exposure Rank | Cyclone<br>Rank | Drought<br>Rank | Flood<br>Rank | Multi-Hazard<br>Exposure Rank |
|---------------------------------|---------------------------------------------------|---------------------------------------------------|-----------------|-----------------|---------------|-------------------------------|
| Bermuda                         | N/A                                               | 74                                                | 21              | 193             | 127           | 78                            |
| Bhutan                          | 31                                                | 47                                                | 93              | 21              | 56            | 41                            |
| Bolivia                         | 77                                                | 75                                                | 93              | 101             | 39            | 81                            |
| Bosnia and<br>Herzegovina       | 161                                               | 171                                               | 93              | 170             | 98            | 171                           |
| Botswana                        | 117                                               | 126                                               | 93              | 43              | 138           | 125                           |
| Brazil                          | 101                                               | 83                                                | 93              | 98              | 46            | 87                            |
| British Virgin<br>Islands       | 16                                                | 20                                                | 8               | 45              | 181           | 15                            |
| Brunei                          | 187                                               | 199                                               | 93              | 131             | 172           | 200                           |
| Bulgaria                        | 183                                               | 197                                               | 93              | 153             | 144           | 198                           |
| Burkina Faso                    | 115                                               | 111                                               | 93              | 89              | 94            | 121                           |
| Burundi                         | 80                                                | 116                                               | 93              | 106             | 47            | 91                            |
| Cambodia                        | 26                                                | 54                                                | 86              | 84              | 14            | 37                            |
| Cameroon                        | 163                                               | 158                                               | 93              | 119             | 111           | 165                           |
| Canada                          | 160                                               | 169                                               | 59              | 124             | 139           | 168                           |
| Cape Verde                      | 138                                               | 160                                               | 77              | 76              | 181           | 155                           |
| Cayman<br>Islands               | N/A                                               | 137                                               | 32              | 184             | 181           | 135                           |
| Central<br>African<br>Republic  | 144                                               | 128                                               | 93              | 116             | 90            | 145                           |
| Chad                            | 104                                               | 123                                               | 93              | 61              | 105           | 114                           |
| Channel<br>Islands <sup>2</sup> | 191                                               | 184                                               | 70              | 146             | 181           | 197                           |
| Chile                           | 81                                                | 21                                                | 93              | 18              | 37            | 24                            |
| China                           | 54                                                | 49                                                | 49              | 87              | 49            | 52                            |
| Colombia                        | 37                                                | 35                                                | 88              | 55              | 16            | 34                            |
| Comoros <sup>3</sup>            | 123                                               | 146                                               | 39              | 126             | 152           | 134                           |
| Congo,<br>Republic of<br>the    | 154                                               | 155                                               | 93              | 113             | 110           | 159                           |
| Cook Islands                    | 143                                               | 156                                               | 45              | 112             | 181           | 156                           |
| Costa Rica                      | 58                                                | 93                                                | 60              | 107             | 44            | 79                            |
| Côte d'Ivoire                   | 176                                               | 198                                               | 93              | 125             | 155           | 191                           |
| Croatia                         | 182                                               | 194                                               | 93              | 174             | 123           | 194                           |
| Cuba                            | 17                                                | 41                                                | 35              | 97              | 60            | 36                            |
| Cyprus                          | 128                                               | 147                                               | 93              | 51              | 181           | 144                           |
| Czech<br>Republic               | 131                                               | 135                                               | 93              | 193             | 57            | 137                           |

Table S2. Cont.

| Country                                | Rural Per Capita<br>Multi-Hazard<br>Exposure Rank | Urban Per Capita<br>Multi-Hazard<br>Exposure Rank | Cyclone<br>Rank | Drought<br>Rank | Flood<br>Rank | Multi-Hazard<br>Exposure Rank |
|----------------------------------------|---------------------------------------------------|---------------------------------------------------|-----------------|-----------------|---------------|-------------------------------|
| Democratic<br>Republic of<br>the Congo | 157                                               | 150                                               | 93              | 121             | 108           | 162                           |
| Denmark                                | 185                                               | 201                                               | 93              | 145             | 181           | 202                           |
| Djibouti                               | 64                                                | 69                                                | 93              | 7               | 150           | 70                            |
| Dominica                               | 24                                                | 38                                                | 19              | 70              | 135           | 33                            |
| Dominican<br>Republic                  | 12                                                | 31                                                | 30              | 154             | 24            | 21                            |
| Ecuador                                | 14                                                | 12                                                | 93              | 27              | 17            | 12                            |
| Egypt                                  | 199                                               | 204                                               | 93              | 193             | 153           | 207                           |
| El Salvador                            | 66                                                | 70                                                | 85              | 183             | 9             | 71                            |
| Equatorial<br>Guinea                   | 197                                               | 196                                               | 93              | 147             | 181           | 203                           |
| Eritrea                                | 71                                                | 85                                                | 93              | 13              | 149           | 83                            |
| Estonia                                | 202                                               | 210                                               | 93              | 187             | 181           | 211                           |
| Ethiopia                               | 87                                                | 76                                                | 93              | 36              | 107           | 90                            |
| Faeroe<br>Islands                      | 208                                               | 214                                               | 93              | 193             | 181           | 218                           |
| Falkland<br>Islands                    | 206                                               | 214                                               | 93              | 192             | 181           | 216                           |
| Fiji                                   | 30                                                | 28                                                | 23              | 100             | 89            | 30                            |
| Finland <sup>4</sup>                   | 198                                               | 209                                               | 93              | 179             | 181           | 209                           |
| France                                 | 132                                               | 127                                               | 80              | 160             | 54            | 128                           |
| French<br>Guiana                       | 208                                               | 214                                               | 93              | 193             | 181           | 218                           |
| French<br>Polynesia                    | 146                                               | 119                                               | 34              | 163             | 181           | 136                           |
| Gabon                                  | 184                                               | 193                                               | 93              | 143             | 157           | 196                           |
| Gambia                                 | 140                                               | 154                                               | 93              | 63              | 181           | 153                           |
| Georgia                                | 150                                               | 157                                               | 93              | 171             | 82            | 157                           |
| Germany                                | 111                                               | 115                                               | 93              | 155             | 43            | 116                           |
| Ghana                                  | 152                                               | 159                                               | 93              | 127             | 100           | 161                           |
| Gibraltar                              | N/A                                               | 61                                                | 93              | 1               | 181           | 62                            |
| Greece                                 | 110                                               | 82                                                | 93              | 38              | 106           | 98                            |
| Greenland                              | 200                                               | 206                                               | 93              | 158             | 181           | 206                           |
| Grenada                                | 181                                               | 162                                               | 44              | 193             | 181           | 178                           |
| Guadeloupe <sup>5</sup>                | 7                                                 | 10                                                | 17              | 65              | 83            | 9                             |
| Guam                                   | 8                                                 | 14                                                | 1               | 68              | 132           | 10                            |
| Guatemala                              | 2                                                 | 4                                                 | 63              | 10              | 5             | 4                             |
| Guinea                                 | 162                                               | 138                                               | 93              | 85              | 163           | 160                           |
| Guinea-<br>Bissau                      | 158                                               | 174                                               | 93              | 96              | 181           | 173                           |

Table S2. Cont.

| Country                | Rural Per Capita<br>Multi-Hazard<br>Exposure Rank | Urban Per Capita<br>Multi-Hazard<br>Exposure Rank | Cyclone<br>Rank | Drought<br>Rank | Flood<br>Rank | Multi-Hazard<br>Exposure Rank |
|------------------------|---------------------------------------------------|---------------------------------------------------|-----------------|-----------------|---------------|-------------------------------|
| Guyana                 | 174                                               | 176                                               | 93              | 111             | 162           | 180                           |
| Haiti                  | 32                                                | 23                                                | 38              | 151             | 13            | 26                            |
| Honduras               | 52                                                | 55                                                | 56              | 148             | 10            | 55                            |
| Hong Kong <sup>6</sup> | N/A                                               | 2                                                 | 5               | 139             | 3             | 1                             |
| Hungary                | 145                                               | 165                                               | 93              | 168             | 85            | 163                           |
| Iceland                | 208                                               | 214                                               | 93              | 193             | 181           | 218                           |
| India                  | 27                                                | 29                                                | 68              | 25              | 41            | 31                            |
| Indonesia              | 51                                                | 45                                                | 83              | 60              | 27            | 50                            |
| Iran                   | 38                                                | 43                                                | 93              | 24              | 50            | 43                            |
| Iraq                   | 82                                                | 96                                                | 93              | 17              | 146           | 96                            |
| Ireland                | 180                                               | 167                                               | 64              | 185             | 113           | 174                           |
| Isle of Man            | 208                                               | 214                                               | 93              | 193             | 181           | 218                           |
| Israel                 | 61                                                | 97                                                | 93              | 86              | 70            | 92                            |
| Italy                  | 141                                               | 151                                               | 93              | 144             | 84            | 152                           |
| Jamaica                | 39                                                | 40                                                | 48              | 166             | 4             | 44                            |
| Japan                  | 29                                                | 19                                                | 7               | 182             | 64            | 14                            |
| Jordan                 | 40                                                | 48                                                | 93              | 8               | 95            | 49                            |
| Kazakhstan             | 139                                               | 143                                               | 93              | 58              | 154           | 148                           |
| Kenya                  | 46                                                | 50                                                | 93              | 91              | 18            | 51                            |
| Kiribati               | 97                                                | 107                                               | 93              | 19              | 181           | 108                           |
| Kuwait                 | 194                                               | 212                                               | 93              | 188             | 175           | 212                           |
| Kyrgyzstan             | 126                                               | 130                                               | 93              | 53              | 137           | 133                           |
| Laos                   | 21                                                | 37                                                | 42              | 39              | 55            | 29                            |
| Latvia                 | 207                                               | 213                                               | 93              | 191             | 181           | 215                           |
| Lebanon                | 11                                                | 13                                                | 93              | 2               | 42            | 11                            |
| Lesotho                | 48                                                | 80                                                | 93              | 16              | 99            | 57                            |
| Liberia                | 190                                               | 186                                               | 93              | 123             | 170           | 193                           |
| Libya                  | 142                                               | 149                                               | 93              | 57              | 180           | 150                           |
| Liechtenstein          | 65                                                | 98                                                | 93              | 193             | 7             | 73                            |
| Lithuania              | 201                                               | 208                                               | 93              | 193             | 165           | 210                           |
| Luxembourg             | 86                                                | 94                                                | 93              | 186             | 25            | 97                            |
| Macao <sup>6</sup>     | N/A                                               | 3                                                 | 10              | 132             | 1             | 3                             |
| Macedonia              | 135                                               | 148                                               | 93              | 173             | 66            | 149                           |
| Madagascar             | 22                                                | 17                                                | 12              | 102             | 96            | 23                            |
| Malawi                 | 34                                                | 36                                                | 61              | 20              | 68            | 42                            |
| Malaysia               | 103                                               | 103                                               | 93              | 161             | 32            | 109                           |
| Maldives               | 208                                               | 214                                               | 93              | 193             | 181           | 218                           |
| Mali                   | 134                                               | 136                                               | 93              | 81              | 122           | 142                           |
| Malta                  | 67                                                | 71                                                | 93              | 2               | 181           | 73                            |
| Marshall<br>Islands    | 208                                               | 214                                               | 93              | 193             | 181           | 218                           |
| Martinique             | 147                                               | 191                                               | 51              | 193             | 160           | 188                           |

Table S2. Cont.

| Country                               | Rural Per Capita<br>Multi-Hazard<br>Exposure Rank | Urban Per Capita<br>Multi-Hazard<br>Exposure Rank | Cyclone<br>Rank | Drought<br>Rank | Flood<br>Rank | Multi-Hazard<br>Exposure Rank |
|---------------------------------------|---------------------------------------------------|---------------------------------------------------|-----------------|-----------------|---------------|-------------------------------|
| Mauritania                            | 177                                               | 178                                               | 93              | 115             | 158           | 184                           |
| Mauritius                             | 56                                                | 60                                                | 4               | 169             | 181           | 61                            |
| Mexico                                | 41                                                | 46                                                | 57              | 40              | 52            | 47                            |
| Micronesia,<br>Federated<br>States of | 55                                                | 56                                                | 28              | 67              | 181           | 58                            |
| Moldova,<br>Republic of               | 159                                               | 170                                               | 93              | 122             | 117           | 169                           |
| Monaco                                | N/A                                               | 141                                               | 93              | 132             | 77            | 140                           |
| Mongolia                              | 192                                               | 163                                               | 93              | 99              | 169           | 175                           |
| Montenegro                            | 169                                               | 173                                               | 93              | 193             | 104           | 176                           |
| Montserrat                            | 45                                                | 5                                                 | 15              | 68              | 181           | 38                            |
| Morocco <sup>7</sup>                  | 83                                                | 77                                                | 93              | 22              | 118           | 84                            |
| Mozambique                            | 19                                                | 22                                                | 40              | 31              | 73            | 20                            |
| Myanmar                               | 62                                                | 65                                                | 72              | 9               | 136           | 65                            |
| Namibia                               | 124                                               | 120                                               | 93              | 33              | 179           | 127                           |
| Nauru                                 | N/A                                               | 72                                                | 93              | 2               | 181           | 73                            |
| Nepal                                 | 10                                                | 11                                                | 93              | 44              | 6             | 13                            |
| Netherlands                           | 151                                               | 164                                               | 93              | 150             | 97            | 166                           |
| Netherlands<br>Antilles               | 119                                               | 118                                               | 46              | 59              | 168           | 117                           |
| New<br>Caledonia                      | 18                                                | 25                                                | 6               | 66              | 166           | 19                            |
| New Zealand                           | 156                                               | 139                                               | 74              | 175             | 65            | 143                           |
| Nicaragua                             | 36                                                | 18                                                | 52              | 49              | 29            | 27                            |
| Niger                                 | 50                                                | 52                                                | 93              | 75              | 28            | 53                            |
| Nigeria                               | 92                                                | 91                                                | 93              | 54              | 86            | 94                            |
| Niue                                  | 89                                                | 117                                               | 33              | 109             | 181           | 107                           |
| North Korea <sup>8</sup>              | 47                                                | 59                                                | 37              | 105             | 79            | 56                            |
| Northern<br>Mariana<br>Islands        | 23                                                | 42                                                | 2               | 104             | 181           | 40                            |
| Norway                                | 195                                               | 203                                               | 93              | 149             | 167           | 205                           |
| Oman                                  | 196                                               | 207                                               | 93              | 177             | 164           | 208                           |
| Pakistan                              | 33                                                | 32                                                | 76              | 14              | 51            | 28                            |
| Palau                                 | 125                                               | 142                                               | 55              | 72              | 181           | 138                           |
| Palestine                             | 35                                                | 86                                                | 93              | 37              | 80            | 68                            |
| Panama                                | 137                                               | 145                                               | 87              | 156             | 72            | 147                           |
| Papua New<br>Guinea                   | 168                                               | 181                                               | 84              | 117             | 159           | 183                           |
| Paraguay                              | 68                                                | 67                                                | 93              | 138             | 21            | 72                            |
| Peru                                  | 73                                                | 88                                                | 93              | 114             | 35            | 86                            |

Table S2. Cont.

| Country                                | Rural Per Capita<br>Multi-Hazard<br>Exposure Rank | Urban Per Capita<br>Multi-Hazard<br>Exposure Rank | Cyclone<br>Rank | Drought<br>Rank | Flood<br>Rank | Multi-Hazard<br>Exposure Rank |
|----------------------------------------|---------------------------------------------------|---------------------------------------------------|-----------------|-----------------|---------------|-------------------------------|
| Philippines                            | 1                                                 | 1                                                 | 11              | 74              | 22            | 2                             |
| Pitcairn<br>Islands                    | 208                                               | 214                                               | 93              | 193             | 181           | 218                           |
| Poland                                 | 153                                               | 161                                               | 93              | 162             | 88            | 164                           |
| Portugal                               | 91                                                | 101                                               | 82              | 79              | 81            | 102                           |
| Puerto Rico                            | 15                                                | 24                                                | 14              | 193             | 48            | 17                            |
| Qatar                                  | 204                                               | 211                                               | 93              | 193             | 176           | 214                           |
| Réunion                                | 60                                                | 62                                                | 3               | 193             | 181           | 63                            |
| Romania                                | 98                                                | 109                                               | 93              | 159             | 33            | 110                           |
| Russia                                 | 167                                               | 175                                               | 78              | 130             | 126           | 177                           |
| Rwanda                                 | 74                                                | 90                                                | 93              | 180             | 19            | 85                            |
| Saint Helena                           | 208                                               | 214                                               | 93              | 193             | 181           | 218                           |
| Saint Kitts<br>and Nevis               | 6                                                 | 9                                                 | 20              | 6               | 181           | 8                             |
| Saint Lucia                            | 175                                               | 183                                               | 54              | 193             | 147           | 181                           |
| Saint Pierre<br>and Miquelon           | 121                                               | 104                                               | 26              | 193             | 181           | 112                           |
| Saint Vincent<br>and the<br>Grenadines | 170                                               | 153                                               | 41              | 193             | 181           | 167                           |
| Samoa                                  | 148                                               | 166                                               | 47              | 140             | 142           | 158                           |
| San Marino                             | 189                                               | 200                                               | 93              | 193             | 127           | 201                           |
| Sao Tome<br>and Principe               | 208                                               | 214                                               | 93              | 193             | 181           | 218                           |
| Saudi Arabia                           | 186                                               | 190                                               | 93              | 167             | 121           | 192                           |
| Senegal                                | 130                                               | 140                                               | 93              | 62              | 141           | 139                           |
| Serbia                                 | 127                                               | 132                                               | 93              | 176             | 58            | 132                           |
| Seychelles                             | 208                                               | 214                                               | 93              | 193             | 181           | 218                           |
| Sierra Leone                           | 118                                               | 106                                               | 93              | 34              | 148           | 119                           |
| Singapore                              | N/A                                               | 72                                                | 93              | 193             | 7             | 73                            |
| Slovakia                               | 129                                               | 144                                               | 93              | 193             | 63            | 141                           |
| Slovenia                               | 193                                               | 205                                               | 93              | 193             | 143           | 204                           |
| Solomon<br>Islands                     | 155                                               | 192                                               | 50              | 152             | 145           | 170                           |
| Somalia                                | 42                                                | 15                                                | 93              | 15              | 62            | 35                            |
| South Africa                           | 59                                                | 78                                                | 91              | 42              | 78            | 69                            |
| South Korea <sup>9</sup>               | 5                                                 | 6                                                 | 22              | 118             | 15            | 5                             |
| Spain                                  | 108                                               | 124                                               | 89              | 64              | 109           | 122                           |
| Sri Lanka                              | 53                                                | 79                                                | 67              | 135             | 11            | 59                            |
| Sudan <sup>10</sup>                    | 90                                                | 87                                                | 93              | 52              | 91            | 95                            |
| Suriname                               | 203                                               | 214                                               | 93              | 190             | 177           | 213                           |
| Swaziland                              | 28                                                | 53                                                | 81              | 2               | 87            | 39                            |

Table S2. Cont.

| Country                             | Rural Per Capita<br>Multi-Hazard<br>Exposure Rank | Urban Per Capita<br>Multi-Hazard<br>Exposure Rank | Cyclone<br>Rank | Drought<br>Rank | Flood<br>Rank | Multi-Hazard<br>Exposure Rank |
|-------------------------------------|---------------------------------------------------|---------------------------------------------------|-----------------|-----------------|---------------|-------------------------------|
| Sweden                              | 188                                               | 195                                               | 93              | 128             | 173           | 199                           |
| Switzerland                         | 88                                                | 99                                                | 93              | 193             | 26            | 101                           |
| Syria                               | 57                                                | 51                                                | 93              | 11              | 102           | 54                            |
| Tajikistan                          | 25                                                | 33                                                | 93              | 28              | 31            | 32                            |
| Tanzania,<br>United<br>Republic of  | 76                                                | 84                                                | 93              | 78              | 69            | 88                            |
| Thailand                            | 9                                                 | 39                                                | 73              | 35              | 20            | 16                            |
| Timor-Leste                         | 84                                                | 112                                               | 69              | 41              | 112           | 100                           |
| Togo                                | 120                                               | 168                                               | 93              | 103             | 103           | 146                           |
| Tokelau                             | 208                                               | N/A                                               | 93              | 193             | 181           | 218                           |
| Tonga                               | 75                                                | 64                                                | 31              | 88              | 181           | 80                            |
| Trinidad and<br>Tobago              | 106                                               | 121                                               | 79              | 193             | 34            | 113                           |
| Tunisia                             | 109                                               | 129                                               | 93              | 93              | 92            | 126                           |
| Turkey                              | 116                                               | 114                                               | 93              | 77              | 101           | 118                           |
| Turkmenistan                        | 164                                               | 172                                               | 93              | 120             | 120           | 172                           |
| Turks and<br>Caicos<br>Islands      | 85                                                | 102                                               | 25              | 193             | 181           | 104                           |
| Tuvalu                              | 105                                               | 180                                               | 66              | 82              | 181           | 151                           |
| Uganda                              | 96                                                | 95                                                | 93              | 157             | 30            | 105                           |
| Ukraine                             | 173                                               | 187                                               | 93              | 165             | 119           | 187                           |
| United Arab<br>Emirates             | 136                                               | 110                                               | 93              | 26              | 174           | 115                           |
| United<br>Kingdom                   | 78                                                | 68                                                | 65              | 164             | 23            | 77                            |
| United States<br>of America         | 69                                                | 63                                                | 43              | 108             | 59            | 66                            |
| United States<br>Virgin<br>Islands  | 20                                                | 34                                                | 13              | 48              | 171           | 25                            |
| Uruguay                             | 93                                                | 125                                               | 93              | 129             | 61            | 123                           |
| Uzbekistan                          | 100                                               | 92                                                | 93              | 56              | 93            | 103                           |
| Vanuatu                             | 43                                                | 27                                                | 18              | 94              | 124           | 45                            |
| Vatican City<br>State <sup>11</sup> | N/A                                               | 177                                               | 93              | 132             | 127           | 182                           |
| Venezuela                           | 72                                                | 57                                                | 90              | 73              | 38            | 60                            |
| Vietnam                             | 4                                                 | 7                                                 | 36              | 80              | 12            | 7                             |
| Wallis and<br>Futuna<br>Islands     | 70                                                | N/A                                               | 27              | 110             | 181           | 82                            |



Table S2. Cont.

| Country  | Rural Per Capita<br>Multi-Hazard<br>Exposure Rank | Urban Per Capita<br>Multi-Hazard<br>Exposure Rank | Cyclone<br>Rank | Drought<br>Rank | Flood<br>Rank | Multi-Hazard<br>Exposure Rank |
|----------|---------------------------------------------------|---------------------------------------------------|-----------------|-----------------|---------------|-------------------------------|
| Yemen    | 114                                               | 122                                               | 93              | 189             | 40            | 124                           |
| Zambia   | 113                                               | 113                                               | 93              | 30              | 161           | 120                           |
| Zimbabwe | 63                                                | 58                                                | 92              | 12              | 116           | 64                            |

Notes: <sup>1</sup> includes Christmas Island and Cocos islands; <sup>2</sup> includes Guernsey and Jersey; <sup>3</sup> includes Mayotte; <sup>4</sup> includes Aland Islands; <sup>5</sup> includes Saint Barthelemy and Saint Martin; <sup>6</sup> Special Administrative Region (SAR) of China; <sup>7</sup> includes Western Sahara; <sup>8</sup> Democratic People's Republic of Korea; <sup>9</sup> Republic of Korea; <sup>10</sup> includes Southern Sudan; <sup>11</sup> Holy See.

Table S3. Multi-hazard exposure and rank.

| Country                      | Cyclone<br>Rank | Drought<br>Rank | Flood<br>Rank | Multi-Hazard<br>Total Exposure | Multi-Hazard<br>Total Rank |
|------------------------------|-----------------|-----------------|---------------|--------------------------------|----------------------------|
| Hong Kong <sup>1</sup>       | 5               | 139             | 3             | 2.085                          | 1                          |
| Philippines                  | 11              | 74              | 22            | 2.068                          | 2                          |
| Macao <sup>1</sup>           | 10              | 132             | 1             | 1.995                          | 3                          |
| Guatemala                    | 63              | 10              | 5             | 1.872                          | 4                          |
| South Korea <sup>2</sup>     | 22              | 118             | 15            | 1.807                          | 5                          |
| Bangladesh                   | 53              | 29              | 2             | 1.779                          | 6                          |
| Vietnam                      | 36              | 80              | 12            | 1.735                          | 7                          |
| Saint Kitts and Nevis        | 20              | 6               | 181           | 1.700                          | 8                          |
| Guadeloupe <sup>3</sup>      | 17              | 65              | 83            | 1.591                          | 9                          |
| Guam                         | 1               | 68              | 132           | 1.500                          | 10                         |
| Lebanon                      | 93              | 2               | 42            | 1.500                          | 11                         |
| Ecuador                      | 93              | 27              | 17            | 1.487                          | 12                         |
| Nepal                        | 93              | 44              | 6             | 1.470                          | 13                         |
| Japan                        | 7               | 182             | 64            | 1.430                          | 14                         |
| British Virgin Islands       | 8               | 45              | 181           | 1.413                          | 15                         |
| Thailand                     | 73              | 35              | 20            | 1.401                          | 16                         |
| Puerto Rico                  | 14              | 193             | 48            | 1.400                          | 17                         |
| Antigua and Barbuda          | 9               | 70              | 134           | 1.399                          | 18                         |
| New Caledonia                | 6               | 66              | 166           | 1.389                          | 19                         |
| Mozambique                   | 40              | 31              | 73            | 1.388                          | 20                         |
| Dominican Republic           | 30              | 154             | 24            | 1.388                          | 21                         |
| Anguilla                     | 16              | 45              | 151           | 1.376                          | 22                         |
| Madagascar                   | 12              | 102             | 96            | 1.372                          | 23                         |
| Chile                        | 93              | 18              | 37            | 1.352                          | 24                         |
| United States Virgin Islands | 13              | 48              | 171           | 1.350                          | 25                         |
| Haiti                        | 38              | 151             | 13            | 1.335                          | 26                         |
| Nicaragua                    | 52              | 49              | 29            | 1.333                          | 27                         |
| Pakistan                     | 76              | 14              | 51            | 1.330                          | 28                         |
| Laos                         | 42              | 39              | 55            | 1.328                          | 29                         |

Table S3. Cont.

| Country                         | Cyclone Rank | Drought Rank | Flood Rank | Multi-Hazard Total Exposure | Multi-Hazard Total Rank |
|---------------------------------|--------------|--------------|------------|-----------------------------|-------------------------|
| Fiji                            | 23           | 100          | 89         | 1.323                       | 30                      |
| India                           | 68           | 25           | 41         | 1.310                       | 31                      |
| Tajikistan                      | 93           | 28           | 31         | 1.308                       | 32                      |
| Dominica                        | 19           | 70           | 135        | 1.296                       | 33                      |
| Colombia                        | 88           | 55           | 16         | 1.295                       | 34                      |
| Somalia                         | 93           | 15           | 62         | 1.272                       | 35                      |
| Cuba                            | 35           | 97           | 60         | 1.266                       | 36                      |
| Cambodia                        | 86           | 84           | 14         | 1.244                       | 37                      |
| Montserrat                      | 15           | 68           | 181        | 1.239                       | 38                      |
| Swaziland                       | 81           | 2            | 87         | 1.230                       | 39                      |
| Northern Mariana Islands        | 2            | 104          | 181        | 1.229                       | 40                      |
| Bhutan                          | 93           | 21           | 56         | 1.228                       | 41                      |
| Malawi                          | 61           | 20           | 68         | 1.221                       | 42                      |
| Iran                            | 93           | 24           | 50         | 1.205                       | 43                      |
| Jamaica                         | 48           | 166          | 4          | 1.198                       | 44                      |
| Vanuatu                         | 18           | 94           | 124        | 1.193                       | 45                      |
| Afghanistan                     | 93           | 32           | 45         | 1.178                       | 46                      |
| Mexico                          | 57           | 40           | 52         | 1.169                       | 47                      |
| Belize                          | 24           | 193          | 76         | 1.161                       | 48                      |
| Jordan                          | 93           | 8            | 95         | 1.155                       | 49                      |
| Indonesia                       | 83           | 60           | 27         | 1.132                       | 50                      |
| Kenya                           | 93           | 91           | 18         | 1.127                       | 51                      |
| China                           | 49           | 87           | 49         | 1.097                       | 52                      |
| Niger                           | 93           | 75           | 28         | 1.084                       | 53                      |
| Syria                           | 93           | 11           | 102        | 1.081                       | 54                      |
| Honduras                        | 56           | 148          | 10         | 1.076                       | 55                      |
| North Korea <sup>4</sup>        | 37           | 105          | 79         | 1.048                       | 56                      |
| Lesotho                         | 93           | 16           | 99         | 1.036                       | 57                      |
| Micronesia, Federated States of | 28           | 67           | 181        | 1.036                       | 58                      |
| Sri Lanka                       | 67           | 135          | 11         | 1.031                       | 59                      |
| Venezuela                       | 90           | 73           | 38         | 1.024                       | 60                      |
| Mauritius                       | 4            | 169          | 181        | 1.017                       | 61                      |
| Gibraltar                       | 93           | 1            | 181        | 1.000                       | 62                      |
| Réunion                         | 3            | 193          | 181        | 0.995                       | 63                      |
| Zimbabwe                        | 92           | 12           | 116        | 0.984                       | 64                      |
| Myanmar                         | 72           | 9            | 136        | 0.968                       | 65                      |
| United States of America        | 43           | 108          | 59         | 0.964                       | 66                      |
| Argentina                       | 93           | 92           | 36         | 0.941                       | 67                      |
| Palestine                       | 93           | 37           | 80         | 0.919                       | 68                      |
| South Africa                    | 91           | 42           | 78         | 0.918                       | 69                      |
| Djibouti                        | 93           | 7            | 150        | 0.915                       | 70                      |
| El Salvador                     | 85           | 183          | 9          | 0.912                       | 71                      |
| Paraguay                        | 93           | 138          | 21         | 0.902                       | 72                      |

Table S3. Cont.

| Country                      | Cyclone Rank | Drought Rank | Flood Rank | Multi-Hazard Total Exposure | Multi-Hazard Total Rank |
|------------------------------|--------------|--------------|------------|-----------------------------|-------------------------|
| Liechtenstein                | 93           | 193          | 7          | 0.900                       | 73                      |
| Malta                        | 93           | 2            | 181        | 0.900                       | 73                      |
| Nauru                        | 93           | 2            | 181        | 0.900                       | 73                      |
| Singapore                    | 93           | 193          | 7          | 0.900                       | 73                      |
| United Kingdom               | 65           | 164          | 23         | 0.890                       | 77                      |
| Bermuda                      | 21           | 193          | 127        | 0.884                       | 78                      |
| Costa Rica                   | 60           | 107          | 44         | 0.879                       | 79                      |
| Tonga                        | 31           | 88           | 181        | 0.864                       | 80                      |
| Bolivia                      | 93           | 101          | 39         | 0.858                       | 81                      |
| Wallis and Futuna Islands    | 27           | 110          | 181        | 0.847                       | 82                      |
| Eritrea                      | 93           | 13           | 149        | 0.837                       | 83                      |
| Morocco <sup>5</sup>         | 93           | 22           | 118        | 0.834                       | 84                      |
| Rwanda                       | 93           | 180          | 19         | 0.830                       | 85                      |
| Peru                         | 93           | 114          | 35         | 0.825                       | 86                      |
| Brazil                       | 93           | 98           | 46         | 0.824                       | 87                      |
| Tanzania, United Republic of | 93           | 78           | 69         | 0.820                       | 88                      |
| Algeria                      | 93           | 83           | 71         | 0.794                       | 89                      |
| Ethiopia                     | 93           | 36           | 107        | 0.785                       | 90                      |
| Burundi                      | 93           | 106          | 47         | 0.783                       | 91                      |
| Israel                       | 93           | 86           | 70         | 0.776                       | 92                      |
| Angola                       | 93           | 23           | 125        | 0.775                       | 93                      |
| Nigeria                      | 93           | 54           | 86         | 0.774                       | 94                      |
| Sudan <sup>6</sup>           | 93           | 52           | 91         | 0.772                       | 95                      |
| Iraq                         | 93           | 17           | 146        | 0.772                       | 96                      |
| Luxembourg                   | 93           | 186          | 25         | 0.770                       | 97                      |
| Greece                       | 93           | 38           | 106        | 0.764                       | 98                      |
| Benin                        | 93           | 90           | 67         | 0.754                       | 99                      |
| Timor-Leste                  | 69           | 41           | 112        | 0.753                       | 100                     |
| Switzerland                  | 93           | 193          | 26         | 0.751                       | 101                     |
| Portugal                     | 82           | 79           | 81         | 0.744                       | 102                     |
| Uzbekistan                   | 93           | 56           | 93         | 0.741                       | 103                     |
| Turks and Caicos Islands     | 25           | 193          | 181        | 0.731                       | 104                     |
| Uganda                       | 93           | 157          | 30         | 0.730                       | 105                     |
| Australia <sup>7</sup>       | 71           | 95           | 74         | 0.717                       | 106                     |
| Niue                         | 33           | 109          | 181        | 0.715                       | 107                     |
| Kiribati                     | 93           | 19           | 181        | 0.708                       | 108                     |
| Malaysia                     | 93           | 161          | 32         | 0.706                       | 109                     |
| Romania                      | 93           | 159          | 33         | 0.704                       | 110                     |
| Barbados                     | 58           | 45           | 133        | 0.699                       | 111                     |
| Saint Pierre and Miquelon    | 26           | 193          | 181        | 0.699                       | 112                     |
| Trinidad and Tobago          | 79           | 193          | 34         | 0.661                       | 113                     |
| Chad                         | 93           | 61           | 105        | 0.659                       | 114                     |
| United Arab Emirates         | 93           | 26           | 174        | 0.653                       | 115                     |

Table S3. Cont.

| Country                  | Cyclone Rank | Drought Rank | Flood Rank | Multi-Hazard Total Exposure | Multi-Hazard Total Rank |
|--------------------------|--------------|--------------|------------|-----------------------------|-------------------------|
| Germany                  | 93           | 155          | 43         | 0.648                       | 116                     |
| Netherlands Antilles     | 46           | 59           | 168        | 0.647                       | 117                     |
| Turkey                   | 93           | 77           | 101        | 0.643                       | 118                     |
| Sierra Leone             | 93           | 34           | 148        | 0.638                       | 119                     |
| Zambia                   | 93           | 30           | 161        | 0.636                       | 120                     |
| Burkina Faso             | 93           | 89           | 94         | 0.627                       | 121                     |
| Spain                    | 89           | 64           | 109        | 0.624                       | 122                     |
| Uruguay                  | 93           | 129          | 61         | 0.614                       | 123                     |
| Yemen                    | 93           | 189          | 40         | 0.612                       | 124                     |
| Botswana                 | 93           | 43           | 138        | 0.598                       | 125                     |
| Tunisia                  | 93           | 93           | 92         | 0.596                       | 126                     |
| Namibia                  | 93           | 33           | 179        | 0.592                       | 127                     |
| France                   | 80           | 160          | 54         | 0.579                       | 128                     |
| Bahamas                  | 29           | 181          | 181        | 0.574                       | 129                     |
| Azerbaijan               | 93           | 50           | 140        | 0.563                       | 130                     |
| Belgium                  | 93           | 172          | 53         | 0.557                       | 131                     |
| Serbia                   | 93           | 176          | 58         | 0.540                       | 132                     |
| Kyrgyzstan               | 93           | 53           | 137        | 0.539                       | 133                     |
| Comoros <sup>8</sup>     | 39           | 126          | 152        | 0.538                       | 134                     |
| Cayman Islands           | 32           | 184          | 181        | 0.530                       | 135                     |
| French Polynesia         | 34           | 163          | 181        | 0.530                       | 136                     |
| Czech Republic           | 93           | 193          | 57         | 0.528                       | 137                     |
| Palau                    | 55           | 72           | 181        | 0.519                       | 138                     |
| Senegal                  | 93           | 62           | 141        | 0.500                       | 139                     |
| Monaco                   | 93           | 132          | 77         | 0.500                       | 140                     |
| Slovakia                 | 93           | 193          | 63         | 0.493                       | 141                     |
| Mali                     | 93           | 81           | 122        | 0.493                       | 142                     |
| New Zealand              | 74           | 175          | 65         | 0.486                       | 143                     |
| Cyprus                   | 93           | 51           | 181        | 0.485                       | 144                     |
| Central African Republic | 93           | 116          | 90         | 0.482                       | 145                     |
| Togo                     | 93           | 103          | 103        | 0.477                       | 146                     |
| Panama                   | 87           | 156          | 72         | 0.475                       | 147                     |
| Kazakhstan               | 93           | 58           | 154        | 0.468                       | 148                     |
| Macedonia                | 93           | 173          | 66         | 0.459                       | 149                     |
| Libya                    | 93           | 57           | 180        | 0.435                       | 150                     |
| Tuvalu                   | 66           | 82           | 181        | 0.428                       | 151                     |
| Italy                    | 93           | 144          | 84         | 0.428                       | 152                     |
| Gambia                   | 93           | 63           | 181        | 0.422                       | 153                     |
| Austria                  | 93           | 193          | 75         | 0.410                       | 154                     |
| Cape Verde               | 77           | 76           | 181        | 0.402                       | 155                     |
| Cook Islands             | 45           | 112          | 181        | 0.398                       | 156                     |
| Georgia                  | 93           | 171          | 82         | 0.378                       | 157                     |
| Samoa                    | 47           | 140          | 142        | 0.375                       | 158                     |

Table S3. Cont.

| Country                          | Cyclone Rank | Drought Rank | Flood Rank | Multi-Hazard Total Exposure | Multi-Hazard Total Rank |
|----------------------------------|--------------|--------------|------------|-----------------------------|-------------------------|
| Congo, Republic of the           | 93           | 113          | 110        | 0.375                       | 159                     |
| Guinea                           | 93           | 85           | 163        | 0.374                       | 160                     |
| Ghana                            | 93           | 127          | 100        | 0.372                       | 161                     |
| Democratic Republic of the Congo | 93           | 121          | 108        | 0.351                       | 162                     |
| Hungary                          | 93           | 168          | 85         | 0.350                       | 163                     |
| Poland                           | 93           | 162          | 88         | 0.348                       | 164                     |
| Cameroon                         | 93           | 119          | 111        | 0.337                       | 165                     |
| Netherlands                      | 93           | 150          | 97         | 0.333                       | 166                     |
| Saint Vincent and the Grenadines | 41           | 193          | 181        | 0.316                       | 167                     |
| Canada                           | 59           | 124          | 139        | 0.302                       | 168                     |
| Moldova, Republic of             | 93           | 122          | 117        | 0.300                       | 169                     |
| Solomon Islands                  | 50           | 152          | 145        | 0.293                       | 170                     |
| Bosnia and Herzegovina           | 93           | 170          | 98         | 0.293                       | 171                     |
| Turkmenistan                     | 93           | 120          | 120        | 0.270                       | 172                     |
| Guinea-Bissau                    | 93           | 96           | 181        | 0.267                       | 173                     |
| Ireland                          | 64           | 185          | 113        | 0.262                       | 174                     |
| Mongolia                         | 93           | 99           | 169        | 0.252                       | 175                     |
| Montenegro                       | 93           | 193          | 104        | 0.240                       | 176                     |
| Russia                           | 78           | 130          | 126        | 0.222                       | 177                     |
| Grenada                          | 44           | 193          | 181        | 0.220                       | 178                     |
| Aruba                            | 75           | 142          | 131        | 0.210                       | 179                     |
| Guyana                           | 93           | 111          | 162        | 0.210                       | 180                     |
| Saint Lucia                      | 54           | 193          | 147        | 0.203                       | 181                     |
| Vatican City State <sup>9</sup>  | 93           | 132          | 127        | 0.200                       | 182                     |
| Papua New Guinea                 | 84           | 117          | 159        | 0.198                       | 183                     |
| Mauritania                       | 93           | 115          | 158        | 0.195                       | 184                     |
| Andorra                          | 93           | 141          | 127        | 0.193                       | 185                     |
| Albania                          | 93           | 178          | 114        | 0.187                       | 186                     |
| Ukraine                          | 93           | 165          | 119        | 0.179                       | 187                     |
| Martinique                       | 51           | 193          | 160        | 0.179                       | 188                     |
| American Samoa                   | 62           | 136          | 181        | 0.178                       | 189                     |
| Belarus                          | 93           | 193          | 115        | 0.173                       | 190                     |
| Côte d'Ivoire                    | 93           | 125          | 155        | 0.152                       | 191                     |
| Saudi Arabia                     | 93           | 167          | 121        | 0.147                       | 192                     |
| Liberia                          | 93           | 123          | 170        | 0.132                       | 193                     |
| Croatia                          | 93           | 174          | 123        | 0.130                       | 194                     |
| Armenia                          | 93           | 137          | 156        | 0.129                       | 195                     |
| Gabon                            | 93           | 143          | 157        | 0.122                       | 196                     |
| Channel Islands <sup>10</sup>    | 70           | 146          | 181        | 0.121                       | 197                     |
| Bulgaria                         | 93           | 153          | 144        | 0.119                       | 198                     |
| Sweden                           | 93           | 128          | 173        | 0.114                       | 199                     |
| Brunei                           | 93           | 131          | 172        | 0.105                       | 200                     |
| San Marino                       | 93           | 193          | 127        | 0.100                       | 201                     |

Table S3. Cont.

| Country               | Cyclone Rank | Drought Rank | Flood Rank | Multi-Hazard Total Exposure | Multi-Hazard Total Rank |
|-----------------------|--------------|--------------|------------|-----------------------------|-------------------------|
| Denmark               | 93           | 145          | 181        | 0.085                       | 202                     |
| Equatorial Guinea     | 93           | 147          | 181        | 0.068                       | 203                     |
| Slovenia              | 93           | 193          | 143        | 0.067                       | 204                     |
| Norway                | 93           | 149          | 167        | 0.063                       | 205                     |
| Greenland             | 93           | 158          | 181        | 0.044                       | 206                     |
| Egypt                 | 93           | 193          | 153        | 0.037                       | 207                     |
| Oman                  | 93           | 177          | 164        | 0.026                       | 208                     |
| Finland <sup>11</sup> | 93           | 179          | 181        | 0.013                       | 209                     |
| Lithuania             | 93           | 193          | 165        | 0.011                       | 210                     |
| Estonia               | 93           | 187          | 181        | 0.001                       | 211                     |
| Kuwait                | 93           | 188          | 175        | 0.001                       | 212                     |
| Suriname              | 93           | 190          | 177        | 0.001                       | 213                     |
| Qatar                 | 93           | 193          | 176        | 0.000                       | 214                     |
| Latvia                | 93           | 191          | 181        | 0.000                       | 215                     |
| Falkland Islands      | 93           | 192          | 181        | 0.000                       | 216                     |
| Bahrain               | 93           | 193          | 178        | 0.000                       | 217                     |
| Faeroe Islands        | 93           | 193          | 181        | 0.000                       | 218                     |
| French Guiana         | 93           | 193          | 181        | 0.000                       | 218                     |
| Iceland               | 93           | 193          | 181        | 0.000                       | 218                     |
| Isle of Man           | 93           | 193          | 181        | 0.000                       | 218                     |
| Maldives              | 93           | 193          | 181        | 0.000                       | 218                     |
| Marshall Islands      | 93           | 193          | 181        | 0.000                       | 218                     |
| Pitcairn Islands      | 93           | 193          | 181        | 0.000                       | 218                     |
| Saint Helena          | 93           | 193          | 181        | 0.000                       | 218                     |
| Sao Tome and Principe | 93           | 193          | 181        | 0.000                       | 218                     |
| Seychelles            | 93           | 193          | 181        | 0.000                       | 218                     |
| Tokelau               | 93           | 193          | 181        | 0.000                       | 218                     |

Notes: <sup>1</sup> Special Administrative Region (SAR) of China; <sup>2</sup> Republic of Korea; <sup>3</sup> includes Saint Barthelemy and Saint Martin; ; <sup>4</sup> Democratic People's Republic of Korea; <sup>5</sup> includes Western Sahara; <sup>6</sup> includes Southern Sudan; <sup>7</sup> includes Christmas Island and Cocos islands; <sup>8</sup> includes Mayotte; <sup>9</sup> Holy See; <sup>10</sup> includes Guernsey and Jersey; <sup>11</sup> includes Aland Islands.

Table S4. Cyclone exposure and rank.

| Country                  | Cyclone Exposure | Cyclone Rank |
|--------------------------|------------------|--------------|
| Guam                     | 1.000            | 1            |
| Northern Mariana Islands | 1.000            | 2            |
| Réunion                  | 0.995            | 3            |
| Mauritius                | 0.993            | 4            |
| Hong Kong <sup>1</sup>   | 0.993            | 5            |
| New Caledonia            | 0.976            | 6            |
| Japan                    | 0.975            | 7            |
| British Virgin Islands   | 0.913            | 8            |

Table S4. Cont.

| Country                          | Cyclone Exposure | Cyclone Rank |
|----------------------------------|------------------|--------------|
| Antigua and Barbuda              | 0.900            | 9            |
| Macao <sup>1</sup>               | 0.895            | 10           |
| Philippines                      | 0.870            | 11           |
| Madagascar                       | 0.852            | 12           |
| United States Virgin Islands     | 0.850            | 13           |
| Puerto Rico                      | 0.842            | 14           |
| Montserrat                       | 0.839            | 15           |
| Anguilla                         | 0.839            | 16           |
| Guadeloupe <sup>2</sup>          | 0.829            | 17           |
| Vanuatu                          | 0.807            | 18           |
| Dominica                         | 0.800            | 19           |
| Saint Kitts and Nevis            | 0.800            | 20           |
| Bermuda                          | 0.784            | 21           |
| South Korea <sup>3</sup>         | 0.780            | 22           |
| Fiji                             | 0.763            | 23           |
| Belize                           | 0.756            | 24           |
| Turks and Caicos Islands         | 0.731            | 25           |
| Saint Pierre and Miquelon        | 0.699            | 26           |
| Wallis and Futuna Islands        | 0.647            | 27           |
| Micronesia, Federated States of  | 0.636            | 28           |
| Bahamas                          | 0.564            | 29           |
| Dominican Republic               | 0.543            | 30           |
| Tonga                            | 0.526            | 31           |
| Cayman Islands                   | 0.526            | 32           |
| Niue                             | 0.515            | 33           |
| French Polynesia                 | 0.498            | 34           |
| Cuba                             | 0.490            | 35           |
| Vietnam                          | 0.478            | 36           |
| North Korea <sup>4</sup>         | 0.444            | 37           |
| Haiti                            | 0.403            | 38           |
| Comoros <sup>5</sup>             | 0.385            | 39           |
| Mozambique                       | 0.355            | 40           |
| Saint Vincent and the Grenadines | 0.316            | 41           |
| Laos                             | 0.267            | 42           |
| United States of America         | 0.237            | 43           |
| Grenada                          | 0.220            | 44           |
| Cook Islands                     | 0.219            | 45           |
| Netherlands Antilles             | 0.219            | 46           |
| Samoa                            | 0.215            | 47           |
| Jamaica                          | 0.204            | 48           |
| China                            | 0.202            | 49           |
| Solomon Islands                  | 0.180            | 50           |
| Martinique                       | 0.159            | 51           |
| Nicaragua                        | 0.156            | 52           |

Table S4. Cont.

| Country                      | Cyclone Exposure | Cyclone Rank |
|------------------------------|------------------|--------------|
| Bangladesh                   | 0.154            | 53           |
| Saint Lucia                  | 0.153            | 54           |
| Palau                        | 0.122            | 55           |
| Honduras                     | 0.114            | 56           |
| Mexico                       | 0.102            | 57           |
| Barbados                     | 0.100            | 58           |
| Canada                       | 0.099            | 59           |
| Costa Rica                   | 0.094            | 60           |
| Malawi                       | 0.081            | 61           |
| American Samoa               | 0.080            | 62           |
| Guatemala                    | 0.076            | 63           |
| Ireland                      | 0.074            | 64           |
| United Kingdom               | 0.062            | 65           |
| Tuvalu                       | 0.052            | 66           |
| Sri Lanka                    | 0.051            | 67           |
| India                        | 0.049            | 68           |
| Timor-Leste                  | 0.045            | 69           |
| Channel Islands <sup>6</sup> | 0.041            | 70           |
| Australia <sup>7</sup>       | 0.032            | 71           |
| Myanmar                      | 0.031            | 72           |
| Thailand                     | 0.027            | 73           |
| New Zealand                  | 0.023            | 74           |
| Aruba                        | 0.020            | 75           |
| Pakistan                     | 0.012            | 76           |
| Cape Verde                   | 0.012            | 77           |
| Russia                       | 0.010            | 78           |
| Trinidad and Tobago          | 0.008            | 79           |
| France                       | 0.008            | 80           |
| Swaziland                    | 0.007            | 81           |
| Portugal                     | 0.007            | 82           |
| Indonesia                    | 0.006            | 83           |
| Papua New Guinea             | 0.005            | 84           |
| El Salvador                  | 0.005            | 85           |
| Cambodia                     | 0.005            | 86           |
| Panama                       | 0.002            | 87           |
| Colombia                     | 0.001            | 88           |
| Spain                        | 0.001            | 89           |
| Venezuela                    | 0.001            | 90           |
| South Africa                 | 0.000            | 91           |
| Zimbabwe                     | 0.000            | 92           |
| Afghanistan                  | 0.000            | 93           |
| Albania                      | 0.000            | 93           |
| Algeria                      | 0.000            | 93           |
| Andorra                      | 0.000            | 93           |



Table S4. Cont.

| Country                          | Cyclone Exposure | Cyclone Rank |
|----------------------------------|------------------|--------------|
| Angola                           | 0.000            | 93           |
| Argentina                        | 0.000            | 93           |
| Armenia                          | 0.000            | 93           |
| Austria                          | 0.000            | 93           |
| Azerbaijan                       | 0.000            | 93           |
| Bahrain                          | 0.000            | 93           |
| Belarus                          | 0.000            | 93           |
| Belgium                          | 0.000            | 93           |
| Benin                            | 0.000            | 93           |
| Bhutan                           | 0.000            | 93           |
| Bolivia                          | 0.000            | 93           |
| Bosnia and Herzegovina           | 0.000            | 93           |
| Botswana                         | 0.000            | 93           |
| Brazil                           | 0.000            | 93           |
| Brunei                           | 0.000            | 93           |
| Bulgaria                         | 0.000            | 93           |
| Burkina Faso                     | 0.000            | 93           |
| Burundi                          | 0.000            | 93           |
| Cameroon                         | 0.000            | 93           |
| Central African Republic         | 0.000            | 93           |
| Chad                             | 0.000            | 93           |
| Chile                            | 0.000            | 93           |
| Congo, Republic of the           | 0.000            | 93           |
| Côte d'Ivoire                    | 0.000            | 93           |
| Croatia                          | 0.000            | 93           |
| Cyprus                           | 0.000            | 93           |
| Czech Republic                   | 0.000            | 93           |
| Democratic Republic of the Congo | 0.000            | 93           |
| Denmark                          | 0.000            | 93           |
| Djibouti                         | 0.000            | 93           |
| Ecuador                          | 0.000            | 93           |
| Egypt                            | 0.000            | 93           |
| Equatorial Guinea                | 0.000            | 93           |
| Eritrea                          | 0.000            | 93           |
| Estonia                          | 0.000            | 93           |
| Ethiopia                         | 0.000            | 93           |
| Faeroe Islands                   | 0.000            | 93           |
| Falkland Islands                 | 0.000            | 93           |
| Finland <sup>8</sup>             | 0.000            | 93           |
| French Guiana                    | 0.000            | 93           |
| Gabon                            | 0.000            | 93           |
| Gambia                           | 0.000            | 93           |
| Georgia                          | 0.000            | 93           |
| Germany                          | 0.000            | 93           |

Table S4. Cont.

| Country              | Cyclone Exposure | Cyclone Rank |
|----------------------|------------------|--------------|
| Ghana                | 0.000            | 93           |
| Gibraltar            | 0.000            | 93           |
| Greece               | 0.000            | 93           |
| Greenland            | 0.000            | 93           |
| Guinea               | 0.000            | 93           |
| Guinea-Bissau        | 0.000            | 93           |
| Guyana               | 0.000            | 93           |
| Hungary              | 0.000            | 93           |
| Iceland              | 0.000            | 93           |
| Iran                 | 0.000            | 93           |
| Iraq                 | 0.000            | 93           |
| Isle of Man          | 0.000            | 93           |
| Israel               | 0.000            | 93           |
| Italy                | 0.000            | 93           |
| Jordan               | 0.000            | 93           |
| Kazakhstan           | 0.000            | 93           |
| Kenya                | 0.000            | 93           |
| Kiribati             | 0.000            | 93           |
| Kuwait               | 0.000            | 93           |
| Kyrgyzstan           | 0.000            | 93           |
| Latvia               | 0.000            | 93           |
| Lebanon              | 0.000            | 93           |
| Lesotho              | 0.000            | 93           |
| Liberia              | 0.000            | 93           |
| Libya                | 0.000            | 93           |
| Liechtenstein        | 0.000            | 93           |
| Lithuania            | 0.000            | 93           |
| Luxembourg           | 0.000            | 93           |
| Macedonia            | 0.000            | 93           |
| Malaysia             | 0.000            | 93           |
| Maldives             | 0.000            | 93           |
| Mali                 | 0.000            | 93           |
| Malta                | 0.000            | 93           |
| Marshall Islands     | 0.000            | 93           |
| Mauritania           | 0.000            | 93           |
| Moldova, Republic of | 0.000            | 93           |
| Monaco               | 0.000            | 93           |
| Mongolia             | 0.000            | 93           |
| Montenegro           | 0.000            | 93           |
| Morocco <sup>9</sup> | 0.000            | 93           |
| Namibia              | 0.000            | 93           |
| Nauru                | 0.000            | 93           |
| Nepal                | 0.000            | 93           |
| Netherlands          | 0.000            | 93           |

Table S4. Cont.

| Country                          | Cyclone Exposure | Cyclone Rank |
|----------------------------------|------------------|--------------|
| Niger                            | 0.000            | 93           |
| Nigeria                          | 0.000            | 93           |
| Norway                           | 0.000            | 93           |
| Oman                             | 0.000            | 93           |
| Palestine                        | 0.000            | 93           |
| Paraguay                         | 0.000            | 93           |
| Peru                             | 0.000            | 93           |
| Pitcairn Islands                 | 0.000            | 93           |
| Poland                           | 0.000            | 93           |
| Qatar                            | 0.000            | 93           |
| Romania                          | 0.000            | 93           |
| Rwanda                           | 0.000            | 93           |
| Saint Helena                     | 0.000            | 93           |
| San Marino                       | 0.000            | 93           |
| Sao Tome and Principe            | 0.000            | 93           |
| Saudi Arabia                     | 0.000            | 93           |
| Senegal                          | 0.000            | 93           |
| Serbia                           | 0.000            | 93           |
| Seychelles                       | 0.000            | 93           |
| Sierra Leone                     | 0.000            | 93           |
| Singapore                        | 0.000            | 93           |
| Slovakia                         | 0.000            | 93           |
| Slovenia                         | 0.000            | 93           |
| Somalia                          | 0.000            | 93           |
| Sudan <sup>10</sup>              | 0.000            | 93           |
| Suriname                         | 0.000            | 93           |
| Sweden                           | 0.000            | 93           |
| Switzerland                      | 0.000            | 93           |
| Syria                            | 0.000            | 93           |
| Tajikistan                       | 0.000            | 93           |
| Tanzania, United Republic of     | 0.000            | 93           |
| Togo                             | 0.000            | 93           |
| Tokelau                          | 0.000            | 93           |
| Tunisia                          | 0.000            | 93           |
| Turkey                           | 0.000            | 93           |
| Turkmenistan                     | 0.000            | 93           |
| Uganda                           | 0.000            | 93           |
| Ukraine                          | 0.000            | 93           |
| United Arab Emirates             | 0.000            | 93           |
| Uruguay                          | 0.000            | 93           |
| Uzbekistan                       | 0.000            | 93           |
| Vatican City State <sup>11</sup> | 0.000            | 93           |
| Yemen                            | 0.000            | 93           |
| Zambia                           | 0.000            | 93           |

**Table S4. Cont.**

Notes: <sup>1</sup> Special Administrative Region (SAR) of China; <sup>2</sup> includes Saint Barthelemy and Saint Martin; <sup>3</sup> Republic of Korea; <sup>4</sup> Democratic People's Republic of Korea; <sup>5</sup> includes Mayotte; <sup>6</sup> includes Guernsey and Jersey; <sup>7</sup> includes Christmas Island and Cocos islands; <sup>8</sup> includes Aland Islands; <sup>9</sup> includes Western Sahara; <sup>10</sup> includes Southern Sudan; <sup>11</sup> Holy See.

**Table S5. Drought exposure and rank.**

| Country               | Drought Exposure | Drought Rank |
|-----------------------|------------------|--------------|
| Gibraltar             | 1.000            | 1            |
| Lebanon               | 0.900            | 2            |
| Malta                 | 0.900            | 2            |
| Nauru                 | 0.900            | 2            |
| Swaziland             | 0.900            | 2            |
| Saint Kitts and Nevis | 0.900            | 6            |
| Djibouti              | 0.877            | 7            |
| Jordan                | 0.865            | 8            |
| Myanmar               | 0.848            | 9            |
| Guatemala             | 0.842            | 10           |
| Syria                 | 0.838            | 11           |
| Zimbabwe              | 0.813            | 12           |
| Eritrea               | 0.799            | 13           |
| Pakistan              | 0.777            | 14           |
| Somalia               | 0.775            | 15           |
| Lesotho               | 0.773            | 16           |
| Iraq                  | 0.720            | 17           |
| Chile                 | 0.717            | 18           |
| Kiribati              | 0.708            | 19           |
| Malawi                | 0.702            | 20           |
| Bhutan                | 0.698            | 21           |
| Morocco <sup>1</sup>  | 0.683            | 22           |
| Angola                | 0.667            | 23           |
| Iran                  | 0.663            | 24           |
| India                 | 0.653            | 25           |
| United Arab Emirates  | 0.652            | 26           |
| Ecuador               | 0.651            | 27           |
| Tajikistan            | 0.628            | 28           |
| Bangladesh            | 0.626            | 29           |
| Zambia                | 0.617            | 30           |
| Mozambique            | 0.615            | 31           |
| Afghanistan           | 0.611            | 32           |
| Namibia               | 0.592            | 33           |
| Sierra Leone          | 0.589            | 34           |
| Thailand              | 0.559            | 35           |
| Ethiopia              | 0.555            | 36           |
| Palestine             | 0.540            | 37           |
| Greece                | 0.533            | 38           |

Table S5. Cont.

| Country                         | Drought Exposure | Drought Rank |
|---------------------------------|------------------|--------------|
| Laos                            | 0.529            | 39           |
| Mexico                          | 0.528            | 40           |
| Timor-Leste                     | 0.520            | 41           |
| South Africa                    | 0.517            | 42           |
| Botswana                        | 0.517            | 43           |
| Nepal                           | 0.515            | 44           |
| Anguilla                        | 0.500            | 45           |
| Barbados                        | 0.500            | 45           |
| British Virgin Islands          | 0.500            | 45           |
| United States Virgin Islands    | 0.498            | 48           |
| Nicaragua                       | 0.495            | 49           |
| Azerbaijan                      | 0.486            | 50           |
| Cyprus                          | 0.485            | 51           |
| Sudan <sup>2</sup>              | 0.464            | 52           |
| Kyrgyzstan                      | 0.452            | 53           |
| Nigeria                         | 0.451            | 54           |
| Colombia                        | 0.442            | 55           |
| Uzbekistan                      | 0.438            | 56           |
| Libya                           | 0.435            | 57           |
| Kazakhstan                      | 0.431            | 58           |
| Netherlands Antilles            | 0.425            | 59           |
| Indonesia                       | 0.425            | 60           |
| Chad                            | 0.423            | 61           |
| Senegal                         | 0.423            | 62           |
| Gambia                          | 0.422            | 63           |
| Spain                           | 0.422            | 64           |
| Guadeloupe <sup>3</sup>         | 0.408            | 65           |
| New Caledonia                   | 0.408            | 66           |
| Micronesia, Federated States of | 0.400            | 67           |
| Guam                            | 0.400            | 68           |
| Montserrat                      | 0.400            | 68           |
| Antigua and Barbuda             | 0.400            | 70           |
| Dominica                        | 0.400            | 70           |
| Palau                           | 0.397            | 72           |
| Venezuela                       | 0.396            | 73           |
| Philippines                     | 0.393            | 74           |
| Niger                           | 0.392            | 75           |
| Cape Verde                      | 0.390            | 76           |
| Turkey                          | 0.388            | 77           |
| Tanzania, United Republic of    | 0.385            | 78           |
| Portugal                        | 0.381            | 79           |
| Vietnam                         | 0.379            | 80           |
| Mali                            | 0.377            | 81           |
| Tuvalu                          | 0.375            | 82           |

Table S5. Cont.

| Country                          | Drought Exposure | Drought Rank |
|----------------------------------|------------------|--------------|
| Algeria                          | 0.368            | 83           |
| Cambodia                         | 0.367            | 84           |
| Guinea                           | 0.359            | 85           |
| Israel                           | 0.346            | 86           |
| China                            | 0.343            | 87           |
| Tonga                            | 0.338            | 88           |
| Burkina Faso                     | 0.334            | 89           |
| Benin                            | 0.315            | 90           |
| Kenya                            | 0.303            | 91           |
| Argentina                        | 0.300            | 92           |
| Tunisia                          | 0.290            | 93           |
| Vanuatu                          | 0.277            | 94           |
| Australia <sup>4</sup>           | 0.273            | 95           |
| Guinea-Bissau                    | 0.267            | 96           |
| Cuba                             | 0.264            | 97           |
| Brazil                           | 0.259            | 98           |
| Mongolia                         | 0.249            | 99           |
| Fiji                             | 0.249            | 100          |
| Bolivia                          | 0.238            | 101          |
| Madagascar                       | 0.238            | 102          |
| Togo                             | 0.236            | 103          |
| Northern Mariana Islands         | 0.229            | 104          |
| North Korea <sup>5</sup>         | 0.221            | 105          |
| Burundi                          | 0.219            | 106          |
| Costa Rica                       | 0.218            | 107          |
| United States of America         | 0.209            | 108          |
| Niue                             | 0.200            | 109          |
| Wallis and Futuna Islands        | 0.200            | 110          |
| Guyana                           | 0.193            | 111          |
| Cook Islands                     | 0.179            | 112          |
| Congo, Republic of the           | 0.177            | 113          |
| Peru                             | 0.175            | 114          |
| Mauritania                       | 0.172            | 115          |
| Central African Republic         | 0.171            | 116          |
| Papua New Guinea                 | 0.171            | 117          |
| South Korea <sup>6</sup>         | 0.163            | 118          |
| Cameroon                         | 0.144            | 119          |
| Turkmenistan                     | 0.141            | 120          |
| Democratic Republic of the Congo | 0.138            | 121          |
| Moldova, Republic of             | 0.137            | 122          |
| Liberia                          | 0.130            | 123          |
| Canada                           | 0.124            | 124          |
| Côte d'Ivoire                    | 0.118            | 125          |
| Comoros <sup>7</sup>             | 0.116            | 126          |

Table S5. Cont.

| Country                         | Drought Exposure | Drought Rank |
|---------------------------------|------------------|--------------|
| Ghana                           | 0.113            | 127          |
| Sweden                          | 0.113            | 128          |
| Uruguay                         | 0.108            | 129          |
| Russia                          | 0.107            | 130          |
| Brunei                          | 0.103            | 131          |
| Macao <sup>8</sup>              | 0.100            | 132          |
| Monaco                          | 0.100            | 132          |
| Vatican City State <sup>9</sup> | 0.100            | 132          |
| Sri Lanka                       | 0.100            | 135          |
| American Samoa                  | 0.098            | 136          |
| Armenia                         | 0.095            | 137          |
| Paraguay                        | 0.095            | 138          |
| Hong Kong <sup>8</sup>          | 0.095            | 139          |
| Samoa                           | 0.093            | 140          |
| Andorra                         | 0.093            | 141          |
| Aruba                           | 0.091            | 142          |
| Gabon                           | 0.089            | 143          |
| Italy                           | 0.087            | 144          |
| Denmark                         | 0.085            | 145          |
| Channel Islands <sup>10</sup>   | 0.081            | 146          |
| Equatorial Guinea               | 0.068            | 147          |
| Honduras                        | 0.067            | 148          |
| Norway                          | 0.059            | 149          |
| Netherlands                     | 0.058            | 150          |
| Haiti                           | 0.057            | 151          |
| Solomon Islands                 | 0.055            | 152          |
| Bulgaria                        | 0.054            | 153          |
| Dominican Republic              | 0.052            | 154          |
| Germany                         | 0.051            | 155          |
| Panama                          | 0.050            | 156          |
| Uganda                          | 0.050            | 157          |
| Greenland                       | 0.044            | 158          |
| Romania                         | 0.044            | 159          |
| France                          | 0.039            | 160          |
| Malaysia                        | 0.034            | 161          |
| Poland                          | 0.034            | 162          |
| French Polynesia                | 0.032            | 163          |
| United Kingdom                  | 0.031            | 164          |
| Ukraine                         | 0.029            | 165          |
| Jamaica                         | 0.027            | 166          |
| Saudi Arabia                    | 0.027            | 167          |
| Hungary                         | 0.026            | 168          |
| Mauritius                       | 0.024            | 169          |
| Bosnia and Herzegovina          | 0.024            | 170          |

Table S5. Cont.

| Country               | Drought Exposure | Drought Rank |
|-----------------------|------------------|--------------|
| Georgia               | 0.022            | 171          |
| Belgium               | 0.021            | 172          |
| Macedonia             | 0.019            | 173          |
| Croatia               | 0.018            | 174          |
| New Zealand           | 0.017            | 175          |
| Serbia                | 0.015            | 176          |
| Oman                  | 0.015            | 177          |
| Albania               | 0.013            | 178          |
| Finland <sup>11</sup> | 0.013            | 179          |
| Rwanda                | 0.012            | 180          |
| Bahamas               | 0.010            | 181          |
| Japan                 | 0.009            | 182          |
| El Salvador           | 0.008            | 183          |
| Cayman Islands        | 0.005            | 184          |
| Ireland               | 0.004            | 185          |
| Luxembourg            | 0.003            | 186          |
| Estonia               | 0.001            | 187          |
| Kuwait                | 0.001            | 188          |
| Yemen                 | 0.000            | 189          |
| Suriname              | 0.000            | 190          |
| Latvia                | 0.000            | 191          |
| Falkland Islands      | 0.000            | 192          |
| Austria               | 0.000            | 193          |
| Bahrain               | 0.000            | 193          |
| Belarus               | 0.000            | 193          |
| Belize                | 0.000            | 193          |
| Bermuda               | 0.000            | 193          |
| Czech Republic        | 0.000            | 193          |
| Egypt                 | 0.000            | 193          |
| Faeroe Islands        | 0.000            | 193          |
| French Guiana         | 0.000            | 193          |
| Grenada               | 0.000            | 193          |
| Iceland               | 0.000            | 193          |
| Isle of Man           | 0.000            | 193          |
| Liechtenstein         | 0.000            | 193          |
| Lithuania             | 0.000            | 193          |
| Maldives              | 0.000            | 193          |
| Marshall Islands      | 0.000            | 193          |
| Martinique            | 0.000            | 193          |
| Montenegro            | 0.000            | 193          |
| Pitcairn Islands      | 0.000            | 193          |
| Puerto Rico           | 0.000            | 193          |
| Qatar                 | 0.000            | 193          |
| Réunion               | 0.000            | 193          |



**Table S5. Cont.**

| <b>Country</b>                   | <b>Drought Exposure</b> | <b>Drought Rank</b> |
|----------------------------------|-------------------------|---------------------|
| Saint Helena                     | 0.000                   | 193                 |
| Saint Lucia                      | 0.000                   | 193                 |
| Saint Pierre and Miquelon        | 0.000                   | 193                 |
| Saint Vincent and the Grenadines | 0.000                   | 193                 |
| San Marino                       | 0.000                   | 193                 |
| Sao Tome and Principe            | 0.000                   | 193                 |
| Seychelles                       | 0.000                   | 193                 |
| Singapore                        | 0.000                   | 193                 |
| Slovakia                         | 0.000                   | 193                 |
| Slovenia                         | 0.000                   | 193                 |
| Switzerland                      | 0.000                   | 193                 |
| Tokelau                          | 0.000                   | 193                 |
| Trinidad and Tobago              | 0.000                   | 193                 |
| Turks and Caicos Islands         | 0.000                   | 193                 |

Notes: <sup>1</sup> includes Western Sahara; <sup>2</sup> includes Southern Sudan; <sup>3</sup> includes Saint Barthelemy and Saint Martin; <sup>4</sup> includes Christmas Island and Cocos islands; <sup>5</sup> Democratic People's Republic of Korea; <sup>6</sup> Republic of Korea; <sup>7</sup> includes Mayotte; <sup>8</sup> Special Administrative Region (SAR) of China; <sup>9</sup> Holy See; <sup>10</sup> includes Guernsey and Jersey; <sup>11</sup> includes Aland Islands.

**Table S6. Flood exposure and rank.**

| <b>Country</b>           | <b>Flood Exposure</b> | <b>Flood Rank</b> |
|--------------------------|-----------------------|-------------------|
| Macao <sup>1</sup>       | 1.000                 | 1                 |
| Bangladesh               | 0.999                 | 2                 |
| Hong Kong <sup>1</sup>   | 0.997                 | 3                 |
| Jamaica                  | 0.966                 | 4                 |
| Guatemala                | 0.954                 | 5                 |
| Nepal                    | 0.954                 | 6                 |
| Liechtenstein            | 0.900                 | 7                 |
| Singapore                | 0.900                 | 7                 |
| El Salvador              | 0.899                 | 9                 |
| Honduras                 | 0.895                 | 10                |
| Sri Lanka                | 0.880                 | 11                |
| Vietnam                  | 0.878                 | 12                |
| Haiti                    | 0.874                 | 13                |
| Cambodia                 | 0.872                 | 14                |
| South Korea <sup>2</sup> | 0.864                 | 15                |
| Colombia                 | 0.852                 | 16                |
| Ecuador                  | 0.836                 | 17                |
| Kenya                    | 0.823                 | 18                |
| Rwanda                   | 0.818                 | 19                |
| Thailand                 | 0.815                 | 20                |
| Paraguay                 | 0.807                 | 21                |
| Philippines              | 0.805                 | 22                |

Table S6. Cont.

| Country                  | Flood Exposure | Flood Rank |
|--------------------------|----------------|------------|
| United Kingdom           | 0.797          | 23         |
| Dominican Republic       | 0.793          | 24         |
| Luxembourg               | 0.768          | 25         |
| Switzerland              | 0.751          | 26         |
| Indonesia                | 0.701          | 27         |
| Niger                    | 0.692          | 28         |
| Nicaragua                | 0.682          | 29         |
| Uganda                   | 0.680          | 30         |
| Tajikistan               | 0.680          | 31         |
| Malaysia                 | 0.672          | 32         |
| Romania                  | 0.660          | 33         |
| Trinidad and Tobago      | 0.653          | 34         |
| Peru                     | 0.650          | 35         |
| Argentina                | 0.641          | 36         |
| Chile                    | 0.636          | 37         |
| Venezuela                | 0.627          | 38         |
| Bolivia                  | 0.620          | 39         |
| Yemen                    | 0.612          | 40         |
| India                    | 0.608          | 41         |
| Lebanon                  | 0.600          | 42         |
| Germany                  | 0.596          | 43         |
| Costa Rica               | 0.567          | 44         |
| Afghanistan              | 0.567          | 45         |
| Brazil                   | 0.564          | 46         |
| Burundi                  | 0.564          | 47         |
| Puerto Rico              | 0.557          | 48         |
| China                    | 0.552          | 49         |
| Iran                     | 0.543          | 50         |
| Pakistan                 | 0.541          | 51         |
| Mexico                   | 0.540          | 52         |
| Belgium                  | 0.536          | 53         |
| France                   | 0.532          | 54         |
| Laos                     | 0.531          | 55         |
| Bhutan                   | 0.529          | 56         |
| Czech Republic           | 0.528          | 57         |
| Serbia                   | 0.525          | 58         |
| United States of America | 0.519          | 59         |
| Cuba                     | 0.511          | 60         |
| Uruguay                  | 0.506          | 61         |
| Somalia                  | 0.497          | 62         |
| Slovakia                 | 0.493          | 63         |
| Japan                    | 0.446          | 64         |
| New Zealand              | 0.446          | 65         |
| Macedonia                | 0.440          | 66         |

Table S6. Cont.

| Country                          | Flood Exposure | Flood Rank |
|----------------------------------|----------------|------------|
| Benin                            | 0.439          | 67         |
| Malawi                           | 0.438          | 68         |
| Tanzania, United Republic of     | 0.435          | 69         |
| Israel                           | 0.431          | 70         |
| Algeria                          | 0.426          | 71         |
| Panama                           | 0.422          | 72         |
| Mozambique                       | 0.418          | 73         |
| Australia <sup>3</sup>           | 0.412          | 74         |
| Austria                          | 0.410          | 75         |
| Belize                           | 0.406          | 76         |
| Monaco                           | 0.400          | 77         |
| South Africa                     | 0.400          | 78         |
| North Korea <sup>4</sup>         | 0.382          | 79         |
| Palestine                        | 0.379          | 80         |
| Portugal                         | 0.357          | 81         |
| Georgia                          | 0.356          | 82         |
| Guadeloupe <sup>5</sup>          | 0.355          | 83         |
| Italy                            | 0.341          | 84         |
| Hungary                          | 0.324          | 85         |
| Nigeria                          | 0.324          | 86         |
| Swaziland                        | 0.323          | 87         |
| Poland                           | 0.314          | 88         |
| Fiji                             | 0.311          | 89         |
| Central African Republic         | 0.310          | 90         |
| Sudan <sup>6</sup>               | 0.308          | 91         |
| Tunisia                          | 0.306          | 92         |
| Uzbekistan                       | 0.303          | 93         |
| Burkina Faso                     | 0.293          | 94         |
| Jordan                           | 0.290          | 95         |
| Madagascar                       | 0.281          | 96         |
| Netherlands                      | 0.275          | 97         |
| Bosnia and Herzegovina           | 0.269          | 98         |
| Lesotho                          | 0.263          | 99         |
| Ghana                            | 0.258          | 100        |
| Turkey                           | 0.255          | 101        |
| Syria                            | 0.243          | 102        |
| Togo                             | 0.241          | 103        |
| Montenegro                       | 0.240          | 104        |
| Chad                             | 0.235          | 105        |
| Greece                           | 0.231          | 106        |
| Ethiopia                         | 0.230          | 107        |
| Democratic Republic of the Congo | 0.212          | 108        |
| Spain                            | 0.201          | 109        |
| Congo, Republic of the           | 0.198          | 110        |

Table S6. Cont.

| Country                         | Flood Exposure | Flood Rank |
|---------------------------------|----------------|------------|
| Cameroon                        | 0.193          | 111        |
| Timor-Leste                     | 0.188          | 112        |
| Ireland                         | 0.183          | 113        |
| Albania                         | 0.175          | 114        |
| Belarus                         | 0.173          | 115        |
| Zimbabwe                        | 0.170          | 116        |
| Moldova, Republic of            | 0.163          | 117        |
| Morocco <sup>7</sup>            | 0.151          | 118        |
| Ukraine                         | 0.150          | 119        |
| Turkmenistan                    | 0.128          | 120        |
| Saudi Arabia                    | 0.120          | 121        |
| Mali                            | 0.116          | 122        |
| Croatia                         | 0.112          | 123        |
| Vanuatu                         | 0.110          | 124        |
| Angola                          | 0.108          | 125        |
| Russia                          | 0.105          | 126        |
| Andorra                         | 0.100          | 127        |
| Bermuda                         | 0.100          | 127        |
| San Marino                      | 0.100          | 127        |
| Vatican City State <sup>8</sup> | 0.100          | 127        |
| Aruba                           | 0.100          | 131        |
| Guam                            | 0.100          | 132        |
| Barbados                        | 0.099          | 133        |
| Antigua and Barbuda             | 0.099          | 134        |
| Dominica                        | 0.096          | 135        |
| Myanmar                         | 0.088          | 136        |
| Kyrgyzstan                      | 0.087          | 137        |
| Botswana                        | 0.081          | 138        |
| Canada                          | 0.079          | 139        |
| Azerbaijan                      | 0.078          | 140        |
| Senegal                         | 0.077          | 141        |
| Samoa                           | 0.067          | 142        |
| Slovenia                        | 0.067          | 143        |
| Bulgaria                        | 0.065          | 144        |
| Solomon Islands                 | 0.058          | 145        |
| Iraq                            | 0.052          | 146        |
| Saint Lucia                     | 0.050          | 147        |
| Sierra Leone                    | 0.049          | 148        |
| Eritrea                         | 0.039          | 149        |
| Djibouti                        | 0.038          | 150        |
| Anguilla                        | 0.037          | 151        |
| Comoros <sup>9</sup>            | 0.037          | 152        |
| Egypt                           | 0.037          | 153        |

Table S6. Cont.

| Country                       | Flood Exposure | Flood Rank |
|-------------------------------|----------------|------------|
| Kazakhstan                    | 0.036          | 154        |
| Côte d'Ivoire                 | 0.034          | 155        |
| Armenia                       | 0.034          | 156        |
| Gabon                         | 0.033          | 157        |
| Mauritania                    | 0.023          | 158        |
| Papua New Guinea              | 0.022          | 159        |
| Martinique                    | 0.019          | 160        |
| Zambia                        | 0.019          | 161        |
| Guyana                        | 0.017          | 162        |
| Guinea                        | 0.015          | 163        |
| Oman                          | 0.012          | 164        |
| Lithuania                     | 0.011          | 165        |
| New Caledonia                 | 0.006          | 166        |
| Norway                        | 0.004          | 167        |
| Netherlands Antilles          | 0.003          | 168        |
| Mongolia                      | 0.003          | 169        |
| Liberia                       | 0.002          | 170        |
| United States Virgin Islands  | 0.002          | 171        |
| Brunei                        | 0.001          | 172        |
| Sweden                        | 0.001          | 173        |
| United Arab Emirates          | 0.001          | 174        |
| Kuwait                        | 0.000          | 175        |
| Qatar                         | 0.000          | 176        |
| Suriname                      | 0.000          | 177        |
| Bahrain                       | 0.000          | 178        |
| Namibia                       | 0.000          | 179        |
| Libya                         | 0.000          | 180        |
| American Samoa                | 0.000          | 181        |
| Bahamas                       | 0.000          | 181        |
| British Virgin Islands        | 0.000          | 181        |
| Cape Verde                    | 0.000          | 181        |
| Cayman Islands                | 0.000          | 181        |
| Channel Islands <sup>10</sup> | 0.000          | 181        |
| Cook Islands                  | 0.000          | 181        |
| Cyprus                        | 0.000          | 181        |
| Denmark                       | 0.000          | 181        |
| Equatorial Guinea             | 0.000          | 181        |
| Estonia                       | 0.000          | 181        |
| Faeroe Islands                | 0.000          | 181        |
| Falkland Islands              | 0.000          | 181        |
| Finland <sup>11</sup>         | 0.000          | 181        |
| French Guiana                 | 0.000          | 181        |
| French Polynesia              | 0.000          | 181        |
| Gambia                        | 0.000          | 181        |

Table S6. Cont.

| Country                          | Flood Exposure | Flood Rank |
|----------------------------------|----------------|------------|
| Gibraltar                        | 0.000          | 181        |
| Greenland                        | 0.000          | 181        |
| Grenada                          | 0.000          | 181        |
| Guinea-Bissau                    | 0.000          | 181        |
| Iceland                          | 0.000          | 181        |
| Isle of Man                      | 0.000          | 181        |
| Kiribati                         | 0.000          | 181        |
| Latvia                           | 0.000          | 181        |
| Maldives                         | 0.000          | 181        |
| Malta                            | 0.000          | 181        |
| Marshall Islands                 | 0.000          | 181        |
| Mauritius                        | 0.000          | 181        |
| Micronesia, Federated States of  | 0.000          | 181        |
| Montserrat                       | 0.000          | 181        |
| Nauru                            | 0.000          | 181        |
| Niue                             | 0.000          | 181        |
| Northern Mariana Islands         | 0.000          | 181        |
| Palau                            | 0.000          | 181        |
| Pitcairn Islands                 | 0.000          | 181        |
| Réunion                          | 0.000          | 181        |
| Saint Helena                     | 0.000          | 181        |
| Saint Kitts and Nevis            | 0.000          | 181        |
| Saint Pierre and Miquelon        | 0.000          | 181        |
| Saint Vincent and the Grenadines | 0.000          | 181        |
| Sao Tome and Principe            | 0.000          | 181        |
| Seychelles                       | 0.000          | 181        |
| Tokelau                          | 0.000          | 181        |
| Tonga                            | 0.000          | 181        |
| Turks and Caicos Islands         | 0.000          | 181        |
| Tuvalu                           | 0.000          | 181        |
| Wallis and Futuna Islands        | 0.000          | 181        |

Notes: <sup>1</sup> Special Administrative Region (SAR) of China; <sup>2</sup> Republic of Korea; <sup>3</sup> includes Christmas Island and Cocos islands; <sup>4</sup> Democratic People's Republic of Korea; <sup>5</sup> includes Saint Barthelemy and Saint Martin; <sup>6</sup> includes Southern Sudan; <sup>7</sup> includes Western Sahara; <sup>8</sup> Holy See; <sup>9</sup> includes Mayotte; <sup>10</sup> includes Guernsey and Jersey; <sup>11</sup> includes Aland Islands.

**Table S7.** Urban population exposure by country.

| Country                | % Rural | % Urban | Urban Per Capita Cyclone Exposure | Urban Per Capita Drought Exposure | Urban Per Capita Flood Exposure | Urban Per Capita Multi-Hazard Exposure |
|------------------------|---------|---------|-----------------------------------|-----------------------------------|---------------------------------|----------------------------------------|
| Afghanistan            | 76.5    | 23.5    | 0.000                             | 0.746                             | 0.725                           | 1.472                                  |
| Albania                | 46.6    | 53.4    | 0.000                             | 0.001                             | 0.159                           | 0.160                                  |
| Algeria                | 27.0    | 73.0    | 0.000                             | 0.382                             | 0.434                           | 0.816                                  |
| American Samoa         | 6.8     | 93.2    | 0.080                             | 0.098                             | 0.000                           | 0.178                                  |
| Andorra                | 12.7    | 87.3    | 0.000                             | 0.094                             | 0.100                           | 0.194                                  |
| Angola                 | 40.8    | 59.2    | 0.000                             | 0.706                             | 0.147                           | 0.853                                  |
| Anguilla               | N/A     | 100.0   | 0.839                             | 0.500                             | 0.037                           | 1.376                                  |
| Antigua and Barbuda    | 70.2    | 29.8    | 0.893                             | 0.397                             | 0.099                           | 1.389                                  |
| Argentina              | 7.5     | 92.5    | 0.000                             | 0.302                             | 0.657                           | 0.959                                  |
| Armenia                | 35.9    | 64.1    | 0.000                             | 0.052                             | 0.018                           | 0.070                                  |
| Aruba                  | 53.2    | 46.9    | 0.017                             | 0.067                             | 0.102                           | 0.186                                  |
| Australia <sup>1</sup> | 10.8    | 89.2    | 0.032                             | 0.279                             | 0.435                           | 0.746                                  |
| Austria                | 32.3    | 67.7    | 0.000                             | 0.000                             | 0.423                           | 0.423                                  |
| Azerbaijan             | 46.4    | 53.6    | 0.000                             | 0.486                             | 0.072                           | 0.558                                  |
| Bahamas                | 15.7    | 84.3    | 0.546                             | 0.003                             | 0.000                           | 0.549                                  |
| Bahrain                | 11.3    | 88.7    | 0.000                             | 0.000                             | 0.000                           | 0.000                                  |
| Bangladesh             | 71.6    | 28.4    | 0.165                             | 0.556                             | 0.999                           | 1.720                                  |
| Barbados               | 55.6    | 44.4    | 0.101                             | 0.505                             | 0.101                           | 0.707                                  |
| Belarus                | 25.0    | 75.0    | 0.000                             | 0.000                             | 0.157                           | 0.157                                  |
| Belgium                | 2.5     | 97.5    | 0.000                             | 0.021                             | 0.534                           | 0.556                                  |
| Belize                 | 55.3    | 44.7    | 0.807                             | 0.000                             | 0.396                           | 1.203                                  |
| Benin                  | 55.1    | 44.9    | 0.000                             | 0.277                             | 0.421                           | 0.698                                  |
| Bermuda                | N/A     | 100.0   | 0.784                             | 0.000                             | 0.100                           | 0.884                                  |
| Bhutan                 | 64.4    | 35.6    | 0.000                             | 0.649                             | 0.525                           | 1.174                                  |
| Bolivia                | 33.2    | 66.8    | 0.000                             | 0.235                             | 0.649                           | 0.884                                  |
| Bosnia and Herzegovina | 51.7    | 48.3    | 0.000                             | 0.020                             | 0.272                           | 0.292                                  |
| Botswana               | 38.4    | 61.7    | 0.000                             | 0.528                             | 0.070                           | 0.598                                  |
| Brazil                 | 15.4    | 84.6    | 0.000                             | 0.237                             | 0.610                           | 0.846                                  |
| British Virgin Islands | 59.4    | 40.6    | 0.934                             | 0.505                             | 0.000                           | 1.439                                  |
| Brunei                 | 24.0    | 76.0    | 0.000                             | 0.103                             | 0.000                           | 0.103                                  |
| Bulgaria               | 26.9    | 73.1    | 0.000                             | 0.056                             | 0.058                           | 0.114                                  |
| Burkina Faso           | 73.5    | 26.5    | 0.000                             | 0.363                             | 0.324                           | 0.687                                  |
| Burundi                | 89.1    | 10.9    | 0.000                             | 0.156                             | 0.498                           | 0.654                                  |
| Cambodia               | 80.0    | 20.0    | 0.001                             | 0.251                             | 0.844                           | 1.097                                  |
| Cameroon               | 47.9    | 52.1    | 0.000                             | 0.143                             | 0.241                           | 0.384                                  |
| Canada                 | 19.4    | 80.7    | 0.095                             | 0.125                             | 0.083                           | 0.303                                  |
| Cape Verde             | 37.4    | 62.6    | 0.006                             | 0.370                             | 0.000                           | 0.376                                  |

Table S7. Cont.

| Country                          | % Rural | % Urban | Urban Per Capita Cyclone Exposure | Urban Per Capita Drought Exposure | Urban Per Capita Flood Exposure | Urban Per Capita Multi-Hazard Exposure |
|----------------------------------|---------|---------|-----------------------------------|-----------------------------------|---------------------------------|----------------------------------------|
| Cayman Islands                   | N/A     | 100.0   | 0.526                             | 0.005                             | 0.000                           | 0.530                                  |
| Central African Republic         | 60.9    | 39.1    | 0.000                             | 0.144                             | 0.442                           | 0.586                                  |
| Chad                             | 78.2    | 21.8    | 0.000                             | 0.378                             | 0.242                           | 0.620                                  |
| Channel Islands <sup>2</sup>     | 68.8    | 31.2    | 0.060                             | 0.119                             | 0.000                           | 0.179                                  |
| Chile                            | 10.8    | 89.2    | 0.000                             | 0.751                             | 0.670                           | 1.421                                  |
| China                            | 49.4    | 50.6    | 0.249                             | 0.322                             | 0.577                           | 1.148                                  |
| Colombia                         | 24.7    | 75.3    | 0.001                             | 0.479                             | 0.855                           | 1.335                                  |
| Comoros <sup>3</sup>             | 67.2    | 32.8    | 0.355                             | 0.098                             | 0.025                           | 0.478                                  |
| Congo, Republic of the           | 36.3    | 63.7    | 0.000                             | 0.166                             | 0.229                           | 0.394                                  |
| Cook Islands                     | 26.5    | 73.5    | 0.214                             | 0.178                             | 0.000                           | 0.392                                  |
| Costa Rica                       | 35.3    | 64.7    | 0.098                             | 0.198                             | 0.506                           | 0.802                                  |
| Côte d'Ivoire                    | 48.7    | 51.3    | 0.000                             | 0.064                             | 0.045                           | 0.109                                  |
| Croatia                          | 42.2    | 57.8    | 0.000                             | 0.017                             | 0.103                           | 0.120                                  |
| Cuba                             | 24.8    | 75.2    | 0.498                             | 0.262                             | 0.467                           | 1.226                                  |
| Cyprus                           | 29.5    | 70.5    | 0.000                             | 0.473                             | 0.000                           | 0.473                                  |
| Czech Republic                   | 26.6    | 73.4    | 0.000                             | 0.000                             | 0.539                           | 0.539                                  |
| Democratic Republic of the Congo | 65.7    | 34.3    | 0.000                             | 0.160                             | 0.275                           | 0.435                                  |
| Denmark                          | 13.1    | 86.9    | 0.000                             | 0.079                             | 0.000                           | 0.079                                  |
| Djibouti                         | 22.9    | 77.1    | 0.000                             | 0.892                             | 0.015                           | 0.907                                  |
| Dominica                         | 32.9    | 67.1    | 0.798                             | 0.399                             | 0.096                           | 1.293                                  |
| Dominican Republic               | 30.3    | 69.7    | 0.536                             | 0.044                             | 0.796                           | 1.376                                  |
| Ecuador                          | 32.5    | 67.5    | 0.000                             | 0.676                             | 0.854                           | 1.530                                  |
| Egypt                            | 56.5    | 43.5    | 0.000                             | 0.000                             | 0.065                           | 0.065                                  |
| El Salvador                      | 35.2    | 64.8    | 0.002                             | 0.003                             | 0.900                           | 0.905                                  |
| Equatorial Guinea                | 60.5    | 39.5    | 0.000                             | 0.116                             | 0.000                           | 0.116                                  |
| Eritrea                          | 78.7    | 21.3    | 0.000                             | 0.831                             | 0.000                           | 0.831                                  |
| Estonia                          | 30.5    | 69.5    | 0.000                             | 0.001                             | 0.000                           | 0.001                                  |
| Ethiopia                         | 83.0    | 17.0    | 0.000                             | 0.611                             | 0.269                           | 0.879                                  |
| Faeroe Islands                   | 58.9    | 41.1    | 0.000                             | 0.000                             | 0.000                           | 0.000                                  |
| Falkland Islands                 | 25.9    | 74.1    | 0.000                             | 0.000                             | 0.000                           | 0.000                                  |
| Fiji                             | 47.8    | 52.2    | 0.786                             | 0.262                             | 0.334                           | 1.382                                  |
| Finland <sup>4</sup>             | 16.3    | 83.7    | 0.000                             | 0.011                             | 0.000                           | 0.011                                  |
| France                           | 14.2    | 85.8    | 0.007                             | 0.038                             | 0.550                           | 0.595                                  |
| French Guiana                    | 23.6    | 76.4    | 0.000                             | 0.000                             | 0.000                           | 0.000                                  |
| French Polynesia                 | 48.6    | 51.4    | 0.649                             | 0.000                             | 0.000                           | 0.649                                  |
| Gabon                            | 13.8    | 86.2    | 0.000                             | 0.091                             | 0.030                           | 0.121                                  |



Table S7. Cont.

| Country                 | % Rural | % Urban | Urban Per Capita Cyclone Exposure | Urban Per Capita Drought Exposure | Urban Per Capita Flood Exposure | Urban Per Capita Multi-Hazard Exposure |
|-------------------------|---------|---------|-----------------------------------|-----------------------------------|---------------------------------|----------------------------------------|
| Gambia                  | 42.7    | 57.3    | 0.000                             | 0.412                             | 0.000                           | 0.412                                  |
| Georgia                 | 47.2    | 52.8    | 0.000                             | 0.010                             | 0.378                           | 0.388                                  |
| Germany                 | 26.1    | 73.9    | 0.000                             | 0.053                             | 0.602                           | 0.655                                  |
| Ghana                   | 48.1    | 51.9    | 0.000                             | 0.058                             | 0.325                           | 0.382                                  |
| Gibraltar               | N/A     | 100.0   | 0.000                             | 1.000                             | 0.000                           | 1.000                                  |
| Greece                  | 38.6    | 61.4    | 0.000                             | 0.561                             | 0.289                           | 0.849                                  |
| Greenland               | 15.3    | 84.7    | 0.000                             | 0.049                             | 0.000                           | 0.049                                  |
| Grenada                 | 60.9    | 39.1    | 0.334                             | 0.000                             | 0.000                           | 0.334                                  |
| Guadeloupe <sup>5</sup> | 1.6     | 98.4    | 0.829                             | 0.408                             | 0.355                           | 1.592                                  |
| Guam                    | 6.8     | 93.2    | 1.000                             | 0.400                             | 0.100                           | 1.500                                  |
| Guatemala               | 50.2    | 49.8    | 0.085                             | 0.880                             | 0.973                           | 1.938                                  |
| Guinea                  | 64.6    | 35.4    | 0.000                             | 0.515                             | 0.009                           | 0.524                                  |
| Guinea-Bissau           | 56.1    | 43.9    | 0.000                             | 0.226                             | 0.000                           | 0.226                                  |
| Guyana                  | 71.6    | 28.4    | 0.000                             | 0.200                             | 0.004                           | 0.205                                  |
| Haiti                   | 46.6    | 53.4    | 0.432                             | 0.067                             | 0.912                           | 1.410                                  |
| Honduras                | 47.8    | 52.2    | 0.113                             | 0.065                             | 0.905                           | 1.083                                  |
| Hong Kong <sup>6</sup>  | N/A     | 100.0   | 0.993                             | 0.095                             | 0.997                           | 2.085                                  |
| Hungary                 | 30.5    | 69.5    | 0.000                             | 0.026                             | 0.300                           | 0.326                                  |
| Iceland                 | 6.3     | 93.7    | 0.000                             | 0.000                             | 0.000                           | 0.000                                  |
| India                   | 68.7    | 31.3    | 0.058                             | 0.652                             | 0.671                           | 1.381                                  |
| Indonesia               | 49.3    | 50.7    | 0.006                             | 0.424                             | 0.761                           | 1.192                                  |
| Iran                    | 30.9    | 69.1    | 0.000                             | 0.659                             | 0.560                           | 1.219                                  |
| Iraq                    | 33.5    | 66.5    | 0.000                             | 0.712                             | 0.051                           | 0.763                                  |
| Ireland                 | 37.8    | 62.2    | 0.079                             | 0.004                             | 0.235                           | 0.318                                  |
| Isle of Man             | 49.5    | 50.5    | 0.000                             | 0.000                             | 0.000                           | 0.000                                  |
| Israel                  | 8.1     | 91.9    | 0.000                             | 0.335                             | 0.424                           | 0.759                                  |
| Italy                   | 31.6    | 68.4    | 0.000                             | 0.083                             | 0.348                           | 0.432                                  |
| Jamaica                 | 48.0    | 52.0    | 0.239                             | 0.016                             | 0.980                           | 1.236                                  |
| Japan                   | 8.7     | 91.3    | 0.977                             | 0.009                             | 0.461                           | 1.446                                  |
| Jordan                  | 17.3    | 82.7    | 0.000                             | 0.875                             | 0.281                           | 1.156                                  |
| Kazakhstan              | 46.4    | 53.6    | 0.000                             | 0.465                             | 0.023                           | 0.488                                  |
| Kenya                   | 76.0    | 24.0    | 0.000                             | 0.253                             | 0.880                           | 1.134                                  |
| Kiribati                | 56.1    | 43.9    | 0.000                             | 0.700                             | 0.000                           | 0.700                                  |
| Kuwait                  | 1.8     | 98.3    | 0.000                             | 0.000                             | 0.000                           | 0.000                                  |
| Kyrgyzstan              | 64.7    | 35.4    | 0.000                             | 0.482                             | 0.085                           | 0.568                                  |
| Laos                    | 65.8    | 34.3    | 0.262                             | 0.487                             | 0.547                           | 1.295                                  |
| Latvia                  | 32.3    | 67.7    | 0.000                             | 0.000                             | 0.000                           | 0.000                                  |
| Lebanon                 | 12.8    | 87.3    | 0.000                             | 0.900                             | 0.607                           | 1.507                                  |
| Lesotho                 | 72.4    | 27.6    | 0.000                             | 0.686                             | 0.168                           | 0.854                                  |
| Liberia                 | 51.8    | 48.2    | 0.000                             | 0.169                             | 0.001                           | 0.170                                  |
| Libya                   | 22.3    | 77.7    | 0.000                             | 0.441                             | 0.000                           | 0.441                                  |

Table S7. Cont.

| Country                            | % Rural | % Urban | Urban Per Capita Cyclone Exposure | Urban Per Capita Drought Exposure | Urban Per Capita Flood Exposure | Urban Per Capita Multi-Hazard Exposure |
|------------------------------------|---------|---------|-----------------------------------|-----------------------------------|---------------------------------|----------------------------------------|
| Liechtenstein                      | 85.6    | 14.4    | 0.000                             | 0.000                             | 0.755                           | 0.755                                  |
| Lithuania                          | 32.9    | 67.1    | 0.000                             | 0.000                             | 0.013                           | 0.013                                  |
| Luxembourg                         | 14.6    | 85.4    | 0.000                             | 0.002                             | 0.768                           | 0.769                                  |
| Macao <sup>6</sup>                 | N/A     | 100.0   | 0.895                             | 0.100                             | 1.000                           | 1.995                                  |
| Macedonia                          | 40.7    | 59.3    | 0.000                             | 0.009                             | 0.445                           | 0.454                                  |
| Madagascar                         | 67.4    | 32.6    | 0.882                             | 0.199                             | 0.372                           | 1.452                                  |
| Malawi                             | 84.3    | 15.7    | 0.116                             | 0.727                             | 0.472                           | 1.315                                  |
| Malaysia                           | 27.2    | 72.8    | 0.000                             | 0.029                             | 0.685                           | 0.714                                  |
| Maldives                           | 58.8    | 41.2    | 0.000                             | 0.000                             | 0.000                           | 0.000                                  |
| Mali                               | 65.1    | 34.9    | 0.000                             | 0.412                             | 0.121                           | 0.532                                  |
| Malta                              | 5.2     | 94.8    | 0.000                             | 0.900                             | 0.000                           | 0.900                                  |
| Marshall Islands                   | 28.2    | 71.8    | 0.000                             | 0.000                             | 0.000                           | 0.000                                  |
| Martinique                         | 11.0    | 89.0    | 0.138                             | 0.000                             | 0.015                           | 0.152                                  |
| Mauritania                         | 58.5    | 41.5    | 0.000                             | 0.185                             | 0.014                           | 0.200                                  |
| Mauritius                          | 58.2    | 41.8    | 1.004                             | 0.000                             | 0.000                           | 1.004                                  |
| Mexico                             | 21.9    | 78.1    | 0.092                             | 0.532                             | 0.552                           | 1.176                                  |
| Micronesia,<br>Federated States of | 77.4    | 22.6    | 0.649                             | 0.395                             | 0.000                           | 1.045                                  |
| Moldova,<br>Republic of            | 52.3    | 47.7    | 0.000                             | 0.154                             | 0.149                           | 0.303                                  |
| Monaco                             | N/A     | 100.0   | 0.000                             | 0.100                             | 0.400                           | 0.500                                  |
| Mongolia                           | 31.5    | 68.5    | 0.000                             | 0.328                             | 0.002                           | 0.330                                  |
| Montenegro                         | 36.7    | 63.3    | 0.000                             | 0.000                             | 0.248                           | 0.248                                  |
| Montserrat                         | 85.8    | 14.2    | 1.274                             | 0.637                             | 0.000                           | 1.911                                  |
| Morocco <sup>7</sup>               | 42.6    | 57.5    | 0.000                             | 0.700                             | 0.168                           | 0.868                                  |
| Mozambique                         | 68.8    | 31.2    | 0.287                             | 0.588                             | 0.537                           | 1.412                                  |
| Myanmar                            | 67.4    | 32.6    | 0.031                             | 0.851                             | 0.081                           | 0.963                                  |
| Namibia                            | 61.6    | 38.4    | 0.000                             | 0.646                             | 0.000                           | 0.646                                  |
| Nauru                              | N/A     | 100.0   | 0.000                             | 0.900                             | 0.000                           | 0.900                                  |
| Nepal                              | 83.0    | 17.0    | 0.000                             | 0.575                             | 0.983                           | 1.558                                  |
| Netherlands                        | 16.8    | 83.2    | 0.000                             | 0.056                             | 0.271                           | 0.327                                  |
| Netherlands<br>Antilles            | 6.6     | 93.4    | 0.224                             | 0.426                             | 0.001                           | 0.651                                  |
| New Caledonia                      | 38.3    | 61.7    | 0.987                             | 0.400                             | 0.004                           | 1.392                                  |
| New Zealand                        | 13.8    | 86.2    | 0.022                             | 0.017                             | 0.474                           | 0.513                                  |
| Nicaragua                          | 42.5    | 57.5    | 0.126                             | 0.634                             | 0.688                           | 1.449                                  |
| Niger                              | 82.2    | 17.8    | 0.000                             | 0.411                             | 0.707                           | 1.118                                  |
| Nigeria                            | 50.4    | 49.6    | 0.000                             | 0.465                             | 0.343                           | 0.807                                  |
| Niue                               | 62.1    | 37.9    | 0.466                             | 0.187                             | 0.000                           | 0.653                                  |

Table S7. Cont.

| Country                          | % Rural | % Urban | Urban Per Capita Cyclone Exposure | Urban Per Capita Drought Exposure | Urban Per Capita Flood Exposure | Urban Per Capita Multi-Hazard Exposure |
|----------------------------------|---------|---------|-----------------------------------|-----------------------------------|---------------------------------|----------------------------------------|
| North Korea <sup>8</sup>         | 39.7    | 60.3    | 0.435                             | 0.218                             | 0.354                           | 1.007                                  |
| Northern Mariana Islands         | 8.5     | 91.5    | 0.998                             | 0.224                             | 0.000                           | 1.222                                  |
| Norway                           | 20.6    | 79.4    | 0.000                             | 0.062                             | 0.004                           | 0.066                                  |
| Oman                             | 26.6    | 73.4    | 0.000                             | 0.011                             | 0.011                           | 0.022                                  |
| Pakistan                         | 26.9    | 73.1    | 0.014                             | 0.787                             | 0.566                           | 1.366                                  |
| Palau                            | 63.8    | 36.2    | 0.098                             | 0.392                             | 0.000                           | 0.490                                  |
| Palestine                        | 25.7    | 74.4    | 0.000                             | 0.466                             | 0.358                           | 0.824                                  |
| Panama                           | 15.8    | 84.3    | 0.002                             | 0.045                             | 0.432                           | 0.478                                  |
| Papua New Guinea                 | 24.7    | 75.3    | 0.004                             | 0.160                             | 0.024                           | 0.188                                  |
| Paraguay                         | 87.5    | 12.5    | 0.000                             | 0.082                             | 0.874                           | 0.956                                  |
| Peru                             | 38.1    | 61.9    | 0.000                             | 0.165                             | 0.655                           | 0.820                                  |
| Philippines                      | 22.7    | 77.3    | 0.888                             | 0.394                             | 0.832                           | 2.114                                  |
| Pitcairn Islands                 | 51.2    | 48.8    | 0.000                             | 0.000                             | 0.000                           | 0.000                                  |
| Poland                           | 39.1    | 60.9    | 0.000                             | 0.035                             | 0.306                           | 0.341                                  |
| Portugal                         | 38.9    | 61.1    | 0.006                             | 0.399                             | 0.336                           | 0.742                                  |
| Puerto Rico                      | 1.1     | 98.9    | 0.843                             | 0.000                             | 0.557                           | 1.400                                  |
| Qatar                            | 1.2     | 98.8    | 0.000                             | 0.000                             | 0.000                           | 0.000                                  |
| Réunion                          | 5.7     | 94.3    | 0.995                             | 0.000                             | 0.000                           | 0.995                                  |
| Romania                          | 47.2    | 52.8    | 0.000                             | 0.047                             | 0.648                           | 0.695                                  |
| Russia                           | 26.2    | 73.8    | 0.012                             | 0.098                             | 0.109                           | 0.219                                  |
| Rwanda                           | 80.9    | 19.1    | 0.000                             | 0.006                             | 0.809                           | 0.815                                  |
| Saint Helena                     | 60.5    | 39.5    | 0.000                             | 0.000                             | 0.000                           | 0.000                                  |
| Saint Kitts and Nevis            | 68.0    | 32.0    | 0.796                             | 0.895                             | 0.000                           | 1.691                                  |
| Saint Lucia                      | 82.5    | 17.5    | 0.091                             | 0.000                             | 0.091                           | 0.181                                  |
| Saint Pierre and Miquelon        | 9.3     | 90.7    | 0.712                             | 0.000                             | 0.000                           | 0.712                                  |
| Saint Vincent and the Grenadines | 50.7    | 49.3    | 0.413                             | 0.000                             | 0.000                           | 0.413                                  |
| Samoa                            | 80.1    | 19.9    | 0.124                             | 0.099                             | 0.099                           | 0.322                                  |
| San Marino                       | 5.9     | 94.1    | 0.000                             | 0.000                             | 0.100                           | 0.100                                  |
| Sao Tome and Principe            | 37.3    | 62.7    | 0.000                             | 0.000                             | 0.000                           | 0.000                                  |
| Saudi Arabia                     | 17.7    | 82.3    | 0.000                             | 0.021                             | 0.134                           | 0.155                                  |
| Senegal                          | 57.5    | 42.5    | 0.000                             | 0.412                             | 0.090                           | 0.502                                  |
| Serbia                           | 43.6    | 56.4    | 0.000                             | 0.010                             | 0.546                           | 0.556                                  |
| Seychelles                       | 46.4    | 53.6    | 0.000                             | 0.000                             | 0.000                           | 0.000                                  |
| Sierra Leone                     | 60.8    | 39.2    | 0.000                             | 0.671                             | 0.034                           | 0.705                                  |
| Singapore                        | N/A     | 100.0   | 0.000                             | 0.000                             | 0.900                           | 0.900                                  |

Table S7. Cont.

| Country                      | % Rural | % Urban | Urban Per Capita Cyclone Exposure | Urban Per Capita Drought Exposure | Urban Per Capita Flood Exposure | Urban Per Capita Multi-Hazard Exposure |
|------------------------------|---------|---------|-----------------------------------|-----------------------------------|---------------------------------|----------------------------------------|
| Slovakia                     | 45.3    | 54.7    | 0.000                             | 0.000                             | 0.484                           | 0.484                                  |
| Slovenia                     | 50.1    | 49.9    | 0.000                             | 0.000                             | 0.055                           | 0.055                                  |
| Solomon Islands              | 79.5    | 20.5    | 0.039                             | 0.059                             | 0.052                           | 0.150                                  |
| Somalia                      | 62.3    | 37.7    | 0.000                             | 0.867                             | 0.632                           | 1.500                                  |
| South Africa                 | 38.0    | 62.0    | 0.000                             | 0.514                             | 0.352                           | 0.867                                  |
| South Korea <sup>9</sup>     | 16.8    | 83.2    | 0.786                             | 0.166                             | 0.874                           | 1.825                                  |
| Spain                        | 22.6    | 77.4    | 0.001                             | 0.404                             | 0.214                           | 0.619                                  |
| Sri Lanka                    | 84.9    | 15.1    | 0.011                             | 0.051                             | 0.803                           | 0.866                                  |
| Sudan <sup>10</sup>          | 70.3    | 29.7    | 0.000                             | 0.326                             | 0.495                           | 0.821                                  |
| Suriname                     | 30.3    | 69.7    | 0.000                             | 0.000                             | 0.000                           | 0.000                                  |
| Swaziland                    | 78.8    | 21.3    | 0.001                             | 0.901                             | 0.196                           | 1.098                                  |
| Sweden                       | 14.8    | 85.2    | 0.000                             | 0.115                             | 0.001                           | 0.116                                  |
| Switzerland                  | 26.3    | 73.7    | 0.000                             | 0.000                             | 0.749                           | 0.749                                  |
| Syria                        | 43.9    | 56.1    | 0.000                             | 0.867                             | 0.261                           | 1.129                                  |
| Tajikistan                   | 73.5    | 26.5    | 0.000                             | 0.680                             | 0.671                           | 1.351                                  |
| Tanzania, United Republic of | 73.3    | 26.7    | 0.000                             | 0.325                             | 0.509                           | 0.834                                  |
| Thailand                     | 65.9    | 34.1    | 0.013                             | 0.483                             | 0.765                           | 1.262                                  |
| Timor-Leste                  | 71.7    | 28.3    | 0.021                             | 0.512                             | 0.135                           | 0.669                                  |
| Togo                         | 62.0    | 38.0    | 0.000                             | 0.154                             | 0.150                           | 0.304                                  |
| Tokelau                      | 100.0   | N/A     | 0.000                             | 0.000                             | 0.000                           | N/A                                    |
| Tonga                        | 76.6    | 23.4    | 0.567                             | 0.409                             | 0.000                           | 0.976                                  |
| Trinidad and Tobago          | 86.3    | 13.7    | 0.000                             | 0.000                             | 0.627                           | 0.627                                  |
| Tunisia                      | 33.7    | 66.3    | 0.000                             | 0.308                             | 0.267                           | 0.575                                  |
| Turkey                       | 28.5    | 71.5    | 0.000                             | 0.369                             | 0.289                           | 0.658                                  |
| Turkmenistan                 | 51.3    | 48.7    | 0.000                             | 0.112                             | 0.156                           | 0.268                                  |
| Turks and Caicos Islands     | 6.2     | 93.8    | 0.728                             | 0.000                             | 0.000                           | 0.728                                  |
| Tuvalu                       | 49.4    | 50.6    | 0.096                             | 0.096                             | 0.000                           | 0.193                                  |
| Uganda                       | 84.4    | 15.6    | 0.000                             | 0.013                             | 0.754                           | 0.767                                  |
| Ukraine                      | 31.1    | 68.9    | 0.000                             | 0.030                             | 0.134                           | 0.164                                  |
| United Arab Emirates         | 15.6    | 84.4    | 0.000                             | 0.689                             | 0.000                           | 0.689                                  |
| United Kingdom               | 20.4    | 79.6    | 0.062                             | 0.033                             | 0.817                           | 0.912                                  |
| United States of America     | 17.6    | 82.4    | 0.237                             | 0.228                             | 0.520                           | 0.986                                  |
| United States Virgin Islands | 4.6     | 95.5    | 0.850                             | 0.498                             | 0.001                           | 1.349                                  |
| Uruguay                      | 7.5     | 92.6    | 0.000                             | 0.107                             | 0.497                           | 0.604                                  |
| Uzbekistan                   | 63.8    | 36.2    | 0.000                             | 0.495                             | 0.310                           | 0.805                                  |

Table S7. Cont.

| Country                          | % Rural | % Urban | Urban Per Capita Cyclone Exposure | Urban Per Capita Drought Exposure | Urban Per Capita Flood Exposure | Urban Per Capita Multi-Hazard Exposure |
|----------------------------------|---------|---------|-----------------------------------|-----------------------------------|---------------------------------|----------------------------------------|
| Vanuatu                          | 75.1    | 24.9    | 0.895                             | 0.363                             | 0.127                           | 1.385                                  |
| Vatican City State <sup>11</sup> | N/A     | 100.0   | 0.000                             | 0.100                             | 0.100                           | 0.200                                  |
| Venezuela                        | 6.5     | 93.5    | 0.000                             | 0.402                             | 0.635                           | 1.037                                  |
| Vietnam                          | 69.0    | 31.0    | 0.475                             | 0.372                             | 0.877                           | 1.725                                  |
| Wallis and Futuna Islands        | 100.0   | N/A     | 0.000                             | 0.000                             | 0.000                           | N/A                                    |
| Yemen                            | 67.7    | 32.3    | 0.000                             | 0.000                             | 0.625                           | 0.625                                  |
| Zambia                           | 60.9    | 39.2    | 0.000                             | 0.655                             | 0.007                           | 0.662                                  |
| Zimbabwe                         | 61.4    | 38.6    | 0.000                             | 0.878                             | 0.132                           | 1.010                                  |

Notes: <sup>1</sup> includes Christmas Island and Cocos islands; <sup>2</sup> includes Guernsey and Jersey; <sup>3</sup> includes Mayotte; <sup>4</sup> includes Aland Islands; <sup>5</sup> includes Saint Barthelemy and Saint Martin; <sup>6</sup> Special Administrative Region (SAR) of China; <sup>7</sup> includes Western Sahara; <sup>8</sup> Democratic People's Republic of Korea; <sup>9</sup> Republic of Korea; <sup>10</sup> includes Southern Sudan; <sup>11</sup> Holy See.

Table S8. Rural population exposure by country.

| Country                | % Rural | % Urban | Rural Per Capita Cyclone Exposure | Rural Per Capita Drought Exposure | Rural Per Capita Flood Exposure | Rural Per Capita Multi-Hazard Exposure |
|------------------------|---------|---------|-----------------------------------|-----------------------------------|---------------------------------|----------------------------------------|
| Afghanistan            | 76.5    | 23.5    | 0.000                             | 0.569                             | 0.518                           | 1.087                                  |
| Albania                | 46.6    | 53.4    | 0.000                             | 0.026                             | 0.192                           | 0.219                                  |
| Algeria                | 27.0    | 73.0    | 0.000                             | 0.331                             | 0.403                           | 0.734                                  |
| American Samoa         | 6.8     | 93.2    | 0.087                             | 0.090                             | 0.000                           | 0.177                                  |
| Andorra                | 12.7    | 87.3    | 0.000                             | 0.083                             | 0.101                           | 0.184                                  |
| Angola                 | 40.8    | 59.2    | 0.000                             | 0.610                             | 0.051                           | 0.661                                  |
| Anguilla               | N/A     | N/A     | 0.000                             | 0.000                             | 0.000                           | N/A                                    |
| Antigua and Barbuda    | 70.2    | 29.8    | 0.903                             | 0.401                             | 0.099                           | 1.403                                  |
| Argentina              | 7.5     | 92.5    | 0.000                             | 0.275                             | 0.451                           | 0.727                                  |
| Armenia                | 35.9    | 64.1    | 0.000                             | 0.172                             | 0.063                           | 0.235                                  |
| Aruba                  | 53.2    | 46.9    | 0.022                             | 0.112                             | 0.098                           | 0.232                                  |
| Australia <sup>1</sup> | 10.8    | 89.2    | 0.031                             | 0.222                             | 0.222                           | 0.475                                  |
| Austria                | 32.3    | 67.7    | 0.000                             | 0.000                             | 0.381                           | 0.381                                  |
| Azerbaijan             | 46.4    | 53.6    | 0.000                             | 0.486                             | 0.084                           | 0.570                                  |
| Bahamas                | 15.7    | 84.3    | 0.661                             | 0.045                             | 0.000                           | 0.706                                  |
| Bahrain                | 11.3    | 88.7    | 0.000                             | 0.000                             | 0.001                           | 0.001                                  |
| Bangladesh             | 71.6    | 28.4    | 0.149                             | 0.653                             | 0.999                           | 1.802                                  |
| Barbados               | 55.6    | 44.4    | 0.099                             | 0.496                             | 0.098                           | 0.693                                  |
| Belarus                | 25.0    | 75.0    | 0.000                             | 0.000                             | 0.222                           | 0.222                                  |

Table S8. Cont.

| Country                          | % Rural | % Urban | Rural Per Capita Cyclone Exposure | Rural Per Capita Drought Exposure | Rural Per Capita Flood Exposure | Rural Per Capita Multi-Hazard Exposure |
|----------------------------------|---------|---------|-----------------------------------|-----------------------------------|---------------------------------|----------------------------------------|
| Belgium                          | 2.5     | 97.5    | 0.000                             | 0.031                             | 0.593                           | 0.624                                  |
| Belize                           | 55.3    | 44.7    | 0.714                             | 0.000                             | 0.414                           | 1.128                                  |
| Benin                            | 55.1    | 44.9    | 0.000                             | 0.346                             | 0.453                           | 0.799                                  |
| Bermuda                          | N/A     | N/A     | 0.000                             | 0.000                             | 0.000                           | N/A                                    |
| Bhutan                           | 64.4    | 35.6    | 0.000                             | 0.726                             | 0.532                           | 1.257                                  |
| Bolivia                          | 33.2    | 66.8    | 0.000                             | 0.245                             | 0.562                           | 0.808                                  |
| Bosnia and Herzegovina           | 51.7    | 48.3    | 0.000                             | 0.027                             | 0.267                           | 0.294                                  |
| Botswana                         | 38.4    | 61.7    | 0.000                             | 0.501                             | 0.098                           | 0.598                                  |
| Brazil                           | 15.4    | 84.6    | 0.000                             | 0.385                             | 0.315                           | 0.700                                  |
| British Virgin Islands           | 59.4    | 40.6    | 0.898                             | 0.497                             | 0.000                           | 1.395                                  |
| Brunei                           | 24.0    | 76.0    | 0.000                             | 0.104                             | 0.006                           | 0.110                                  |
| Bulgaria                         | 26.9    | 73.1    | 0.000                             | 0.051                             | 0.082                           | 0.133                                  |
| Burkina Faso                     | 73.5    | 26.5    | 0.000                             | 0.324                             | 0.282                           | 0.606                                  |
| Burundi                          | 89.1    | 10.9    | 0.000                             | 0.227                             | 0.572                           | 0.799                                  |
| Cambodia                         | 80.0    | 20.0    | 0.006                             | 0.396                             | 0.879                           | 1.281                                  |
| Cameroon                         | 47.9    | 52.1    | 0.000                             | 0.145                             | 0.141                           | 0.286                                  |
| Canada                           | 19.4    | 80.7    | 0.114                             | 0.120                             | 0.061                           | 0.296                                  |
| Cape Verde                       | 37.4    | 62.6    | 0.021                             | 0.423                             | 0.000                           | 0.444                                  |
| Cayman Islands                   | N/A     | N/A     | 0.000                             | 0.000                             | 0.000                           | N/A                                    |
| Central African Republic         | 60.9    | 39.1    | 0.000                             | 0.189                             | 0.226                           | 0.415                                  |
| Chad                             | 78.2    | 21.8    | 0.000                             | 0.436                             | 0.233                           | 0.669                                  |
| Channel Islands <sup>2</sup>     | 68.8    | 31.2    | 0.032                             | 0.063                             | 0.000                           | 0.095                                  |
| Chile                            | 10.8    | 89.2    | 0.000                             | 0.435                             | 0.355                           | 0.790                                  |
| China                            | 49.4    | 50.6    | 0.154                             | 0.364                             | 0.527                           | 1.045                                  |
| Colombia                         | 24.7    | 75.3    | 0.001                             | 0.331                             | 0.843                           | 1.175                                  |
| Comoros <sup>3</sup>             | 67.2    | 32.8    | 0.400                             | 0.124                             | 0.043                           | 0.567                                  |
| Congo, Republic of the           | 36.3    | 63.7    | 0.000                             | 0.196                             | 0.145                           | 0.341                                  |
| Cook Islands                     | 26.5    | 73.5    | 0.235                             | 0.181                             | 0.000                           | 0.416                                  |
| Costa Rica                       | 35.3    | 64.7    | 0.086                             | 0.255                             | 0.679                           | 1.020                                  |
| Côte d'Ivoire                    | 48.7    | 51.3    | 0.000                             | 0.176                             | 0.022                           | 0.198                                  |
| Croatia                          | 42.2    | 57.8    | 0.000                             | 0.019                             | 0.125                           | 0.144                                  |
| Cuba                             | 24.8    | 75.2    | 0.468                             | 0.272                             | 0.647                           | 1.387                                  |
| Cyprus                           | 29.5    | 70.5    | 0.000                             | 0.514                             | 0.000                           | 0.514                                  |
| Czech Republic                   | 26.6    | 73.4    | 0.000                             | 0.000                             | 0.496                           | 0.496                                  |
| Democratic Republic of the Congo | 65.7    | 34.3    | 0.000                             | 0.127                             | 0.180                           | 0.307                                  |

Table S8. Cont.

| Country                 | % Rural | % Urban | Rural Per Capita Cyclone Exposure | Rural Per Capita Drought Exposure | Rural Per Capita Flood Exposure | Rural Per Capita Multi-Hazard Exposure |
|-------------------------|---------|---------|-----------------------------------|-----------------------------------|---------------------------------|----------------------------------------|
| Denmark                 | 13.1    | 86.9    | 0.000                             | 0.119                             | 0.000                           | 0.119                                  |
| Djibouti                | 22.9    | 77.1    | 0.000                             | 0.824                             | 0.117                           | 0.941                                  |
| Dominica                | 32.9    | 67.1    | 0.804                             | 0.402                             | 0.097                           | 1.303                                  |
| Dominican Republic      | 30.3    | 69.7    | 0.559                             | 0.071                             | 0.786                           | 1.416                                  |
| Ecuador                 | 32.5    | 67.5    | 0.000                             | 0.599                             | 0.800                           | 1.399                                  |
| Egypt                   | 56.5    | 43.5    | 0.000                             | 0.000                             | 0.015                           | 0.015                                  |
| El Salvador             | 35.2    | 64.8    | 0.009                             | 0.017                             | 0.897                           | 0.923                                  |
| Equatorial Guinea       | 60.5    | 39.5    | 0.000                             | 0.036                             | 0.000                           | 0.036                                  |
| Eritrea                 | 78.7    | 21.3    | 0.000                             | 0.790                             | 0.049                           | 0.839                                  |
| Estonia                 | 30.5    | 69.5    | 0.000                             | 0.002                             | 0.000                           | 0.002                                  |
| Ethiopia                | 83.0    | 17.0    | 0.000                             | 0.544                             | 0.222                           | 0.765                                  |
| Faeroe Islands          | 58.9    | 41.1    | 0.000                             | 0.000                             | 0.000                           | 0.000                                  |
| Falkland Islands        | 25.9    | 74.1    | 0.000                             | 0.001                             | 0.000                           | 0.001                                  |
| Fiji                    | 47.8    | 52.2    | 0.738                             | 0.234                             | 0.285                           | 1.257                                  |
| Finland <sup>4</sup>    | 16.3    | 83.7    | 0.000                             | 0.018                             | 0.000                           | 0.018                                  |
| France                  | 14.2    | 85.8    | 0.012                             | 0.047                             | 0.423                           | 0.482                                  |
| French Guiana           | 23.6    | 76.4    | 0.000                             | 0.000                             | 0.000                           | 0.000                                  |
| French Polynesia        | 48.6    | 51.4    | 0.337                             | 0.066                             | 0.000                           | 0.403                                  |
| Gabon                   | 13.8    | 86.2    | 0.000                             | 0.076                             | 0.049                           | 0.125                                  |
| Gambia                  | 42.7    | 57.3    | 0.000                             | 0.436                             | 0.000                           | 0.436                                  |
| Georgia                 | 47.2    | 52.8    | 0.000                             | 0.036                             | 0.331                           | 0.367                                  |
| Germany                 | 26.1    | 73.9    | 0.000                             | 0.045                             | 0.582                           | 0.627                                  |
| Ghana                   | 48.1    | 51.9    | 0.000                             | 0.173                             | 0.187                           | 0.360                                  |
| Gibraltar               | N/A     | N/A     | 0.000                             | 0.000                             | 0.000                           | N/A                                    |
| Greece                  | 38.6    | 61.4    | 0.000                             | 0.489                             | 0.138                           | 0.628                                  |
| Greenland               | 15.3    | 84.7    | 0.000                             | 0.014                             | 0.000                           | 0.014                                  |
| Grenada                 | 60.9    | 39.1    | 0.148                             | 0.000                             | 0.000                           | 0.148                                  |
| Guadeloupe <sup>5</sup> | 1.6     | 98.4    | 0.814                             | 0.400                             | 0.325                           | 1.539                                  |
| Guam                    | 6.8     | 93.2    | 0.999                             | 0.400                             | 0.100                           | 1.498                                  |
| Guatemala               | 50.2    | 49.8    | 0.068                             | 0.804                             | 0.936                           | 1.808                                  |
| Guinea                  | 64.6    | 35.4    | 0.000                             | 0.273                             | 0.018                           | 0.292                                  |
| Guinea-Bissau           | 56.1    | 43.9    | 0.000                             | 0.299                             | 0.000                           | 0.299                                  |
| Guyana                  | 71.6    | 28.4    | 0.000                             | 0.190                             | 0.022                           | 0.212                                  |
| Haiti                   | 46.6    | 53.4    | 0.371                             | 0.047                             | 0.830                           | 1.248                                  |
| Honduras                | 47.8    | 52.2    | 0.115                             | 0.070                             | 0.884                           | 1.069                                  |
| Hong Kong <sup>6</sup>  | N/A     | N/A     | 0.000                             | 0.000                             | 0.000                           | N/A                                    |
| Hungary                 | 30.5    | 69.5    | 0.000                             | 0.027                             | 0.380                           | 0.407                                  |
| Iceland                 | 6.3     | 93.7    | 0.000                             | 0.000                             | 0.000                           | 0.000                                  |
| India                   | 68.7    | 31.3    | 0.044                             | 0.653                             | 0.580                           | 1.277                                  |

Table S8. Cont.

| Country                               | % Rural | % Urban | Rural Per Capita Cyclone Exposure | Rural Per Capita Drought Exposure | Rural Per Capita Flood Exposure | Rural Per Capita Multi-Hazard Exposure |
|---------------------------------------|---------|---------|-----------------------------------|-----------------------------------|---------------------------------|----------------------------------------|
| Indonesia                             | 49.3    | 50.7    | 0.006                             | 0.426                             | 0.639                           | 1.071                                  |
| Iran                                  | 30.9    | 69.1    | 0.000                             | 0.671                             | 0.503                           | 1.175                                  |
| Iraq                                  | 33.5    | 66.5    | 0.000                             | 0.735                             | 0.054                           | 0.789                                  |
| Ireland                               | 37.8    | 62.2    | 0.066                             | 0.005                             | 0.099                           | 0.170                                  |
| Isle of Man                           | 49.5    | 50.5    | 0.000                             | 0.000                             | 0.000                           | 0.000                                  |
| Israel                                | 8.1     | 91.9    | 0.000                             | 0.467                             | 0.508                           | 0.975                                  |
| Italy                                 | 31.6    | 68.4    | 0.000                             | 0.095                             | 0.324                           | 0.419                                  |
| Jamaica                               | 48.0    | 52.0    | 0.166                             | 0.040                             | 0.951                           | 1.156                                  |
| Japan                                 | 8.7     | 91.3    | 0.959                             | 0.011                             | 0.291                           | 1.261                                  |
| Jordan                                | 17.3    | 82.7    | 0.000                             | 0.817                             | 0.331                           | 1.148                                  |
| Kazakhstan                            | 46.4    | 53.6    | 0.000                             | 0.392                             | 0.052                           | 0.444                                  |
| Kenya                                 | 76.0    | 24.0    | 0.000                             | 0.319                             | 0.805                           | 1.125                                  |
| Kiribati                              | 56.1    | 43.9    | 0.000                             | 0.715                             | 0.000                           | 0.715                                  |
| Kuwait                                | 1.8     | 98.3    | 0.000                             | 0.046                             | 0.024                           | 0.070                                  |
| Kyrgyzstan                            | 64.7    | 35.4    | 0.000                             | 0.436                             | 0.087                           | 0.523                                  |
| Laos                                  | 65.8    | 34.3    | 0.270                             | 0.551                             | 0.523                           | 1.345                                  |
| Latvia                                | 32.3    | 67.7    | 0.000                             | 0.001                             | 0.000                           | 0.001                                  |
| Lebanon                               | 12.8    | 87.3    | 0.000                             | 0.900                             | 0.552                           | 1.451                                  |
| Lesotho                               | 72.4    | 27.6    | 0.000                             | 0.807                             | 0.299                           | 1.105                                  |
| Liberia                               | 51.8    | 48.2    | 0.000                             | 0.094                             | 0.003                           | 0.097                                  |
| Libya                                 | 22.3    | 77.7    | 0.000                             | 0.417                             | 0.000                           | 0.417                                  |
| Liechtenstein                         | 85.6    | 14.4    | 0.000                             | 0.000                             | 0.924                           | 0.924                                  |
| Lithuania                             | 32.9    | 67.1    | 0.000                             | 0.000                             | 0.008                           | 0.008                                  |
| Luxembourg                            | 14.6    | 85.4    | 0.000                             | 0.008                             | 0.768                           | 0.776                                  |
| Macao <sup>6</sup>                    | N/A     | N/A     | 0.000                             | 0.000                             | 0.000                           | N/A                                    |
| Macedonia                             | 40.7    | 59.3    | 0.000                             | 0.034                             | 0.433                           | 0.466                                  |
| Madagascar                            | 67.4    | 32.6    | 0.838                             | 0.257                             | 0.238                           | 1.333                                  |
| Malawi                                | 84.3    | 15.7    | 0.075                             | 0.697                             | 0.432                           | 1.204                                  |
| Malaysia                              | 27.2    | 72.8    | 0.000                             | 0.047                             | 0.638                           | 0.685                                  |
| Maldives                              | 58.8    | 41.2    | 0.000                             | 0.000                             | 0.000                           | 0.000                                  |
| Mali                                  | 65.1    | 34.9    | 0.000                             | 0.358                             | 0.114                           | 0.472                                  |
| Malta                                 | 5.2     | 94.8    | 0.000                             | 0.897                             | 0.000                           | 0.897                                  |
| Marshall Islands                      | 28.2    | 71.8    | 0.000                             | 0.000                             | 0.000                           | 0.000                                  |
| Martinique                            | 11.0    | 89.0    | 0.334                             | 0.000                             | 0.057                           | 0.391                                  |
| Mauritania                            | 58.5    | 41.5    | 0.000                             | 0.163                             | 0.029                           | 0.192                                  |
| Mauritius                             | 58.2    | 41.8    | 0.985                             | 0.042                             | 0.000                           | 1.027                                  |
| Mexico                                | 21.9    | 78.1    | 0.137                             | 0.511                             | 0.497                           | 1.145                                  |
| Micronesia,<br>Federated<br>States of | 77.4    | 22.6    | 0.632                             | 0.401                             | 0.000                           | 1.033                                  |



Table S8. Cont.

| Country                  | % Rural | % Urban | Rural Per Capita Cyclone Exposure | Rural Per Capita Drought Exposure | Rural Per Capita Flood Exposure | Rural Per Capita Multi-Hazard Exposure |
|--------------------------|---------|---------|-----------------------------------|-----------------------------------|---------------------------------|----------------------------------------|
| Moldova, Republic of     | 52.3    | 47.7    | 0.000                             | 0.122                             | 0.174                           | 0.297                                  |
| Monaco                   | N/A     | N/A     | 0.000                             | 0.000                             | 0.000                           | N/A                                    |
| Mongolia                 | 31.5    | 68.5    | 0.000                             | 0.078                             | 0.004                           | 0.082                                  |
| Montenegro               | 36.7    | 63.3    | 0.000                             | 0.000                             | 0.226                           | 0.226                                  |
| Montserrat               | 85.8    | 14.2    | 0.767                             | 0.361                             | 0.000                           | 1.128                                  |
| Morocco <sup>7</sup>     | 42.6    | 57.5    | 0.000                             | 0.661                             | 0.128                           | 0.789                                  |
| Mozambique               | 68.8    | 31.2    | 0.386                             | 0.627                             | 0.364                           | 1.378                                  |
| Myanmar                  | 67.4    | 32.6    | 0.032                             | 0.847                             | 0.092                           | 0.970                                  |
| Namibia                  | 61.6    | 38.4    | 0.000                             | 0.558                             | 0.000                           | 0.558                                  |
| Nauru                    | N/A     | N/A     | 0.000                             | 0.000                             | 0.000                           | N/A                                    |
| Nepal                    | 83.0    | 17.0    | 0.000                             | 0.503                             | 0.948                           | 1.452                                  |
| Netherlands              | 16.8    | 83.2    | 0.000                             | 0.069                             | 0.293                           | 0.362                                  |
| Netherlands Antilles     | 6.6     | 93.4    | 0.144                             | 0.415                             | 0.032                           | 0.591                                  |
| New Caledonia            | 38.3    | 61.7    | 0.957                             | 0.419                             | 0.008                           | 1.384                                  |
| New Zealand              | 13.8    | 86.2    | 0.030                             | 0.013                             | 0.270                           | 0.314                                  |
| Nicaragua                | 42.5    | 57.5    | 0.195                             | 0.306                             | 0.675                           | 1.176                                  |
| Niger                    | 82.2    | 17.8    | 0.000                             | 0.388                             | 0.688                           | 1.076                                  |
| Nigeria                  | 50.4    | 49.6    | 0.000                             | 0.437                             | 0.305                           | 0.742                                  |
| Niue                     | 62.1    | 37.9    | 0.545                             | 0.208                             | 0.000                           | 0.753                                  |
| North Korea <sup>8</sup> | 39.7    | 60.3    | 0.457                             | 0.227                             | 0.426                           | 1.109                                  |
| Northern Mariana Islands | 8.5     | 91.5    | 1.022                             | 0.284                             | 0.000                           | 1.306                                  |
| Norway                   | 20.6    | 79.4    | 0.000                             | 0.046                             | 0.005                           | 0.051                                  |
| Oman                     | 26.6    | 73.4    | 0.000                             | 0.025                             | 0.014                           | 0.039                                  |
| Pakistan                 | 26.9    | 73.1    | 0.007                             | 0.750                             | 0.472                           | 1.229                                  |
| Palau                    | 63.8    | 36.2    | 0.136                             | 0.400                             | 0.000                           | 0.536                                  |
| Palestine                | 25.7    | 74.4    | 0.000                             | 0.754                             | 0.442                           | 1.196                                  |
| Panama                   | 15.8    | 84.3    | 0.002                             | 0.082                             | 0.371                           | 0.455                                  |
| Papua New Guinea         | 24.7    | 75.3    | 0.007                             | 0.204                             | 0.017                           | 0.227                                  |
| Paraguay                 | 87.5    | 12.5    | 0.000                             | 0.097                             | 0.798                           | 0.894                                  |
| Peru                     | 38.1    | 61.9    | 0.000                             | 0.190                             | 0.643                           | 0.834                                  |
| Philippines              | 22.7    | 77.3    | 0.807                             | 0.390                             | 0.711                           | 1.909                                  |
| Pitcairn Islands         | 51.2    | 48.8    | 0.000                             | 0.000                             | 0.000                           | 0.000                                  |
| Poland                   | 39.1    | 60.9    | 0.000                             | 0.032                             | 0.326                           | 0.358                                  |
| Portugal                 | 38.9    | 61.1    | 0.008                             | 0.353                             | 0.388                           | 0.749                                  |
| Puerto Rico              | 1.1     | 98.9    | 0.818                             | 0.000                             | 0.578                           | 1.395                                  |
| Qatar                    | 1.2     | 98.8    | 0.000                             | 0.000                             | 0.002                           | 0.002                                  |
| Réunion                  | 5.7     | 94.3    | 0.993                             | 0.000                             | 0.000                           | 0.993                                  |

Table S8. Cont.

| Country                          | % Rural | % Urban | Rural Per Capita Cyclone Exposure | Rural Per Capita Drought Exposure | Rural Per Capita Flood Exposure | Rural Per Capita Multi-Hazard Exposure |
|----------------------------------|---------|---------|-----------------------------------|-----------------------------------|---------------------------------|----------------------------------------|
| Romania                          | 47.2    | 52.8    | 0.000                             | 0.040                             | 0.674                           | 0.714                                  |
| Russia                           | 26.2    | 73.8    | 0.006                             | 0.132                             | 0.093                           | 0.231                                  |
| Rwanda                           | 80.9    | 19.1    | 0.000                             | 0.013                             | 0.820                           | 0.833                                  |
| Saint Helena                     | 60.5    | 39.5    | 0.000                             | 0.000                             | 0.000                           | 0.000                                  |
| Saint Kitts and Nevis            | 68.0    | 32.0    | 0.802                             | 0.902                             | 0.000                           | 1.704                                  |
| Saint Lucia                      | 82.5    | 17.5    | 0.166                             | 0.000                             | 0.042                           | 0.207                                  |
| Saint Pierre and Miquelon        | 9.3     | 90.7    | 0.573                             | 0.000                             | 0.000                           | 0.573                                  |
| Saint Vincent and the Grenadines | 50.7    | 49.3    | 0.222                             | 0.000                             | 0.000                           | 0.222                                  |
| Samoa                            | 80.1    | 19.9    | 0.237                             | 0.092                             | 0.059                           | 0.388                                  |
| San Marino                       | 5.9     | 94.1    | 0.000                             | 0.000                             | 0.102                           | 0.102                                  |
| Sao Tome and Principe            | 37.3    | 62.7    | 0.000                             | 0.000                             | 0.000                           | 0.000                                  |
| Saudi Arabia                     | 17.7    | 82.3    | 0.000                             | 0.056                             | 0.055                           | 0.111                                  |
| Senegal                          | 57.5    | 42.5    | 0.000                             | 0.431                             | 0.068                           | 0.499                                  |
| Serbia                           | 43.6    | 56.4    | 0.000                             | 0.021                             | 0.499                           | 0.520                                  |
| Seychelles                       | 46.4    | 53.6    | 0.000                             | 0.000                             | 0.000                           | 0.000                                  |
| Sierra Leone                     | 60.8    | 39.2    | 0.000                             | 0.536                             | 0.059                           | 0.595                                  |
| Singapore                        | N/A     | N/A     | 0.000                             | 0.000                             | 0.000                           | N/A                                    |
| Slovakia                         | 45.3    | 54.7    | 0.000                             | 0.000                             | 0.505                           | 0.505                                  |
| Slovenia                         | 50.1    | 49.9    | 0.000                             | 0.000                             | 0.078                           | 0.078                                  |
| Solomon Islands                  | 79.5    | 20.5    | 0.217                             | 0.054                             | 0.060                           | 0.330                                  |
| Somalia                          | 62.3    | 37.7    | 0.000                             | 0.719                             | 0.415                           | 1.135                                  |
| South Africa                     | 38.0    | 62.0    | 0.001                             | 0.522                             | 0.478                           | 1.001                                  |
| South Korea <sup>9</sup>         | 16.8    | 83.2    | 0.748                             | 0.149                             | 0.819                           | 1.716                                  |
| Spain                            | 22.6    | 77.4    | 0.002                             | 0.485                             | 0.154                           | 0.641                                  |
| Sri Lanka                        | 84.9    | 15.1    | 0.058                             | 0.108                             | 0.894                           | 1.060                                  |
| Sudan <sup>10</sup>              | 70.3    | 29.7    | 0.000                             | 0.523                             | 0.229                           | 0.751                                  |
| Suriname                         | 30.3    | 69.7    | 0.000                             | 0.001                             | 0.001                           | 0.002                                  |
| Swaziland                        | 78.8    | 21.3    | 0.009                             | 0.900                             | 0.358                           | 1.266                                  |
| Sweden                           | 14.8    | 85.2    | 0.000                             | 0.103                             | 0.001                           | 0.104                                  |
| Switzerland                      | 26.3    | 73.7    | 0.000                             | 0.000                             | 0.757                           | 0.757                                  |
| Syria                            | 43.9    | 56.1    | 0.000                             | 0.801                             | 0.219                           | 1.020                                  |
| Tajikistan                       | 73.5    | 26.5    | 0.000                             | 0.609                             | 0.683                           | 1.292                                  |
| Tanzania, United Republic of     | 73.3    | 26.7    | 0.000                             | 0.407                             | 0.407                           | 0.814                                  |
| Thailand                         | 65.9    | 34.1    | 0.034                             | 0.598                             | 0.841                           | 1.473                                  |
| Timor-Leste                      | 71.7    | 28.3    | 0.054                             | 0.524                             | 0.209                           | 0.787                                  |
| Togo                             | 62.0    | 38.0    | 0.000                             | 0.287                             | 0.296                           | 0.583                                  |

Table S8. Cont.

| Country                          | % Rural | % Urban | Rural Per Capita Cyclone Exposure | Rural Per Capita Drought Exposure | Rural Per Capita Flood Exposure | Rural Per Capita Multi-Hazard Exposure |
|----------------------------------|---------|---------|-----------------------------------|-----------------------------------|---------------------------------|----------------------------------------|
| Tokelau                          | 100.0   | N/A     | 0.000                             | 0.000                             | 0.000                           | 0.000                                  |
| Tonga                            | 76.6    | 23.4    | 0.514                             | 0.316                             | 0.000                           | 0.830                                  |
| Trinidad and Tobago              | 86.3    | 13.7    | 0.010                             | 0.000                             | 0.657                           | 0.667                                  |
| Tunisia                          | 33.7    | 66.3    | 0.000                             | 0.253                             | 0.383                           | 0.636                                  |
| Turkey                           | 28.5    | 71.5    | 0.000                             | 0.434                             | 0.169                           | 0.603                                  |
| Turkmenistan                     | 51.3    | 48.7    | 0.000                             | 0.169                             | 0.102                           | 0.272                                  |
| Turks and Caicos Islands         | 6.2     | 93.8    | 0.780                             | 0.000                             | 0.000                           | 0.780                                  |
| Tuvalu                           | 49.4    | 50.6    | 0.007                             | 0.661                             | 0.000                           | 0.668                                  |
| Uganda                           | 84.4    | 15.6    | 0.000                             | 0.057                             | 0.666                           | 0.723                                  |
| Ukraine                          | 31.1    | 68.9    | 0.000                             | 0.028                             | 0.185                           | 0.213                                  |
| United Arab Emirates             | 15.6    | 84.4    | 0.000                             | 0.453                             | 0.002                           | 0.456                                  |
| United Kingdom                   | 20.4    | 79.6    | 0.064                             | 0.024                             | 0.717                           | 0.805                                  |
| United States of America         | 17.6    | 82.4    | 0.233                             | 0.117                             | 0.514                           | 0.864                                  |
| United States Virgin Islands     | 4.6     | 95.5    | 0.861                             | 0.493                             | 0.010                           | 1.363                                  |
| Uruguay                          | 7.5     | 92.6    | 0.000                             | 0.113                             | 0.625                           | 0.738                                  |
| Uzbekistan                       | 63.8    | 36.2    | 0.000                             | 0.406                             | 0.299                           | 0.705                                  |
| Vanuatu                          | 75.1    | 24.9    | 0.778                             | 0.248                             | 0.104                           | 1.130                                  |
| Vatican City State <sup>11</sup> | N/A     | N/A     | 0.000                             | 0.000                             | 0.000                           | N/A                                    |
| Venezuela                        | 6.5     | 93.5    | 0.002                             | 0.318                             | 0.516                           | 0.837                                  |
| Vietnam                          | 69.0    | 31.0    | 0.479                             | 0.382                             | 0.878                           | 1.740                                  |
| Wallis and Futuna Islands        | 100.0   | N/A     | 0.647                             | 0.200                             | 0.000                           | 0.847                                  |
| Yemen                            | 67.7    | 32.3    | 0.000                             | 0.001                             | 0.606                           | 0.606                                  |
| Zambia                           | 60.9    | 39.2    | 0.000                             | 0.592                             | 0.027                           | 0.619                                  |
| Zimbabwe                         | 61.4    | 38.6    | 0.000                             | 0.773                             | 0.194                           | 0.967                                  |

Notes: <sup>1</sup> includes Christmas Island and Cocos islands; <sup>2</sup> includes Guernsey and Jersey; <sup>3</sup> includes Mayotte; <sup>4</sup> includes Aland Islands; <sup>5</sup> includes Saint Barthelemy and Saint Martin; <sup>6</sup> Special Administrative Region (SAR) of China; <sup>7</sup> includes Western Sahara; <sup>8</sup> Democratic People's Republic of Korea; <sup>9</sup> Republic of Korea; <sup>10</sup> includes Southern Sudan; <sup>11</sup> Holy See.

**Table S9.** Urban and rural population cyclone exposure.

| ISO3 | Country Name                 | Urban Per Capita Cyclone Exposure | Rural Per Capita Cyclone Exposure |
|------|------------------------------|-----------------------------------|-----------------------------------|
| AFG  | Afghanistan                  | 0.000                             | 0.000                             |
| ALB  | Albania                      | 0.000                             | 0.000                             |
| DZA  | Algeria                      | 0.000                             | 0.000                             |
| ASM  | American Samoa               | 0.080                             | 0.087                             |
| AND  | Andorra                      | 0.000                             | 0.000                             |
| AGO  | Angola                       | 0.000                             | 0.000                             |
| AIA  | Anguilla                     | 0.839                             | 0.000                             |
| ATG  | Antigua and Barbuda          | 0.893                             | 0.903                             |
| ARG  | Argentina                    | 0.000                             | 0.000                             |
| ARM  | Armenia                      | 0.000                             | 0.000                             |
| ABW  | Aruba                        | 0.017                             | 0.022                             |
| AUS  | Australia <sup>1</sup>       | 0.032                             | 0.031                             |
| AUT  | Austria                      | 0.000                             | 0.000                             |
| AZE  | Azerbaijan                   | 0.000                             | 0.000                             |
| BHS  | Bahamas                      | 0.546                             | 0.661                             |
| BHR  | Bahrain                      | 0.000                             | 0.000                             |
| BGD  | Bangladesh                   | 0.165                             | 0.149                             |
| BRB  | Barbados                     | 0.101                             | 0.099                             |
| BLR  | Belarus                      | 0.000                             | 0.000                             |
| BEL  | Belgium                      | 0.000                             | 0.000                             |
| BLZ  | Belize                       | 0.807                             | 0.714                             |
| BEN  | Benin                        | 0.000                             | 0.000                             |
| BMU  | Bermuda                      | 0.784                             | 0.000                             |
| BTN  | Bhutan                       | 0.000                             | 0.000                             |
| BOL  | Bolivia                      | 0.000                             | 0.000                             |
| BIH  | Bosnia and Herzegovina       | 0.000                             | 0.000                             |
| BWA  | Botswana                     | 0.000                             | 0.000                             |
| BRA  | Brazil                       | 0.000                             | 0.000                             |
| VGB  | British Virgin Islands       | 0.934                             | 0.898                             |
| BRN  | Brunei                       | 0.000                             | 0.000                             |
| BGR  | Bulgaria                     | 0.000                             | 0.000                             |
| BFA  | Burkina Faso                 | 0.000                             | 0.000                             |
| BDI  | Burundi                      | 0.000                             | 0.000                             |
| KHM  | Cambodia                     | 0.001                             | 0.006                             |
| CMR  | Cameroon                     | 0.000                             | 0.000                             |
| CAN  | Canada                       | 0.095                             | 0.114                             |
| CPV  | Cape Verde                   | 0.006                             | 0.021                             |
| CYM  | Cayman Islands               | 0.526                             | 0.000                             |
| CAF  | Central African Republic     | 0.000                             | 0.000                             |
| TCD  | Chad                         | 0.000                             | 0.000                             |
| CHA  | Channel Islands <sup>2</sup> | 0.060                             | 0.032                             |
| CHL  | Chile                        | 0.000                             | 0.000                             |
| CHN  | China                        | 0.249                             | 0.154                             |

Table S9. Cont.

| ISO3 | Country Name                     | Urban Per Capita Cyclone Exposure | Rural Per Capita Cyclone Exposure |
|------|----------------------------------|-----------------------------------|-----------------------------------|
| COL  | Colombia                         | 0.001                             | 0.001                             |
| COM  | Comoros <sup>3</sup>             | 0.355                             | 0.400                             |
| COG  | Congo, Republic of the           | 0.000                             | 0.000                             |
| COK  | Cook Islands                     | 0.214                             | 0.235                             |
| CRI  | Costa Rica                       | 0.098                             | 0.086                             |
| CIV  | Côte d'Ivoire                    | 0.000                             | 0.000                             |
| HRV  | Croatia                          | 0.000                             | 0.000                             |
| CUB  | Cuba                             | 0.498                             | 0.468                             |
| CYP  | Cyprus                           | 0.000                             | 0.000                             |
| CZE  | Czech Republic                   | 0.000                             | 0.000                             |
| COD  | Democratic Republic of the Congo | 0.000                             | 0.000                             |
| DNK  | Denmark                          | 0.000                             | 0.000                             |
| DJI  | Djibouti                         | 0.000                             | 0.000                             |
| DMA  | Dominica                         | 0.798                             | 0.804                             |
| DOM  | Dominican Republic               | 0.536                             | 0.559                             |
| ECU  | Ecuador                          | 0.000                             | 0.000                             |
| EGY  | Egypt                            | 0.000                             | 0.000                             |
| SLV  | El Salvador                      | 0.002                             | 0.009                             |
| GNQ  | Equatorial Guinea                | 0.000                             | 0.000                             |
| ERI  | Eritrea                          | 0.000                             | 0.000                             |
| EST  | Estonia                          | 0.000                             | 0.000                             |
| ETH  | Ethiopia                         | 0.000                             | 0.000                             |
| FRO  | Faeroe Islands                   | 0.000                             | 0.000                             |
| FLK  | Falkland Islands                 | 0.000                             | 0.000                             |
| FJI  | Fiji                             | 0.786                             | 0.738                             |
| FIN  | Finland <sup>4</sup>             | 0.000                             | 0.000                             |
| FRA  | France                           | 0.007                             | 0.012                             |
| GUF  | French Guiana                    | 0.000                             | 0.000                             |
| PYF  | French Polynesia                 | 0.649                             | 0.337                             |
| GAB  | Gabon                            | 0.000                             | 0.000                             |
| GMB  | Gambia                           | 0.000                             | 0.000                             |
| GEO  | Georgia                          | 0.000                             | 0.000                             |
| DEU  | Germany                          | 0.000                             | 0.000                             |
| GHA  | Ghana                            | 0.000                             | 0.000                             |
| GIB  | Gibraltar                        | 0.000                             | 0.000                             |
| GRC  | Greece                           | 0.000                             | 0.000                             |
| GRL  | Greenland                        | 0.000                             | 0.000                             |
| GRD  | Grenada                          | 0.334                             | 0.148                             |
| GLP  | Guadeloupe <sup>5</sup>          | 0.829                             | 0.814                             |
| GUM  | Guam                             | 1.000                             | 0.999                             |
| GTM  | Guatemala                        | 0.085                             | 0.068                             |
| GIN  | Guinea                           | 0.000                             | 0.000                             |
| GNB  | Guinea-Bissau                    | 0.000                             | 0.000                             |

Table S9. Cont.

| ISO3 | Country Name           | Urban Per Capita Cyclone Exposure | Rural Per Capita Cyclone Exposure |
|------|------------------------|-----------------------------------|-----------------------------------|
| GUY  | Guyana                 | 0.000                             | 0.000                             |
| HTI  | Haiti                  | 0.432                             | 0.371                             |
| HND  | Honduras               | 0.113                             | 0.115                             |
| HKG  | Hong Kong <sup>6</sup> | 0.993                             | 0.000                             |
| HUN  | Hungary                | 0.000                             | 0.000                             |
| ISL  | Iceland                | 0.000                             | 0.000                             |
| IND  | India                  | 0.058                             | 0.044                             |
| IDN  | Indonesia              | 0.006                             | 0.006                             |
| IRN  | Iran                   | 0.000                             | 0.000                             |
| IRQ  | Iraq                   | 0.000                             | 0.000                             |
| IRL  | Ireland                | 0.079                             | 0.066                             |
| IMN  | Isle of Man            | 0.000                             | 0.000                             |
| ISR  | Israel                 | 0.000                             | 0.000                             |
| ITA  | Italy                  | 0.000                             | 0.000                             |
| JAM  | Jamaica                | 0.239                             | 0.166                             |
| JPN  | Japan                  | 0.977                             | 0.959                             |
| JOR  | Jordan                 | 0.000                             | 0.000                             |
| KAZ  | Kazakhstan             | 0.000                             | 0.000                             |
| KEN  | Kenya                  | 0.000                             | 0.000                             |
| KIR  | Kiribati               | 0.000                             | 0.000                             |
| KWT  | Kuwait                 | 0.000                             | 0.000                             |
| KGZ  | Kyrgyzstan             | 0.000                             | 0.000                             |
| LAO  | Laos                   | 0.262                             | 0.270                             |
| LVA  | Latvia                 | 0.000                             | 0.000                             |
| LBN  | Lebanon                | 0.000                             | 0.000                             |
| LSO  | Lesotho                | 0.000                             | 0.000                             |
| LBR  | Liberia                | 0.000                             | 0.000                             |
| LBY  | Libya                  | 0.000                             | 0.000                             |
| LIE  | Liechtenstein          | 0.000                             | 0.000                             |
| LTU  | Lithuania              | 0.000                             | 0.000                             |
| LUX  | Luxembourg             | 0.000                             | 0.000                             |
| MAC  | Macao <sup>6</sup>     | 0.895                             | 0.000                             |
| MKD  | Macedonia              | 0.000                             | 0.000                             |
| MDG  | Madagascar             | 0.882                             | 0.838                             |
| MWI  | Malawi                 | 0.116                             | 0.075                             |
| MYS  | Malaysia               | 0.000                             | 0.000                             |
| MDV  | Maldives               | 0.000                             | 0.000                             |
| MLI  | Mali                   | 0.000                             | 0.000                             |
| MLT  | Malta                  | 0.000                             | 0.000                             |
| MHL  | Marshall Islands       | 0.000                             | 0.000                             |
| MTQ  | Martinique             | 0.138                             | 0.334                             |
| MRT  | Mauritania             | 0.000                             | 0.000                             |
| MUS  | Mauritius              | 1.004                             | 0.985                             |

Table S9. Cont.

| ISO3 | Country Name                    | Urban Per Capita Cyclone Exposure | Rural Per Capita Cyclone Exposure |
|------|---------------------------------|-----------------------------------|-----------------------------------|
| MEX  | Mexico                          | 0.092                             | 0.137                             |
| FSM  | Micronesia, Federated States of | 0.649                             | 0.632                             |
| MDA  | Moldova, Republic of            | 0.000                             | 0.000                             |
| MCO  | Monaco                          | 0.000                             | 0.000                             |
| MNG  | Mongolia                        | 0.000                             | 0.000                             |
| MNE  | Montenegro                      | 0.000                             | 0.000                             |
| MSR  | Montserrat                      | 1.274                             | 0.767                             |
| MAR  | Morocco <sup>7</sup>            | 0.000                             | 0.000                             |
| MOZ  | Mozambique                      | 0.287                             | 0.386                             |
| MMR  | Myanmar                         | 0.031                             | 0.032                             |
| NAM  | Namibia                         | 0.000                             | 0.000                             |
| NRU  | Nauru                           | 0.000                             | 0.000                             |
| NPL  | Nepal                           | 0.000                             | 0.000                             |
| NLD  | Netherlands                     | 0.000                             | 0.000                             |
| ANT  | Netherlands Antilles            | 0.224                             | 0.144                             |
| NCL  | New Caledonia                   | 0.987                             | 0.957                             |
| NZL  | New Zealand                     | 0.022                             | 0.030                             |
| NIC  | Nicaragua                       | 0.126                             | 0.195                             |
| NER  | Niger                           | 0.000                             | 0.000                             |
| NGA  | Nigeria                         | 0.000                             | 0.000                             |
| NIU  | Niue                            | 0.466                             | 0.545                             |
| PRK  | North Korea <sup>8</sup>        | 0.435                             | 0.457                             |
| MNP  | Northern Mariana Islands        | 0.998                             | 1.022                             |
| NOR  | Norway                          | 0.000                             | 0.000                             |
| OMN  | Oman                            | 0.000                             | 0.000                             |
| PAK  | Pakistan                        | 0.014                             | 0.007                             |
| PLW  | Palau                           | 0.098                             | 0.136                             |
| PSE  | Palestine                       | 0.000                             | 0.000                             |
| PAN  | Panama                          | 0.002                             | 0.002                             |
| PNG  | Papua New Guinea                | 0.004                             | 0.007                             |
| PRY  | Paraguay                        | 0.000                             | 0.000                             |
| PER  | Peru                            | 0.000                             | 0.000                             |
| PHL  | Philippines                     | 0.888                             | 0.807                             |
| PCN  | Pitcairn Islands                | 0.000                             | 0.000                             |
| POL  | Poland                          | 0.000                             | 0.000                             |
| PRT  | Portugal                        | 0.006                             | 0.008                             |
| PRI  | Puerto Rico                     | 0.843                             | 0.818                             |
| QAT  | Qatar                           | 0.000                             | 0.000                             |
| REU  | Réunion                         | 0.995                             | 0.993                             |
| ROU  | Romania                         | 0.000                             | 0.000                             |
| RUS  | Russia                          | 0.012                             | 0.006                             |
| RWA  | Rwanda                          | 0.000                             | 0.000                             |
| SHN  | Saint Helena                    | 0.000                             | 0.000                             |

Table S9. Cont.

| ISO3 | Country Name                     | Urban Per Capita Cyclone Exposure | Rural Per Capita Cyclone Exposure |
|------|----------------------------------|-----------------------------------|-----------------------------------|
| KNA  | Saint Kitts and Nevis            | 0.796                             | 0.802                             |
| LCA  | Saint Lucia                      | 0.091                             | 0.166                             |
| SPM  | Saint Pierre and Miquelon        | 0.712                             | 0.573                             |
| VCT  | Saint Vincent and the Grenadines | 0.413                             | 0.222                             |
| WSM  | Samoa                            | 0.124                             | 0.237                             |
| SMR  | San Marino                       | 0.000                             | 0.000                             |
| STP  | Sao Tome and Principe            | 0.000                             | 0.000                             |
| SAU  | Saudi Arabia                     | 0.000                             | 0.000                             |
| SEN  | Senegal                          | 0.000                             | 0.000                             |
| SRB  | Serbia                           | 0.000                             | 0.000                             |
| SYC  | Seychelles                       | 0.000                             | 0.000                             |
| SLE  | Sierra Leone                     | 0.000                             | 0.000                             |
| SGP  | Singapore                        | 0.000                             | 0.000                             |
| SVK  | Slovakia                         | 0.000                             | 0.000                             |
| SVN  | Slovenia                         | 0.000                             | 0.000                             |
| SLB  | Solomon Islands                  | 0.039                             | 0.217                             |
| SOM  | Somalia                          | 0.000                             | 0.000                             |
| ZAF  | South Africa                     | 0.000                             | 0.001                             |
| KOR  | South Korea <sup>9</sup>         | 0.786                             | 0.748                             |
| ESP  | Spain                            | 0.001                             | 0.002                             |
| LKA  | Sri Lanka                        | 0.011                             | 0.058                             |
| SDN  | Sudan <sup>10</sup>              | 0.000                             | 0.000                             |
| SUR  | Suriname                         | 0.000                             | 0.000                             |
| SWZ  | Swaziland                        | 0.001                             | 0.009                             |
| SWE  | Sweden                           | 0.000                             | 0.000                             |
| CHE  | Switzerland                      | 0.000                             | 0.000                             |
| SYR  | Syria                            | 0.000                             | 0.000                             |
| TJK  | Tajikistan                       | 0.000                             | 0.000                             |
| TZA  | Tanzania, United Republic of     | 0.000                             | 0.000                             |
| THA  | Thailand                         | 0.013                             | 0.034                             |
| TLS  | Timor-Leste                      | 0.021                             | 0.054                             |
| TGO  | Togo                             | 0.000                             | 0.000                             |
| TKL  | Tokelau                          | 0.000                             | 0.000                             |
| TON  | Tonga                            | 0.567                             | 0.514                             |
| TTO  | Trinidad and Tobago              | 0.000                             | 0.010                             |
| TUN  | Tunisia                          | 0.000                             | 0.000                             |
| TUR  | Turkey                           | 0.000                             | 0.000                             |
| TKM  | Turkmenistan                     | 0.000                             | 0.000                             |
| TCA  | Turks and Caicos Islands         | 0.728                             | 0.780                             |
| TUV  | Tuvalu                           | 0.096                             | 0.007                             |
| UGA  | Uganda                           | 0.000                             | 0.000                             |
| UKR  | Ukraine                          | 0.000                             | 0.000                             |
| ARE  | United Arab Emirates             | 0.000                             | 0.000                             |



**Table S9.** *Cont.*

| ISO3 | Country Name                     | Urban Per Capita Cyclone Exposure | Rural Per Capita Cyclone Exposure |
|------|----------------------------------|-----------------------------------|-----------------------------------|
| GBR  | United Kingdom                   | 0.062                             | 0.064                             |
| USA  | United States of America         | 0.237                             | 0.233                             |
| VIR  | United States Virgin Islands     | 0.850                             | 0.861                             |
| URY  | Uruguay                          | 0.000                             | 0.000                             |
| UZB  | Uzbekistan                       | 0.000                             | 0.000                             |
| VUT  | Vanuatu                          | 0.895                             | 0.778                             |
| VAT  | Vatican City State <sup>11</sup> | 0.000                             | 0.000                             |
| VEN  | Venezuela                        | 0.000                             | 0.002                             |
| VNM  | Vietnam                          | 0.475                             | 0.479                             |
| WLF  | Wallis and Futuna Islands        | 0.000                             | 0.647                             |
| YEM  | Yemen                            | 0.000                             | 0.000                             |
| ZMB  | Zambia                           | 0.000                             | 0.000                             |
| ZWE  | Zimbabwe                         | 0.000                             | 0.000                             |

Notes: <sup>1</sup> includes Christmas Island and Cocos islands; <sup>2</sup> includes Guernsey and Jersey; <sup>3</sup> includes Mayotte; <sup>4</sup> includes Aland Islands; <sup>5</sup> includes Saint Barthelemy and Saint Martin; <sup>6</sup> Special Administrative Region (SAR) of China; <sup>7</sup> includes Western Sahara; <sup>8</sup> Democratic People's Republic of Korea; <sup>9</sup> Republic of Korea; <sup>10</sup> includes Southern Sudan; <sup>11</sup> Holy See.

**Table S10.** Urban and rural population drought exposure.

| ISO3 | Country Name           | Urban Per Capita Drought Exposure | Rural Per Capita Drought Exposure |
|------|------------------------|-----------------------------------|-----------------------------------|
| AFG  | Afghanistan            | 0.746                             | 0.569                             |
| ALB  | Albania                | 0.001                             | 0.026                             |
| DZA  | Algeria                | 0.382                             | 0.331                             |
| ASM  | American Samoa         | 0.098                             | 0.090                             |
| AND  | Andorra                | 0.094                             | 0.083                             |
| AGO  | Angola                 | 0.706                             | 0.610                             |
| AIA  | Anguilla               | 0.500                             | 0.000                             |
| ATG  | Antigua and Barbuda    | 0.397                             | 0.401                             |
| ARG  | Argentina              | 0.302                             | 0.275                             |
| ARM  | Armenia                | 0.052                             | 0.172                             |
| ABW  | Aruba                  | 0.067                             | 0.112                             |
| AUS  | Australia <sup>1</sup> | 0.279                             | 0.222                             |
| AUT  | Austria                | 0.000                             | 0.000                             |
| AZE  | Azerbaijan             | 0.486                             | 0.486                             |
| BHS  | Bahamas                | 0.003                             | 0.045                             |
| BHR  | Bahrain                | 0.000                             | 0.000                             |
| BGD  | Bangladesh             | 0.556                             | 0.653                             |
| BRB  | Barbados               | 0.505                             | 0.496                             |
| BLR  | Belarus                | 0.000                             | 0.000                             |
| BEL  | Belgium                | 0.021                             | 0.031                             |
| BLZ  | Belize                 | 0.000                             | 0.000                             |

Table S10. Cont.

| ISO3 | Country Name                     | Urban Per Capita Drought Exposure | Rural Per Capita Drought Exposure |
|------|----------------------------------|-----------------------------------|-----------------------------------|
| BEN  | Benin                            | 0.277                             | 0.346                             |
| BMU  | Bermuda                          | 0.000                             | 0.000                             |
| BTN  | Bhutan                           | 0.649                             | 0.726                             |
| BOL  | Bolivia                          | 0.235                             | 0.245                             |
| BIH  | Bosnia and Herzegovina           | 0.020                             | 0.027                             |
| BWA  | Botswana                         | 0.528                             | 0.501                             |
| BRA  | Brazil                           | 0.237                             | 0.385                             |
| VGB  | British Virgin Islands           | 0.505                             | 0.497                             |
| BRN  | Brunei                           | 0.103                             | 0.104                             |
| BGR  | Bulgaria                         | 0.056                             | 0.051                             |
| BFA  | Burkina Faso                     | 0.363                             | 0.324                             |
| BDI  | Burundi                          | 0.156                             | 0.227                             |
| KHM  | Cambodia                         | 0.251                             | 0.396                             |
| CMR  | Cameroon                         | 0.143                             | 0.145                             |
| CAN  | Canada                           | 0.125                             | 0.120                             |
| CPV  | Cape Verde                       | 0.370                             | 0.423                             |
| CYM  | Cayman Islands                   | 0.005                             | 0.000                             |
| CAF  | Central African Republic         | 0.144                             | 0.189                             |
| TCD  | Chad                             | 0.378                             | 0.436                             |
| CHA  | Channel Islands <sup>2</sup>     | 0.119                             | 0.063                             |
| CHL  | Chile                            | 0.751                             | 0.435                             |
| CHN  | China                            | 0.322                             | 0.364                             |
| COL  | Colombia                         | 0.479                             | 0.331                             |
| COM  | Comoros <sup>3</sup>             | 0.098                             | 0.124                             |
| COG  | Congo, Republic of the           | 0.166                             | 0.196                             |
| COK  | Cook Islands                     | 0.178                             | 0.181                             |
| CRI  | Costa Rica                       | 0.198                             | 0.255                             |
| CIV  | Côte d'Ivoire                    | 0.064                             | 0.176                             |
| HRV  | Croatia                          | 0.017                             | 0.019                             |
| CUB  | Cuba                             | 0.262                             | 0.272                             |
| CYP  | Cyprus                           | 0.473                             | 0.514                             |
| CZE  | Czech Republic                   | 0.000                             | 0.000                             |
| COD  | Democratic Republic of the Congo | 0.160                             | 0.127                             |
| DNK  | Denmark                          | 0.079                             | 0.119                             |
| DJI  | Djibouti                         | 0.892                             | 0.824                             |
| DMA  | Dominica                         | 0.399                             | 0.402                             |
| DOM  | Dominican Republic               | 0.044                             | 0.071                             |
| ECU  | Ecuador                          | 0.676                             | 0.599                             |
| EGY  | Egypt                            | 0.000                             | 0.000                             |
| SLV  | El Salvador                      | 0.003                             | 0.017                             |
| GNQ  | Equatorial Guinea                | 0.116                             | 0.036                             |
| ERI  | Eritrea                          | 0.831                             | 0.790                             |
| EST  | Estonia                          | 0.001                             | 0.002                             |

Table S10. Cont.

| ISO3 | Country Name            | Urban Per Capita Drought Exposure | Rural Per Capita Drought Exposure |
|------|-------------------------|-----------------------------------|-----------------------------------|
| ETH  | Ethiopia                | 0.611                             | 0.544                             |
| FRO  | Faeroe Islands          | 0.000                             | 0.000                             |
| FLK  | Falkland Islands        | 0.000                             | 0.001                             |
| FJI  | Fiji                    | 0.262                             | 0.234                             |
| FIN  | Finland <sup>4</sup>    | 0.011                             | 0.018                             |
| FRA  | France                  | 0.038                             | 0.047                             |
| GUF  | French Guiana           | 0.000                             | 0.000                             |
| PYF  | French Polynesia        | 0.000                             | 0.066                             |
| GAB  | Gabon                   | 0.091                             | 0.076                             |
| GMB  | Gambia                  | 0.412                             | 0.436                             |
| GEO  | Georgia                 | 0.010                             | 0.036                             |
| DEU  | Germany                 | 0.053                             | 0.045                             |
| GHA  | Ghana                   | 0.058                             | 0.173                             |
| GIB  | Gibraltar               | 1.000                             | 0.000                             |
| GRC  | Greece                  | 0.561                             | 0.489                             |
| GRL  | Greenland               | 0.049                             | 0.014                             |
| GRD  | Grenada                 | 0.000                             | 0.000                             |
| GLP  | Guadeloupe <sup>5</sup> | 0.408                             | 0.400                             |
| GUM  | Guam                    | 0.400                             | 0.400                             |
| GTM  | Guatemala               | 0.880                             | 0.804                             |
| GIN  | Guinea                  | 0.515                             | 0.273                             |
| GNB  | Guinea-Bissau           | 0.226                             | 0.299                             |
| GUY  | Guyana                  | 0.200                             | 0.190                             |
| HTI  | Haiti                   | 0.067                             | 0.047                             |
| HND  | Honduras                | 0.065                             | 0.070                             |
| HKG  | Hong Kong <sup>6</sup>  | 0.095                             | 0.000                             |
| HUN  | Hungary                 | 0.026                             | 0.027                             |
| ISL  | Iceland                 | 0.000                             | 0.000                             |
| IND  | India                   | 0.652                             | 0.653                             |
| IDN  | Indonesia               | 0.424                             | 0.426                             |
| IRN  | Iran                    | 0.659                             | 0.671                             |
| IRQ  | Iraq                    | 0.712                             | 0.735                             |
| IRL  | Ireland                 | 0.004                             | 0.005                             |
| IMN  | Isle of Man             | 0.000                             | 0.000                             |
| ISR  | Israel                  | 0.335                             | 0.467                             |
| ITA  | Italy                   | 0.083                             | 0.095                             |
| JAM  | Jamaica                 | 0.016                             | 0.040                             |
| JPN  | Japan                   | 0.009                             | 0.011                             |
| JOR  | Jordan                  | 0.875                             | 0.817                             |
| KAZ  | Kazakhstan              | 0.465                             | 0.392                             |
| KEN  | Kenya                   | 0.253                             | 0.319                             |
| KIR  | Kiribati                | 0.700                             | 0.715                             |
| KWT  | Kuwait                  | 0.000                             | 0.046                             |

Table S10. Cont.

| ISO3 | Country Name                    | Urban Per Capita Drought Exposure | Rural Per Capita Drought Exposure |
|------|---------------------------------|-----------------------------------|-----------------------------------|
| KGZ  | Kyrgyzstan                      | 0.482                             | 0.436                             |
| LAO  | Laos                            | 0.487                             | 0.551                             |
| LVA  | Latvia                          | 0.000                             | 0.001                             |
| LBN  | Lebanon                         | 0.900                             | 0.900                             |
| LSO  | Lesotho                         | 0.686                             | 0.807                             |
| LBR  | Liberia                         | 0.169                             | 0.094                             |
| LBY  | Libya                           | 0.441                             | 0.417                             |
| LIE  | Liechtenstein                   | 0.000                             | 0.000                             |
| LTU  | Lithuania                       | 0.000                             | 0.000                             |
| LUX  | Luxembourg                      | 0.002                             | 0.008                             |
| MAC  | Macao <sup>6</sup>              | 0.100                             | 0.000                             |
| MKD  | Macedonia                       | 0.009                             | 0.034                             |
| MDG  | Madagascar                      | 0.199                             | 0.257                             |
| MWI  | Malawi                          | 0.727                             | 0.697                             |
| MYS  | Malaysia                        | 0.029                             | 0.047                             |
| MDV  | Maldives                        | 0.000                             | 0.000                             |
| MLI  | Mali                            | 0.412                             | 0.358                             |
| MLT  | Malta                           | 0.900                             | 0.897                             |
| MHL  | Marshall Islands                | 0.000                             | 0.000                             |
| MTQ  | Martinique                      | 0.000                             | 0.000                             |
| MRT  | Mauritania                      | 0.185                             | 0.163                             |
| MUS  | Mauritius                       | 0.000                             | 0.042                             |
| MEX  | Mexico                          | 0.532                             | 0.511                             |
| FSM  | Micronesia, Federated States of | 0.395                             | 0.401                             |
| MDA  | Moldova, Republic of            | 0.154                             | 0.122                             |
| MCO  | Monaco                          | 0.100                             | 0.000                             |
| MNG  | Mongolia                        | 0.328                             | 0.078                             |
| MNE  | Montenegro                      | 0.000                             | 0.000                             |
| MSR  | Montserrat                      | 0.637                             | 0.361                             |
| MAR  | Morocco <sup>7</sup>            | 0.700                             | 0.661                             |
| MOZ  | Mozambique                      | 0.588                             | 0.627                             |
| MMR  | Myanmar                         | 0.851                             | 0.847                             |
| NAM  | Namibia                         | 0.646                             | 0.558                             |
| NRU  | Nauru                           | 0.900                             | 0.000                             |
| NPL  | Nepal                           | 0.575                             | 0.503                             |
| NLD  | Netherlands                     | 0.056                             | 0.069                             |
| ANT  | Netherlands Antilles            | 0.426                             | 0.415                             |
| NCL  | New Caledonia                   | 0.400                             | 0.419                             |
| NZL  | New Zealand                     | 0.017                             | 0.013                             |
| NIC  | Nicaragua                       | 0.634                             | 0.306                             |
| NER  | Niger                           | 0.411                             | 0.388                             |
| NGA  | Nigeria                         | 0.465                             | 0.437                             |
| NIU  | Niue                            | 0.187                             | 0.208                             |

Table S10. Cont.

| ISO3 | Country Name                     | Urban Per Capita Drought Exposure | Rural Per Capita Drought Exposure |
|------|----------------------------------|-----------------------------------|-----------------------------------|
| PRK  | North Korea <sup>8</sup>         | 0.218                             | 0.227                             |
| MNP  | Northern Mariana Islands         | 0.224                             | 0.284                             |
| NOR  | Norway                           | 0.062                             | 0.046                             |
| OMN  | Oman                             | 0.011                             | 0.025                             |
| PAK  | Pakistan                         | 0.787                             | 0.750                             |
| PLW  | Palau                            | 0.392                             | 0.400                             |
| PSE  | Palestine                        | 0.466                             | 0.754                             |
| PAN  | Panama                           | 0.045                             | 0.082                             |
| PNG  | Papua New Guinea                 | 0.160                             | 0.204                             |
| PRY  | Paraguay                         | 0.082                             | 0.097                             |
| PER  | Peru                             | 0.165                             | 0.190                             |
| PHL  | Philippines                      | 0.394                             | 0.390                             |
| PCN  | Pitcairn Islands                 | 0.000                             | 0.000                             |
| POL  | Poland                           | 0.035                             | 0.032                             |
| PRT  | Portugal                         | 0.399                             | 0.353                             |
| PRI  | Puerto Rico                      | 0.000                             | 0.000                             |
| QAT  | Qatar                            | 0.000                             | 0.000                             |
| REU  | Réunion                          | 0.000                             | 0.000                             |
| ROU  | Romania                          | 0.047                             | 0.040                             |
| RUS  | Russia                           | 0.098                             | 0.132                             |
| RWA  | Rwanda                           | 0.006                             | 0.013                             |
| SHN  | Saint Helena                     | 0.000                             | 0.000                             |
| KNA  | Saint Kitts and Nevis            | 0.895                             | 0.902                             |
| LCA  | Saint Lucia                      | 0.000                             | 0.000                             |
| SPM  | Saint Pierre and Miquelon        | 0.000                             | 0.000                             |
| VCT  | Saint Vincent and the Grenadines | 0.000                             | 0.000                             |
| WSM  | Samoa                            | 0.099                             | 0.092                             |
| SMR  | San Marino                       | 0.000                             | 0.000                             |
| STP  | Sao Tome and Principe            | 0.000                             | 0.000                             |
| SAU  | Saudi Arabia                     | 0.021                             | 0.056                             |
| SEN  | Senegal                          | 0.412                             | 0.431                             |
| SRB  | Serbia                           | 0.010                             | 0.021                             |
| SYC  | Seychelles                       | 0.000                             | 0.000                             |
| SLE  | Sierra Leone                     | 0.671                             | 0.536                             |
| SGP  | Singapore                        | 0.000                             | 0.000                             |
| SVK  | Slovakia                         | 0.000                             | 0.000                             |
| SVN  | Slovenia                         | 0.000                             | 0.000                             |
| SLB  | Solomon Islands                  | 0.059                             | 0.054                             |
| SOM  | Somalia                          | 0.867                             | 0.719                             |
| ZAF  | South Africa                     | 0.514                             | 0.522                             |
| KOR  | South Korea <sup>9</sup>         | 0.166                             | 0.149                             |
| ESP  | Spain                            | 0.404                             | 0.485                             |
| LKA  | Sri Lanka                        | 0.051                             | 0.108                             |

Table S10. Cont.

| ISO3 | Country Name                     | Urban Per Capita Drought Exposure | Rural Per Capita Drought Exposure |
|------|----------------------------------|-----------------------------------|-----------------------------------|
| SDN  | Sudan <sup>10</sup>              | 0.326                             | 0.523                             |
| SUR  | Suriname                         | 0.000                             | 0.001                             |
| SWZ  | Swaziland                        | 0.901                             | 0.900                             |
| SWE  | Sweden                           | 0.115                             | 0.103                             |
| CHE  | Switzerland                      | 0.000                             | 0.000                             |
| SYR  | Syria                            | 0.867                             | 0.801                             |
| TJK  | Tajikistan                       | 0.680                             | 0.609                             |
| TZA  | Tanzania, United Republic of     | 0.325                             | 0.407                             |
| THA  | Thailand                         | 0.483                             | 0.598                             |
| TLS  | Timor-Leste                      | 0.512                             | 0.524                             |
| TGO  | Togo                             | 0.154                             | 0.287                             |
| TKL  | Tokelau                          | 0.000                             | 0.000                             |
| TON  | Tonga                            | 0.409                             | 0.316                             |
| TTO  | Trinidad and Tobago              | 0.000                             | 0.000                             |
| TUN  | Tunisia                          | 0.308                             | 0.253                             |
| TUR  | Turkey                           | 0.369                             | 0.434                             |
| TKM  | Turkmenistan                     | 0.112                             | 0.169                             |
| TCA  | Turks and Caicos Islands         | 0.000                             | 0.000                             |
| TUV  | Tuvalu                           | 0.096                             | 0.661                             |
| UGA  | Uganda                           | 0.013                             | 0.057                             |
| UKR  | Ukraine                          | 0.030                             | 0.028                             |
| ARE  | United Arab Emirates             | 0.689                             | 0.453                             |
| GBR  | United Kingdom                   | 0.033                             | 0.024                             |
| USA  | United States of America         | 0.228                             | 0.117                             |
| VIR  | United States Virgin Islands     | 0.498                             | 0.493                             |
| URY  | Uruguay                          | 0.107                             | 0.113                             |
| UZB  | Uzbekistan                       | 0.495                             | 0.406                             |
| VUT  | Vanuatu                          | 0.363                             | 0.248                             |
| VAT  | Vatican City State <sup>11</sup> | 0.100                             | 0.000                             |
| VEN  | Venezuela                        | 0.402                             | 0.318                             |
| VNM  | Vietnam                          | 0.372                             | 0.382                             |
| WLF  | Wallis and Futuna Islands        | 0.000                             | 0.200                             |
| YEM  | Yemen                            | 0.000                             | 0.001                             |
| ZMB  | Zambia                           | 0.655                             | 0.592                             |
| ZWE  | Zimbabwe                         | 0.878                             | 0.773                             |

Notes: <sup>1</sup> includes Christmas Island and Cocos islands; <sup>2</sup> includes Guernsey and Jersey; <sup>3</sup> includes Mayotte; <sup>4</sup> includes Aland Islands; <sup>5</sup> includes Saint Barthelemy and Saint Martin; <sup>6</sup> Special Administrative Region (SAR) of China; <sup>7</sup> includes Western Sahara; <sup>8</sup> Democratic People's Republic of Korea; <sup>9</sup> Republic of Korea; <sup>10</sup> includes Southern Sudan; <sup>11</sup> Holy See.

**Table S11.** Urban and rural population flood exposure.

| <b>ISO3</b> | <b>Country Name</b>          | <b>Urban Per Capita<br/>Flood Exposure</b> | <b>Rural Per Capita<br/>Flood Exposure</b> |
|-------------|------------------------------|--------------------------------------------|--------------------------------------------|
| AFG         | Afghanistan                  | 0.725                                      | 0.518                                      |
| ALB         | Albania                      | 0.159                                      | 0.192                                      |
| DZA         | Algeria                      | 0.434                                      | 0.403                                      |
| ASM         | American Samoa               | 0.000                                      | 0.000                                      |
| AND         | Andorra                      | 0.100                                      | 0.101                                      |
| AGO         | Angola                       | 0.147                                      | 0.051                                      |
| AIA         | Anguilla                     | 0.037                                      | 0.000                                      |
| ATG         | Antigua and Barbuda          | 0.099                                      | 0.099                                      |
| ARG         | Argentina                    | 0.657                                      | 0.451                                      |
| ARM         | Armenia                      | 0.018                                      | 0.063                                      |
| ABW         | Aruba                        | 0.102                                      | 0.098                                      |
| AUS         | Australia <sup>1</sup>       | 0.435                                      | 0.222                                      |
| AUT         | Austria                      | 0.423                                      | 0.381                                      |
| AZE         | Azerbaijan                   | 0.072                                      | 0.084                                      |
| BHS         | Bahamas                      | 0.000                                      | 0.000                                      |
| BHR         | Bahrain                      | 0.000                                      | 0.001                                      |
| BGD         | Bangladesh                   | 0.999                                      | 0.999                                      |
| BRB         | Barbados                     | 0.101                                      | 0.098                                      |
| BLR         | Belarus                      | 0.157                                      | 0.222                                      |
| BEL         | Belgium                      | 0.534                                      | 0.593                                      |
| BLZ         | Belize                       | 0.396                                      | 0.414                                      |
| BEN         | Benin                        | 0.421                                      | 0.453                                      |
| BMU         | Bermuda                      | 0.100                                      | 0.000                                      |
| BTN         | Bhutan                       | 0.525                                      | 0.532                                      |
| BOL         | Bolivia                      | 0.649                                      | 0.562                                      |
| BIH         | Bosnia and Herzegovina       | 0.272                                      | 0.267                                      |
| BWA         | Botswana                     | 0.070                                      | 0.098                                      |
| BRA         | Brazil                       | 0.610                                      | 0.315                                      |
| VGB         | British Virgin Islands       | 0.000                                      | 0.000                                      |
| BRN         | Brunei                       | 0.000                                      | 0.006                                      |
| BGR         | Bulgaria                     | 0.058                                      | 0.082                                      |
| BFA         | Burkina Faso                 | 0.324                                      | 0.282                                      |
| BDI         | Burundi                      | 0.498                                      | 0.572                                      |
| KHM         | Cambodia                     | 0.844                                      | 0.879                                      |
| CMR         | Cameroon                     | 0.241                                      | 0.141                                      |
| CAN         | Canada                       | 0.083                                      | 0.061                                      |
| CPV         | Cape Verde                   | 0.000                                      | 0.000                                      |
| CYM         | Cayman Islands               | 0.000                                      | 0.000                                      |
| CAF         | Central African Republic     | 0.442                                      | 0.226                                      |
| TCD         | Chad                         | 0.242                                      | 0.233                                      |
| CHA         | Channel Islands <sup>2</sup> | 0.000                                      | 0.000                                      |
| CHL         | Chile                        | 0.670                                      | 0.355                                      |
| CHN         | China                        | 0.577                                      | 0.527                                      |

Table S11. Cont.

| ISO3 | Country Name                     | Urban Per Capita<br>Flood Exposure | Rural Per Capita<br>Flood Exposure |
|------|----------------------------------|------------------------------------|------------------------------------|
| COL  | Colombia                         | 0.855                              | 0.843                              |
| COM  | Comoros <sup>3</sup>             | 0.025                              | 0.043                              |
| COG  | Congo, Republic of the           | 0.229                              | 0.145                              |
| COK  | Cook Islands                     | 0.000                              | 0.000                              |
| CRI  | Costa Rica                       | 0.506                              | 0.679                              |
| CIV  | Côte d'Ivoire                    | 0.045                              | 0.022                              |
| HRV  | Croatia                          | 0.103                              | 0.125                              |
| CUB  | Cuba                             | 0.467                              | 0.647                              |
| CYP  | Cyprus                           | 0.000                              | 0.000                              |
| CZE  | Czech Republic                   | 0.539                              | 0.496                              |
| COD  | Democratic Republic of the Congo | 0.275                              | 0.180                              |
| DNK  | Denmark                          | 0.000                              | 0.000                              |
| DJI  | Djibouti                         | 0.015                              | 0.117                              |
| DMA  | Dominica                         | 0.096                              | 0.097                              |
| DOM  | Dominican Republic               | 0.796                              | 0.786                              |
| ECU  | Ecuador                          | 0.854                              | 0.800                              |
| EGY  | Egypt                            | 0.065                              | 0.015                              |
| SLV  | El Salvador                      | 0.900                              | 0.897                              |
| GNQ  | Equatorial Guinea                | 0.000                              | 0.000                              |
| ERI  | Eritrea                          | 0.000                              | 0.049                              |
| EST  | Estonia                          | 0.000                              | 0.000                              |
| ETH  | Ethiopia                         | 0.269                              | 0.222                              |
| FRO  | Faeroe Islands                   | 0.000                              | 0.000                              |
| FLK  | Falkland Islands                 | 0.000                              | 0.000                              |
| FJI  | Fiji                             | 0.334                              | 0.285                              |
| FIN  | Finland <sup>4</sup>             | 0.000                              | 0.000                              |
| FRA  | France                           | 0.550                              | 0.423                              |
| GUF  | French Guiana                    | 0.000                              | 0.000                              |
| PYF  | French Polynesia                 | 0.000                              | 0.000                              |
| GAB  | Gabon                            | 0.030                              | 0.049                              |
| GMB  | Gambia                           | 0.000                              | 0.000                              |
| GEO  | Georgia                          | 0.378                              | 0.331                              |
| DEU  | Germany                          | 0.602                              | 0.582                              |
| GHA  | Ghana                            | 0.325                              | 0.187                              |
| GIB  | Gibraltar                        | 0.000                              | 0.000                              |
| GRC  | Greece                           | 0.289                              | 0.138                              |
| GRL  | Greenland                        | 0.000                              | 0.000                              |
| GRD  | Grenada                          | 0.000                              | 0.000                              |
| GLP  | Guadeloupe <sup>5</sup>          | 0.355                              | 0.325                              |
| GUM  | Guam                             | 0.100                              | 0.100                              |
| GTM  | Guatemala                        | 0.973                              | 0.936                              |
| GIN  | Guinea                           | 0.009                              | 0.018                              |
| GNB  | Guinea-Bissau                    | 0.000                              | 0.000                              |



Table S11. Cont.

| ISO3 | Country Name           | Urban Per Capita<br>Flood Exposure | Rural Per Capita<br>Flood Exposure |
|------|------------------------|------------------------------------|------------------------------------|
| GUY  | Guyana                 | 0.004                              | 0.022                              |
| HTI  | Haiti                  | 0.912                              | 0.830                              |
| HND  | Honduras               | 0.905                              | 0.884                              |
| HKG  | Hong Kong <sup>6</sup> | 0.997                              | 0.000                              |
| HUN  | Hungary                | 0.300                              | 0.380                              |
| ISL  | Iceland                | 0.000                              | 0.000                              |
| IND  | India                  | 0.671                              | 0.580                              |
| IDN  | Indonesia              | 0.761                              | 0.639                              |
| IRN  | Iran                   | 0.560                              | 0.503                              |
| IRQ  | Iraq                   | 0.051                              | 0.054                              |
| IRL  | Ireland                | 0.235                              | 0.099                              |
| IMN  | Isle of Man            | 0.000                              | 0.000                              |
| ISR  | Israel                 | 0.424                              | 0.508                              |
| ITA  | Italy                  | 0.348                              | 0.324                              |
| JAM  | Jamaica                | 0.980                              | 0.951                              |
| JPN  | Japan                  | 0.461                              | 0.291                              |
| JOR  | Jordan                 | 0.281                              | 0.331                              |
| KAZ  | Kazakhstan             | 0.023                              | 0.052                              |
| KEN  | Kenya                  | 0.880                              | 0.805                              |
| KIR  | Kiribati               | 0.000                              | 0.000                              |
| KWT  | Kuwait                 | 0.000                              | 0.024                              |
| KGZ  | Kyrgyzstan             | 0.085                              | 0.087                              |
| LAO  | Laos                   | 0.547                              | 0.523                              |
| LVA  | Latvia                 | 0.000                              | 0.000                              |
| LBN  | Lebanon                | 0.607                              | 0.552                              |
| LSO  | Lesotho                | 0.168                              | 0.299                              |
| LBR  | Liberia                | 0.001                              | 0.003                              |
| LBY  | Libya                  | 0.000                              | 0.000                              |
| LIE  | Liechtenstein          | 0.755                              | 0.924                              |
| LTU  | Lithuania              | 0.013                              | 0.008                              |
| LUX  | Luxembourg             | 0.768                              | 0.768                              |
| MAC  | Macao <sup>6</sup>     | 1.000                              | 0.000                              |
| MKD  | Macedonia              | 0.445                              | 0.433                              |
| MDG  | Madagascar             | 0.372                              | 0.238                              |
| MWI  | Malawi                 | 0.472                              | 0.432                              |
| MYS  | Malaysia               | 0.685                              | 0.638                              |
| MDV  | Maldives               | 0.000                              | 0.000                              |
| MLI  | Mali                   | 0.121                              | 0.114                              |
| MLT  | Malta                  | 0.000                              | 0.000                              |
| MHL  | Marshall Islands       | 0.000                              | 0.000                              |
| MTQ  | Martinique             | 0.015                              | 0.057                              |
| MRT  | Mauritania             | 0.014                              | 0.029                              |
| MUS  | Mauritius              | 0.000                              | 0.000                              |

Table S11. Cont.

| ISO3 | Country Name                    | Urban Per Capita<br>Flood Exposure | Rural Per Capita<br>Flood Exposure |
|------|---------------------------------|------------------------------------|------------------------------------|
| MEX  | Mexico                          | 0.552                              | 0.497                              |
| FSM  | Micronesia, Federated States of | 0.000                              | 0.000                              |
| MDA  | Moldova, Republic of            | 0.149                              | 0.174                              |
| MCO  | Monaco                          | 0.400                              | 0.000                              |
| MNG  | Mongolia                        | 0.002                              | 0.004                              |
| MNE  | Montenegro                      | 0.248                              | 0.226                              |
| MSR  | Montserrat                      | 0.000                              | 0.000                              |
| MAR  | Morocco <sup>7</sup>            | 0.168                              | 0.128                              |
| MOZ  | Mozambique                      | 0.537                              | 0.364                              |
| MMR  | Myanmar                         | 0.081                              | 0.092                              |
| NAM  | Namibia                         | 0.000                              | 0.000                              |
| NRU  | Nauru                           | 0.000                              | 0.000                              |
| NPL  | Nepal                           | 0.983                              | 0.948                              |
| NLD  | Netherlands                     | 0.271                              | 0.293                              |
| ANT  | Netherlands Antilles            | 0.001                              | 0.032                              |
| NCL  | New Caledonia                   | 0.004                              | 0.008                              |
| NZL  | New Zealand                     | 0.474                              | 0.270                              |
| NIC  | Nicaragua                       | 0.688                              | 0.675                              |
| NER  | Niger                           | 0.707                              | 0.688                              |
| NGA  | Nigeria                         | 0.343                              | 0.305                              |
| NIU  | Niue                            | 0.000                              | 0.000                              |
| PRK  | North Korea <sup>8</sup>        | 0.354                              | 0.426                              |
| MNP  | Northern Mariana Islands        | 0.000                              | 0.000                              |
| NOR  | Norway                          | 0.004                              | 0.005                              |
| OMN  | Oman                            | 0.011                              | 0.014                              |
| PAK  | Pakistan                        | 0.566                              | 0.472                              |
| PLW  | Palau                           | 0.000                              | 0.000                              |
| PSE  | Palestine                       | 0.358                              | 0.442                              |
| PAN  | Panama                          | 0.432                              | 0.371                              |
| PNG  | Papua New Guinea                | 0.024                              | 0.017                              |
| PRY  | Paraguay                        | 0.874                              | 0.798                              |
| PER  | Peru                            | 0.655                              | 0.643                              |
| PHL  | Philippines                     | 0.832                              | 0.711                              |
| PCN  | Pitcairn Islands                | 0.000                              | 0.000                              |
| POL  | Poland                          | 0.306                              | 0.326                              |
| PRT  | Portugal                        | 0.336                              | 0.388                              |
| PRI  | Puerto Rico                     | 0.557                              | 0.578                              |
| QAT  | Qatar                           | 0.000                              | 0.002                              |
| REU  | Réunion                         | 0.000                              | 0.000                              |
| ROU  | Romania                         | 0.648                              | 0.674                              |
| RUS  | Russia                          | 0.109                              | 0.093                              |
| RWA  | Rwanda                          | 0.809                              | 0.820                              |
| SHN  | Saint Helena                    | 0.000                              | 0.000                              |

Table S11. Cont.

| ISO3 | Country Name                     | Urban Per Capita<br>Flood Exposure | Rural Per Capita<br>Flood Exposure |
|------|----------------------------------|------------------------------------|------------------------------------|
| KNA  | Saint Kitts and Nevis            | 0.000                              | 0.000                              |
| LCA  | Saint Lucia                      | 0.091                              | 0.042                              |
| SPM  | Saint Pierre and Miquelon        | 0.000                              | 0.000                              |
| VCT  | Saint Vincent and the Grenadines | 0.000                              | 0.000                              |
| WSM  | Samoa                            | 0.099                              | 0.059                              |
| SMR  | San Marino                       | 0.100                              | 0.102                              |
| STP  | Sao Tome and Principe            | 0.000                              | 0.000                              |
| SAU  | Saudi Arabia                     | 0.134                              | 0.055                              |
| SEN  | Senegal                          | 0.090                              | 0.068                              |
| SRB  | Serbia                           | 0.546                              | 0.499                              |
| SYC  | Seychelles                       | 0.000                              | 0.000                              |
| SLE  | Sierra Leone                     | 0.034                              | 0.059                              |
| SGP  | Singapore                        | 0.900                              | 0.000                              |
| SVK  | Slovakia                         | 0.484                              | 0.505                              |
| SVN  | Slovenia                         | 0.055                              | 0.078                              |
| SLB  | Solomon Islands                  | 0.052                              | 0.060                              |
| SOM  | Somalia                          | 0.632                              | 0.415                              |
| ZAF  | South Africa                     | 0.352                              | 0.478                              |
| KOR  | South Korea <sup>9</sup>         | 0.874                              | 0.819                              |
| ESP  | Spain                            | 0.214                              | 0.154                              |
| LKA  | Sri Lanka                        | 0.803                              | 0.894                              |
| SDN  | Sudan <sup>10</sup>              | 0.495                              | 0.229                              |
| SUR  | Suriname                         | 0.000                              | 0.001                              |
| SWZ  | Swaziland                        | 0.196                              | 0.358                              |
| SWE  | Sweden                           | 0.001                              | 0.001                              |
| CHE  | Switzerland                      | 0.749                              | 0.757                              |
| SYR  | Syria                            | 0.261                              | 0.219                              |
| TJK  | Tajikistan                       | 0.671                              | 0.683                              |
| TZA  | Tanzania, United Republic of     | 0.509                              | 0.407                              |
| THA  | Thailand                         | 0.765                              | 0.841                              |
| TLS  | Timor-Leste                      | 0.135                              | 0.209                              |
| TGO  | Togo                             | 0.150                              | 0.296                              |
| TKL  | Tokelau                          | 0.000                              | 0.000                              |
| TON  | Tonga                            | 0.000                              | 0.000                              |
| TTO  | Trinidad and Tobago              | 0.627                              | 0.657                              |
| TUN  | Tunisia                          | 0.267                              | 0.383                              |
| TUR  | Turkey                           | 0.289                              | 0.169                              |
| TKM  | Turkmenistan                     | 0.156                              | 0.102                              |
| TCA  | Turks and Caicos Islands         | 0.000                              | 0.000                              |
| TUV  | Tuvalu                           | 0.000                              | 0.000                              |
| UGA  | Uganda                           | 0.754                              | 0.666                              |
| UKR  | Ukraine                          | 0.134                              | 0.185                              |
| ARE  | United Arab Emirates             | 0.000                              | 0.002                              |

Table S11. Cont.

| ISO3 | Country Name                     | Urban Per Capita<br>Flood Exposure | Rural Per Capita<br>Flood Exposure |
|------|----------------------------------|------------------------------------|------------------------------------|
| GBR  | United Kingdom                   | 0.817                              | 0.717                              |
| USA  | United States of America         | 0.520                              | 0.514                              |
| VIR  | United States Virgin Islands     | 0.001                              | 0.010                              |
| URY  | Uruguay                          | 0.497                              | 0.625                              |
| UZB  | Uzbekistan                       | 0.310                              | 0.299                              |
| VUT  | Vanuatu                          | 0.127                              | 0.104                              |
| VAT  | Vatican City State <sup>11</sup> | 0.100                              | 0.000                              |
| VEN  | Venezuela                        | 0.635                              | 0.516                              |
| VNM  | Vietnam                          | 0.877                              | 0.878                              |
| WLF  | Wallis and Futuna Islands        | 0.000                              | 0.000                              |
| YEM  | Yemen                            | 0.625                              | 0.606                              |
| ZMB  | Zambia                           | 0.007                              | 0.027                              |
| ZWE  | Zimbabwe                         | 0.132                              | 0.194                              |

Notes: <sup>1</sup> includes Christmas Island and Cocos islands; <sup>2</sup> includes Guernsey and Jersey; <sup>3</sup> includes Mayotte; <sup>4</sup> includes Aland Islands; <sup>5</sup> includes Saint Barthelemy and Saint Martin; <sup>6</sup> Special Administrative Region (SAR) of China; <sup>7</sup> includes Western Sahara; <sup>8</sup> Democratic People's Republic of Korea; <sup>9</sup> Republic of Korea; <sup>10</sup> includes Southern Sudan; <sup>11</sup> Holy See.

## References

1. Exposure Assessment Global Model. ArcGIS Toolbox. The Water Institute, Gillings School of Global Public Health, University of North Carolina: Chapel Hill, NC, USA. Available online: <http://waterinstitute.unc.edu> (accessed on 17 February 2014).
2. Dilley, M.; Chen, R.S.; Deichmann, U.; Lerner-Lam, A.L.; Arnold, M.; Agwe, J.; Buys, P.; Kjekstad, O.; Lyon, B.; Yetman, G. *Natural Disaster Hotspots A Global Risk Analysis*; the International Bank for Reconstruction and Development, the World Bank and Columbia University: Washington, DC, USA, 2005.
3. *Global Assessment Report on Disaster Risk Reduction*; United Nations International Strategy for Disaster Reduction (UNISDR): Geneva, Switzerland, 2009.
4. *Global Assessment Report on Disaster Risk Reduction*; United Nations International Strategy for Disaster Reduction (UNISDR): Geneva, Switzerland, 2013.

© 2014 by the authors; licensee MDPI, Basel, Switzerland. This article is an open access article distributed under the terms and conditions of the Creative Commons Attribution license (<http://creativecommons.org/licenses/by/3.0/>).
